# Supplementary material for: The conformers of 3-fluoroalanine. A theoretical study
Source: Royal Society of Chemistry journal article supplement (doi:10.1039/c2ob06492h), 2011-12-07
Supplement: c2ob06492h.pdf [file c2ob06492h.pdf]

## **Influence of a Fluorine Substituent on the Physicochemical Properties and Chemical Reactivity of Fluorinated Amino Acids.**

### **1. The Conformers of 3-Fluoroalanine. A Theoretical Study**

Ionel Humelnicu\*<sup>#</sup> Ernst-Ulrich Würthwein,\* Günter Haufe\*

*Organisch Chemisches Institut, Universität Münster, Corrensstr. 40, D-48149 Münster, Germany*

*Email: [wurthwe@uni-muenster.de](mailto:wurthwe@uni-muenster.de), [haufe@uni-muenster.de](mailto:haufe@uni-muenster.de)*

*<sup>#</sup> present address: "Al. I. Cuza" University of Iasi, The Faculty of Chemistry, Theoretical and Physical Chemistry  
Department, 11, Carol-I, 700506 Iasi, Romania*

*Email: [ionel@uaic.ro](mailto:ionel@uaic.ro)*

### **Table of Contents**

|                                                                                                                                                  |    |
|--------------------------------------------------------------------------------------------------------------------------------------------------|----|
| Alanine and 3-fluoroalanine conformers in the gas phase                                                                                          | 3  |
| Dipole moments, NBO charges, structural parameters, Tables S-1 to S-4                                                                            |    |
| Alanine and 3-fluoroalanine conformers in water                                                                                                  | 6  |
| Dipole moments, NBO charges, structural parameters, Tables S-5 to S-8                                                                            |    |
| Alanine and 3-fluoroalanine zwitterionic conformers in water                                                                                     | 8  |
| Dipole moments, NBO charges, structural parameters, Tables S-9 to S-14                                                                           |    |
| Protonated Alanine and 3-fluoroalanine conformers in the gas phase                                                                               | 11 |
| Dipole moments, NBO charges, structural parameters, Tables S-15 to S-20                                                                          |    |
| Protonated Alanine and 3-fluoroalanine conformers in water                                                                                       | 12 |
| Dipole moments, NBO charges, structural parameters, Tables S-21 to S-22                                                                          |    |
| Alanine anion conformers in the gas phase and in water                                                                                           | 13 |
| Dipole moments, NBO charges, structural parameters, Tables S-23 to S-28                                                                          |    |
| 3-Fluoroalanine anion conformers in the gas phase and in water                                                                                   | 14 |
| Dipole moments, NBO charges, structural parameters, Tables S-29 to S-30                                                                          |    |
| Alanine and 3-fluoroalanine conformers, Total energies, relative energies,<br>dipole moments and two point energies in the gas phase, Table S-31 | 15 |
| Alanine and 3-fluoroalanine conformers, total energies, relative energies,<br>dipole moments and two point energies in water, Table S-32         | 16 |

|                                                                                            |    |
|--------------------------------------------------------------------------------------------|----|
| Figure S-1. 3-Fluoroalanine conformers <b>1Fa-4Fa</b> in the gas phase                     | 18 |
| Figure S-2. Atomic charges for 3-fluoroalanine conformers in the gas phase<br>and in water | 19 |
| Figures S-3 and S-4. Alanine zwitterions                                                   | 22 |
| Figures S-5 and S-6. Protonated alanine and 3-fluoroalanine conformers                     | 23 |
| Figure S-7. Hydrogen bridges in 3-fluoroalanine conformers in the gas phase                | 24 |
| Figure S-8. 3-Fluoroalanine anion conformers in the gas phase                              | 25 |
| Calculated structures (xyz-coordinates and NBO charges                                     |    |
| Alanines, Gas Phase                                                                        | 26 |
| Alanines, CPCM                                                                             | 27 |
| 3-Fluoroalanines gas phase                                                                 | 29 |
| 3-Fluoroalanines, CPCM                                                                     | 37 |
| Alanine Zwitterion, CPCM                                                                   | 46 |
| 3-Fluoroalanines, Zwitterions CPCM                                                         | 47 |
| Alanines, protonated gas phase                                                             | 49 |
| Alanine Protonated-CPCM                                                                    | 50 |
| 3-Fluoroalanines, protonated, gas phase                                                    | 52 |
| 3-Fluoroalanine, protonated CPCM                                                           | 56 |
| Alanine Anions gas phase                                                                   | 60 |
| Alanine Anions CPCM                                                                        | 61 |
| 3-Fluoroalanines, Anions, gas phase                                                        | 61 |
| 3-Fluoroalanine Anion-CPCM                                                                 | 64 |

**Table S-1.** Dipole moments and NBO charges of alanine conformers **1-4** in the gas phase [B3LYP 6-311++G(d,p)].

| Conformer | Dipole [D] | C1    | C2     | C3     | H4    | N      | O6     | O7     | H8    | H9    | H10   | H11   | H12   | H13   |
|-----------|------------|-------|--------|--------|-------|--------|--------|--------|-------|-------|-------|-------|-------|-------|
| <b>1</b>  | 1.305      | 0.793 | -0.119 | -0.573 | 0.199 | -0.831 | -0.607 | -0.693 | 0.478 | 0.357 | 0.358 | 0.210 | 0.216 | 0.212 |
| <b>2</b>  | 5.582      | 0.789 | -0.128 | -0.580 | 0.204 | -0.880 | -0.591 | -0.686 | 0.499 | 0.372 | 0.370 | 0.205 | 0.200 | 0.231 |
| <b>3</b>  | 1.632      | 0.791 | -0.116 | -0.574 | 0.201 | -0.831 | -0.602 | -0.704 | 0.484 | 0.356 | 0.358 | 0.210 | 0.216 | 0.210 |
| <b>4</b>  | 3.319      | 0.782 | -0.128 | -0.576 | 0.208 | -0.830 | -0.574 | -0.679 | 0.469 | 0.359 | 0.361 | 0.191 | 0.219 | 0.198 |

**Table S-2.** Structural parameters for alanine conformers **1-4** in the gas phase [6-311++G(d,p)].

| Conformer | Rel. Energies [kcal/mol] | Level | Bond lengths [Å] |       |       |       |       |       |       | Angle [°] |        | Dihedral angles [°] |          |
|-----------|--------------------------|-------|------------------|-------|-------|-------|-------|-------|-------|-----------|--------|---------------------|----------|
|           |                          |       | 5,8              | 6,9   | 7,9   | 6,10  | 7,10  | 7,8   | 5,9   | 5,10      | 9,5,10 | 9,5,2,1             | 5,2,1,6* |
| <b>1</b>  | 0.00                     | RHF   | -                | 2.857 | -     | 2.692 | -     | 0.946 | 0.999 | 1.000     | 106.77 | -60.12              | -14.47   |
|           |                          | B3LYP | -                | 2.934 | -     | 2.687 | -     | 0.969 | 1.015 | 1.016     | 106.42 | -61.13              | -18.62   |
| <b>2</b>  | 1.28                     | RHF   | 2.053            | -     | -     | -     | -     | 0.949 | 1.000 | 0.998     | 107.85 | -86.72              | 161.35   |
|           |                          | B3LYP | 1.918            | -     | -     | -     | -     | 0.983 | 1.014 | 1.013     | 107.89 | -96.02              | 167.88   |
| <b>3</b>  | 1.00                     | RHF   | -                | -     | 3.097 | -     | 2.566 | 0.946 | 0.999 | 0.999     | 108.07 | -61.95              | 135.88   |
|           |                          | B3LYP | -                | -     | 3.106 | -     | 2.576 | 0.969 | 1.014 | 1.015     | 107.55 | -60.36              | 135.68   |
| <b>4</b>  | 5.47                     | RHF   | -                | 2.859 | -     | 2.648 | -     | 0.942 | 1.000 | 1.001     | 106.57 | -60.41              | -17.38   |
|           |                          | B3LYP | -                | 2.920 | -     | 2.653 | -     | 0.965 | 1.015 | 1.016     | 106.19 | -60.76              | -20.17   |

\* atom numbers according to Fig. 3

**Table S-3a.** Selected bond lengths, intramolecular atom distances (Å) and dipole moments (D) of twenty 3-fluoroalanine conformers **1Fa-4Fc** [B3LYP 6-311++G(d,p)].

| Conformer   | 1Fa   | 1Fb-1 | 1Fb-2 | 1Fb-3 | 1Fc   | 2Fa-1 | 2Fa-2 | 2Fa-3 | 2Fb   | 2Fc   |
|-------------|-------|-------|-------|-------|-------|-------|-------|-------|-------|-------|
| Dipole [D]  | 2.424 | 2.015 | 2.000 | 2.537 | 1.932 | 5.602 | 3.215 | 4.189 | 3.752 | 6.047 |
| C-F         | 1.405 | 1.405 | 1.402 | 1.393 | 1.399 | 1.406 | 1.423 | 1.408 | 1.403 | 1.394 |
| O-H         | 0.969 | 0.970 | 0.970 | 0.969 | 0.970 | 0.982 | 0.970 | 0.970 | 0.982 | 0.978 |
| N-H9        | 1.014 | 1.013 | 1.014 | 1.013 | 1.013 | 1.012 | 1.014 | 1.008 | 1.013 | 1.013 |
| N-H10       | 1.015 | 1.014 | 1.015 | 1.015 | 1.016 | 1.016 | 1.015 | 1.009 | 1.016 | 1.016 |
| N...H-O     | -     | -     | -     | -     | -     | 1.921 | -     | 2.228 | 1.930 | 1.994 |
| C=O...H-O   | 2.306 | 2.300 | 2.307 | 2.307 | 2.308 | -     | -     | -     | -     | 2.308 |
| N-H9...O-H  | -     | -     | -     | -     | -     | -     | -     | -     | -     | -     |
| N-H10...O-H | -     | -     | -     | -     | -     | -     | -     | -     | -     | -     |
| N-H9...O=C  | 2.701 | -     | -     | 3.138 | 3.342 | -     | 3.134 | -     | -     | -     |
| N-H10...O=C | 2.876 | 2.381 | 2.423 | 2.514 | 2.570 | -     | -     | -     | -     | -     |
| C-F...H9-N  | 3.775 | 2.619 | 2.485 | 3.703 | -     | 3.493 | -     | -     | 2.888 | -     |
| C-F...H10-N | 2.539 | -     | -     | 3.583 | -     | 2.345 | 2.591 | 2.461 | 2.983 | -     |
| C-F...H-O   | -     | -     | -     | -     | 3.870 | -     | 1.918 | -     | -     | -     |
| C-F...H11   | -     | -     | -     | -     | 2.665 | -     | -     | -     | -     | 2.439 |

**Table S-3a:**

| Conformer   | 3Fa   | 3Fb-1 | 3Fb-2 | 3Fb-3 | 3Fb-4 | 3Fb-5 | 3Fc   | 4Fa   | 4Fb   | 4Fc   |
|-------------|-------|-------|-------|-------|-------|-------|-------|-------|-------|-------|
| Dipole [D]  | 1.874 | 2.354 | 2.225 | 2.871 | 2.962 | 3.288 | 2.882 | 4.248 | 2.022 | 3.641 |
| C-F         | 1.406 | 1.406 | 1.401 | 1.395 | 1.393 | 1.393 | 1.399 | 1.399 | 1.393 | 1.422 |
| O-H         | 0.969 | 0.969 | 0.969 | 0.970 | 0.969 | 0.969 | 0.969 | 0.965 | 0.965 | 0.971 |
| N-H9        | 1.013 | 1.015 | 1.014 | 1.014 | 1.013 | 1.013 | 1.013 | 1.014 | 1.014 | 1.011 |
| N-H10       | 1.014 | 1.014 | 1.015 | 1.015 | 1.015 | 1.014 | 1.014 | 1.016 | 1.016 | 1.016 |
| N...H-O     | -     | -     | -     | -     | -     | -     | -     | -     | -     | -     |
| C=O...H-O   | 2.294 | 2.302 | 2.304 | 2.303 | 2.306 | 2.288 | 2.306 | -     | -     | -     |
| N-H9...O-H  | 2.629 | -     | -     | 2.898 | -     | 2.691 | -     | -     | -     | -     |
| N-H10...O-H | 2.763 | 2.429 | 2.417 | -     | 2.603 | 2.694 | 2.657 | -     | -     | -     |
| N-H9...O=C  | -     | -     | -     | -     | 3.532 | -     | 3.409 | 2.704 | 3.170 | 3.469 |
| N-H10...O=C | -     | -     | -     | 3.142 | -     | -     | -     | 2.788 | 2.494 | 2.179 |
| C-F...H9-N  | 3.760 | 2.489 | 2.550 | -     | -     | 3.781 | -     | 3.792 | 3.746 | -     |
| C-F...H10-N | 2.510 | -     | -     | -     | -     | 3.427 | -     | 2.568 | 3.592 | -     |
| C-F...H-O   | -     | -     | -     | -     | -     | -     | -     | -     | -     | 1.896 |
| C-F...H11   | -     | -     | -     | -     | -     | -     | 2.677 | -     | -     | 2.586 |

**Table S-3b.** Dipole moments and NBO charges of 3-fluoroalanine conformers **1Fa-4Fc** in the gas phase [B3LYP 6-311++G(d,p)].

| Conf.        | Dipole [D] | C1    | C2     | C3    | Fa (H4)* | N5     | O6     | O7     | H8    | H9    | H10   | H11   | Fb (H12)* | Fc (H13)* |
|--------------|------------|-------|--------|-------|----------|--------|--------|--------|-------|-------|-------|-------|-----------|-----------|
| <b>1Fa</b>   | 2,424      | 0,795 | -0,159 | 0,091 | -0,401   | -0,833 | -0,593 | -0,697 | 0,486 | 0,364 | 0,366 | 0,224 | 0,176     | 0,179     |
| <b>1Fb-1</b> | 2,015      | 0,807 | -0,154 | 0,093 | 0,173    | -0,847 | -0,591 | -0,690 | 0,488 | 0,367 | 0,376 | 0,203 | -0,402    | 0,178     |
| <b>1Fb-2</b> | 2,000      | 0,803 | -0,154 | 0,086 | 0,164    | -0,837 | -0,591 | -0,685 | 0,486 | 0,366 | 0,369 | 0,218 | -0,399    | 0,174     |
| <b>1Fb-3</b> | 2,537      | 0,789 | -0,158 | 0,100 | 0,165    | -0,828 | -0,596 | -0,689 | 0,482 | 0,360 | 0,365 | 0,227 | -0,388    | 0,171     |
| <b>1Fc</b>   | 1,932      | 0,794 | -0,152 | 0,099 | 0,167    | -0,833 | -0,608 | -0,673 | 0,480 | 0,362 | 0,367 | 0,216 | 0,175     | -0,395    |
| <b>2Fa-1</b> | 5,602      | 0,793 | -0,171 | 0,081 | -0,401   | -0,880 | -0,588 | -0,676 | 0,501 | 0,374 | 0,381 | 0,228 | 0,161     | 0,197     |
| <b>2Fa-2</b> | 3,215      | 0,777 | -0,169 | 0,078 | -0,414   | -0,830 | -0,570 | -0,686 | 0,487 | 0,369 | 0,360 | 0,230 | 0,189     | 0,178     |
| <b>2Fa-3</b> | 4,189      | 0,785 | -0,173 | 0,093 | -0,404   | -0,879 | -0,579 | -0,668 | 0,474 | 0,367 | 0,380 | 0,232 | 0,173     | 0,189     |
| <b>2Fb</b>   | 3,752      | 0,788 | -0,169 | 0,084 | 0,161    | -0,872 | -0,584 | -0,677 | 0,501 | 0,382 | 0,366 | 0,227 | -0,402    | 0,194     |
| <b>2Fc</b>   | 6,047      | 0,787 | -0,172 | 0,086 | 0,177    | -0,870 | -0,566 | -0,681 | 0,497 | 0,374 | 0,365 | 0,231 | 0,157     | -0,386    |
| <b>3Fa</b>   | 1,874      | 0,794 | -0,159 | 0,093 | -0,402   | -0,835 | -0,604 | -0,687 | 0,487 | 0,363 | 0,366 | 0,227 | 0,175     | 0,183     |
| <b>3Fb-1</b> | 2,354      | 0,811 | -0,151 | 0,093 | 0,176    | -0,844 | -0,594 | -0,690 | 0,488 | 0,367 | 0,368 | 0,199 | -0,404    | 0,181     |
| <b>3Fb-2</b> | 2,225      | 0,804 | -0,152 | 0,086 | 0,163    | -0,835 | -0,587 | -0,693 | 0,489 | 0,366 | 0,362 | 0,223 | -0,399    | 0,175     |
| <b>3Fb-3</b> | 2,871      | 0,786 | -0,153 | 0,097 | 0,170    | -0,815 | -0,603 | -0,688 | 0,484 | 0,364 | 0,355 | 0,221 | -0,390    | 0,171     |
| <b>3Fb-4</b> | 2,962      | 0,786 | -0,152 | 0,098 | 0,168    | -0,822 | -0,586 | -0,704 | 0,487 | 0,362 | 0,360 | 0,225 | -0,387    | 0,166     |
| <b>3Fb-5</b> | 3,288      | 0,787 | -0,159 | 0,098 | 0,157    | -0,824 | -0,602 | -0,689 | 0,487 | 0,363 | 0,354 | 0,231 | -0,388    | 0,185     |
| <b>3Fc</b>   | 2,882      | 0,792 | -0,150 | 0,095 | 0,168    | -0,829 | -0,586 | -0,704 | 0,487 | 0,366 | 0,361 | 0,219 | 0,174     | -0,394    |
| <b>4Fa</b>   | 4,248      | 0,784 | -0,169 | 0,090 | -0,395   | -0,832 | -0,558 | -0,674 | 0,467 | 0,366 | 0,369 | 0,213 | 0,185     | 0,153     |
| <b>4Fb</b>   | 2,022      | 0,778 | -0,164 | 0,097 | 0,174    | -0,827 | -0,565 | -0,673 | 0,472 | 0,360 | 0,368 | 0,206 | -0,388    | 0,160     |
| <b>4Fc</b>   | 3,641      | 0,795 | -0,169 | 0,086 | 0,179    | -0,855 | -0,578 | -0,675 | 0,493 | 0,363 | 0,390 | 0,206 | 0,179     | -0,414    |

\* according to Figure 3C

**Table S-4.** Structural parameters<sup>a,b,c</sup> for 3-fluoroalanine conformers in the gas phase [6-311++G(d,p)].

| Conformer    | Level | Bond lengths [Å] |       |       |       |         |       |       | Angle [°] |        | Dihedral angles [°] |         |         |
|--------------|-------|------------------|-------|-------|-------|---------|-------|-------|-----------|--------|---------------------|---------|---------|
|              |       | 3,F              | 5,8   | 6,9   | 6,10  | F,(9)10 | 7,8   | 5,9   | 5,10      | 9,5,10 | F,3,2,5             | 9,5,2,1 | 5,2,1,6 |
| <b>1Fa</b>   | RHF   | 1.373            | -     | 2.684 | 2.832 | 2.544   | 0.946 | 0.999 | 1.000     | 106.91 | 64.78               | -53.70  | 1.94    |
|              | B3LYP | 1.405            | -     | 2.701 | 2.876 | 2.539   | 0.969 | 1.014 | 1.015     | 106.60 | 64.22               | -51.74  | 1.07    |
| <b>1Fb-1</b> | RHF   | 1.372            | -     | -     | 2.403 | (2.550) | 0.946 | 0.998 | 0.999     | 109.61 | -61.57              | -166.81 | 22.14   |
|              | B3LYP | 1.405            | -     | -     | 2.381 | (2.619) | 0.970 | 1.013 | 1.014     | 109.69 | -63.22              | -163.56 | 20.33   |
| <b>1Fb-2</b> | RHF   | 1.369            | -     | -     | 2.459 | (2.517) | 0.946 | 0.998 | 0.999     | 109.49 | -59.60              | 170.68  | -27.61  |
|              | B3LYP | 1.402            | -     | -     | 2.423 | (2.485) | 0.970 | 1.014 | 1.015     | 109.48 | -57.76              | 165.73  | -24.71  |
| <b>1Fb-3</b> | RHF   | 1.361            | -     | 3.018 | 2.567 | -       | 0.946 | 0.999 | 1.000     | 107.41 | -69.14              | -73.13  | -14.01  |
|              | B3LYP | 1.393            | -     | 3.138 | 2.515 | -       | 0.969 | 1.013 | 1.015     | 107.24 | -70.26              | -78.96  | -16.37  |
| <b>1Fc</b>   | RHF   | 1.368            | -     | 3.287 | 2.559 | -       | 0.947 | 0.999 | 1.001     | 107.98 | 177.82              | -76.73  | -43.60  |
|              | B3LYP | 1.399            | -     | 3.342 | 2.570 | -       | 0.970 | 1.013 | 1.016     | 107.71 | 178.94              | -77.33  | -45.04  |
| <b>2Fa-1</b> | RHF   | 1.373            | 2.034 | -     | -     | 2.381   | 0.949 | 0.998 | 1.001     | 108.46 | 52.61               | -145.94 | -168.64 |
|              | B3LYP | 1.406            | 1.921 | -     | -     | 2.345   | 0.982 | 1.012 | 1.016     | 108.60 | 49.68               | -141.10 | -171.19 |
| <b>2Fa-2</b> | RHF   | 1.385            | -     | -     | -     | 2.542   | 0.944 | 0.999 | 0.999     | 108.74 | 61.54               | -56.65  | 104.446 |
|              | B3LYP | 1.423            | -     | -     | -     | 2.591   | 0.970 | 1.014 | 1.015     | 108.18 | 64.03               | 55.55   | 95.92   |
| <b>2Fa-3</b> | RHF   | 1.376            | 2.321 | -     | -     | 2.465   | 0.942 | 0.996 | 0.997     | 112.57 | 60.35               | -59.83  | 167.44  |
|              | B3LYP | 1.408            | 2.228 | -     | -     | 2.461   | 0.970 | 1.008 | 1.009     | 114.75 | 58.14               | -65.29  | 171.84  |
| <b>2Fb</b>   | RHF   | 1.371            | 2.071 | -     | -     | -       | 0.949 | 0.998 | 1.002     | 107.34 | -57.81              | -156.83 | -157.61 |
|              | B3LYP | 1.403            | 1.930 | -     | -     | -       | 0.983 | 1.013 | 1.016     | 107.16 | -60.36              | -149.55 | -164.89 |
| <b>2Fc</b>   | RHF   | 1.362            | 2.147 | -     | -     | -       | 0.947 | 0.999 | 1.001     | 108.28 | -157.55             | -161.41 | -143.61 |
|              | B3LYP | 1.394            | 1.994 | -     | -     | -       | 0.978 | 1.013 | 1.016     | 108.07 | -152.47             | -156.26 | -153.91 |
|              |       |                  | 6,8   | 7,9   | 7,10  |         |       |       |           |        |                     |         |         |
| <b>3Fa</b>   | RHF   | 1.374            | 2.269 | 2.616 | 2.747 | 2.512   | 0.946 | 0.998 | 0.999     | 107.69 | 62.11               | -57.78  | -179.46 |
|              | B3LYP | 1.406            | 2.294 | 2.629 | 2.763 | 2.511   | 0.969 | 1.013 | 1.014     | 107.37 | 61.72               | -53.85  | 178.38  |
| <b>3Fb-1</b> | RHF   | 1.375            | 2.280 | -     | 2.470 | (2.452) | 0.946 | 0.999 | 0.999     | 108.48 | -62.83              | 177.29  | -130.66 |
|              | B3LYP | 1.406            | 2.302 | -     | 2.429 | (2.498) | 0.969 | 1.015 | 1.014     | 108.38 | -63.59              | -179.03 | -136.06 |
| <b>3Fb-2</b> | RHF   | 1.369            | 2.283 | -     | 2.491 | (2.602) | 0.946 | 0.999 | 1.000     | 108.61 | -60.17              | -175.01 | 134.78  |
|              | B3LYP | 1.401            | 2.304 | -     | 2.417 | 2.550   | 0.969 | 1.014 | 1.015     | 108.43 | -58.69              | 178.19  | 146.49  |
| <b>3Fb-3</b> | RHF   | 1.364            | 2.278 | 2.673 | -     | -       | 0.946 | 0.998 | 1.000     | 108.82 | -67.04              | -63.94  | -116.81 |
|              | B3LYP | 1.395            | 2.303 | 2.897 | -     | -       | 0.970 | 1.014 | 1.015     | 108.69 | -68.77              | -67.18  | -96.51  |
| <b>3Fb-4</b> | RHF   | 1.361            | 2.282 | -     | 2.568 | -       | 0.946 | 0.998 | 0.999     | 108.94 | -69.77              | -69.82  | 125.61  |
|              | B3LYP | 1.393            | 2.306 | -     | 2.603 | -       | 0.969 | 1.013 | 1.015     | 108.59 | -70.14              | -68.80  | 120.43  |
| <b>3Fb-5</b> | RHF   | 1.364            | 2.278 | 2.672 | 3.225 | -       | 0.946 | 0.998 | 1.000     | 108.82 | -67.04              | -63.93  | -116.81 |
|              | B3LYP | 1.393            | 2.288 | 2.692 | 2.694 | -       | 0.969 | 1.013 | 1.014     | 107.42 | -67.99              | -64.48  | -172.41 |
| <b>3Fc</b>   | RHF   | 1.368            | 2.283 | -     | 2.636 | -       | 0.946 | 0.998 | 0.999     | 108.63 | 177.79              | -70.57  | 112.61  |
|              | B3LYP | 1.399            | 2.306 | -     | 2.657 | -       | 0.969 | 1.013 | 1.015     | 108.25 | 179.43              | -69.97  | 109.98  |
|              |       |                  | F,8   | 6,9   | 6,10  |         |       |       |           |        |                     |         |         |
| <b>4Fa</b>   | RHF   | 1.366            | -     | 2.708 | 2.735 | 2.555   | 0.941 | 0.999 | 1.001     | 106.63 | 65.64               | -55.49  | -4.93   |
|              | B3LYP | 1.399            | -     | 2.704 | 2.788 | 2.568   | 0.965 | 1.014 | 1.016     | 106.24 | 66.25               | -53.43  | -3.04   |
| <b>4Fb</b>   | RHF   | 1.361            | -     | 3.086 | 2.518 | -       | 0.942 | 0.999 | 1.001     | 107.43 | -72.89              | -73.95  | -24.32  |
|              | B3LYP | 1.393            | -     | 3.170 | 2.494 | -       | 0.956 | 1.014 | 1.016     | 107.17 | -73.49              | -77.44  | -25.23  |
| <b>4Fc</b>   | RHF   | 1.381            | 2.021 | 2.950 | 2.471 | -       | 0.944 | 0.998 | 1.001     | 106.38 | -172.81             | -78.18  | -1.07   |
|              | B3LYP | 1.422            | 1.896 | 3.469 | 2.179 | -       | 0.971 | 1.011 | 1.016     | 108.81 | -173.71             | -130.45 | 12.28   |

<sup>a)</sup> atom numbers according to Fig. 3, <sup>b)</sup> distance F,8 is 1.896 Å in **4Fc**, 1.918 Å in **2Fa-2** and > 3.9 Å in all other conformers

**Table S-5.** Dipole moments and NBO charges of alanine conformers **1<sub>aq</sub>**-**4<sub>aq</sub>** in water, [B3LYP, 6-311++G(d,p)] CPCM model

| Conf.                 | Dipole [D] | C1    | C2     | C3     | H4    | N5     | O6     | O7     | H8    | H9    | H10   | H11   | H12   | H13   |
|-----------------------|------------|-------|--------|--------|-------|--------|--------|--------|-------|-------|-------|-------|-------|-------|
| <b>1<sub>aq</sub></b> | 2.110      | 0,814 | -0,125 | -0,575 | 0,201 | -0,870 | -0,670 | -0,711 | 0,535 | 0,379 | 0,373 | 0,224 | 0,213 | 0,213 |
| <b>2<sub>aq</sub></b> | 7.545      | 0,812 | -0,137 | -0,585 | 0,204 | -0,898 | -0,671 | -0,709 | 0,520 | 0,403 | 0,390 | 0,242 | 0,210 | 0,220 |
| <b>3<sub>aq</sub></b> | 2.686      | 0,814 | -0,121 | -0,576 | 0,203 | -0,870 | -0,674 | -0,710 | 0,537 | 0,380 | 0,374 | 0,219 | 0,214 | 0,211 |
| <b>4<sub>aq</sub></b> | 4.823      | 0,809 | -0,130 | -0,577 | 0,205 | -0,867 | -0,662 | -0,711 | 0,537 | 0,380 | 0,375 | 0,217 | 0,215 | 0,210 |

**Table S-6.** Optimized bond lengths, bond angles and dihedral angles for selected alanine conformers **1-4** in water [B3LYP level with 6-311++G(d,p)]. CPCM model

| Conformer             | Rel. Energy | Bond lengths [Å] |       |       |       |       |       |       |       | Angle [°] |         | Dihedral angles [°] |  |
|-----------------------|-------------|------------------|-------|-------|-------|-------|-------|-------|-------|-----------|---------|---------------------|--|
|                       |             | 5,8              | 6,9   | 7,9   | 6,10  | 7,10  | 7,8   | 5,9   | 5,10  | 9,5,10    | 9,5,2,1 | 5,2,1,6*            |  |
| <b>1<sub>aq</sub></b> | 0.00        | -                | 2.914 | -     | 2.716 | -     | 0.993 | 1.021 | 1.021 | 106.53    | -58.78  | -19.84              |  |
| <b>2<sub>aq</sub></b> | 1.69        | 1.862            | -     | -     | -     | -     | 0.996 | 1.020 | 1.019 | 107.53    | -99.23  | 169.72              |  |
| <b>3<sub>aq</sub></b> | 0.73        | -                | -     | 3.018 | -     | 2.598 | 0.993 | 1.021 | 1.020 | 106.98    | -57.07  | 140.27              |  |
| <b>4<sub>aq</sub></b> | 2.56        | -                | 3.042 | -     | 2.685 | -     | 0.989 | 1.021 | 1.021 | 106.75    | -59.76  | -35.18              |  |

\* atom numbers according to Fig. 3

**Table S-7.** Dipole moments and NBO charges of 3-fluoroalanine conformers **1Fa<sub>aq</sub>**-**4Fc<sub>aq</sub>** in water obtained with CPCM model [B3LYP 6-311++G(d,p)].

| Conform.                               | Dipole [D] | C1    | C2     | C3    | Fa (H4)* | N5     | O6     | O7     | H8    | H9    | H10   | H11   | Fb (H12)* | Fc (H13)* |
|----------------------------------------|------------|-------|--------|-------|----------|--------|--------|--------|-------|-------|-------|-------|-----------|-----------|
| <b>1Fa<sub>aq</sub></b>                | 3,886      | 0,815 | -0,171 | 0,087 | -0,426   | -0,870 | -0,655 | -0,709 | 0,539 | 0,385 | 0,379 | 0,254 | 0,185     | 0,188     |
| <b>1Fb-1<sub>aq</sub></b>              | 3,302      | 0,824 | -0,163 | 0,087 | 0,179    | -0,879 | -0,648 | -0,705 | 0,542 | 0,383 | 0,386 | 0,227 | -0,423    | 0,189     |
| <b>1Fb-2<sub>aq</sub></b>              | 2,907      | 0,820 | -0,165 | 0,079 | 0,176    | -0,869 | -0,646 | -0,704 | 0,541 | 0,384 | 0,379 | 0,241 | -0,422    | 0,186     |
| <b>1Fb-3<sub>aq</sub></b>              | 3,749      | 0,811 | -0,165 | 0,089 | 0,177    | -0,867 | -0,652 | -0,707 | 0,540 | 0,384 | 0,378 | 0,244 | -0,419    | 0,187     |
| <b>1Fc<sub>aq</sub></b>                | 2,814      | 0,811 | -0,158 | 0,091 | 0,177    | -0,864 | -0,665 | -0,697 | 0,537 | 0,389 | 0,381 | 0,231 | 0,185     | -0,419    |
| <b>2Fa-1<sub>aq</sub></b>              | 7,904      | 0,813 | -0,183 | 0,079 | -0,423   | -0,896 | -0,660 | -0,699 | 0,523 | 0,406 | 0,396 | 0,267 | 0,185     | 0,193     |
| <b>2Fa-2<sub>aq</sub><sup>a)</sup></b> | 5,521      | 0,812 | -0,179 | 0,088 | -0,425   | -0,885 | -0,657 | -0,694 | 0,526 | 0,394 | 0,386 | 0,259 | 0,186     | 0,190     |
| <b>2Fa-3<sub>aq</sub><sup>a)</sup></b> | 5,550      | 0,812 | -0,180 | 0,088 | -0,425   | -0,885 | -0,657 | -0,694 | 0,526 | 0,394 | 0,386 | 0,260 | 0,186     | 0,190     |
| <b>2Fb<sub>aq</sub></b>                | 5,306      | 0,816 | -0,178 | 0,081 | 0,178    | -0,894 | -0,659 | -0,699 | 0,523 | 0,406 | 0,395 | 0,257 | -0,420    | 0,193     |
| <b>2Fc<sub>aq</sub></b>                | 8,634      | 0,813 | -0,177 | 0,080 | 0,181    | -0,889 | -0,652 | -0,701 | 0,524 | 0,404 | 0,393 | 0,257 | 0,182     | -0,416    |
| <b>3Fa<sub>aq</sub></b>                | 3,007      | 0,815 | -0,170 | 0,088 | -0,426   | -0,871 | -0,669 | -0,698 | 0,540 | 0,385 | 0,380 | 0,254 | 0,185     | 0,188     |
| <b>3Fb-1<sub>aq</sub></b>              | 3,567      | 0,828 | -0,161 | 0,088 | 0,179    | -0,879 | -0,657 | -0,701 | 0,543 | 0,382 | 0,386 | 0,227 | -0,424    | 0,190     |
| <b>3Fb-2<sub>aq</sub></b>              | 2,932      | 0,820 | -0,161 | 0,081 | 0,176    | -0,871 | -0,660 | -0,694 | 0,542 | 0,384 | 0,378 | 0,240 | -0,421    | 0,185     |
| <b>3Fb-3<sub>aq</sub></b>              | 4,366      | 0,810 | -0,160 | 0,088 | 0,180    | -0,858 | -0,661 | -0,702 | 0,538 | 0,386 | 0,379 | 0,236 | -0,421    | 0,183     |
| <b>3Fb-4<sub>aq</sub></b>              | 4,468      | 0,809 | -0,157 | 0,087 | 0,181    | -0,862 | -0,653 | -0,710 | 0,541 | 0,386 | 0,379 | 0,233 | -0,418    | 0,183     |
| <b>3Fb-5<sub>aq</sub></b>              | 4,885      | 0,812 | -0,165 | 0,091 | 0,176    | -0,868 | -0,667 | -0,697 | 0,541 | 0,385 | 0,378 | 0,246 | -0,420    | 0,188     |
| <b>3Fc<sub>aq</sub></b>                | 4,144      | 0,811 | -0,157 | 0,088 | 0,180    | -0,861 | -0,657 | -0,711 | 0,541 | 0,391 | 0,381 | 0,231 | 0,184     | -0,420    |
| <b>4Fa<sub>aq</sub></b>                | 6,837      | 0,809 | -0,176 | 0,086 | -0,423   | -0,868 | -0,645 | -0,709 | 0,538 | 0,386 | 0,382 | 0,248 | 0,189     | 0,184     |
| <b>4Fb<sub>aq</sub></b>                | 3,461      | 0,804 | -0,168 | 0,088 | 0,181    | -0,865 | -0,646 | -0,704 | 0,541 | 0,385 | 0,380 | 0,235 | -0,416    | 0,183     |
| <b>4Fc<sub>aq</sub></b>                | 5,132      | 0,807 | -0,166 | 0,091 | 0,179    | -0,864 | -0,655 | -0,700 | 0,540 | 0,390 | 0,382 | 0,229 | 0,187     | -0,419    |

\* according to Figure 3C; <sup>a)</sup> upon optimization conformer **2Fa-2<sub>aq</sub>** gives conformer **2Fa-3<sub>aq</sub>**

**Table S-8.** Bond lengths, bond angles and dihedral angles of 3-fluoroalanine conformers **1Fa<sub>aq</sub>**-**4Fc<sub>aq</sub>** in water obtained with the CPCM model [B3LYP 6-311++G(d,p)].

| Conformer                              | E <sub>rel</sub><br>[kcal/mol] | Bond lengths [Å] |       |       |       |         |       |       |       | Angle [°] |         | Dihedral angles [°] |          |  |
|----------------------------------------|--------------------------------|------------------|-------|-------|-------|---------|-------|-------|-------|-----------|---------|---------------------|----------|--|
|                                        |                                | 3,F              | 5,8   | 6,9   | 6,10  | F,(9)10 | 7,8   | 5,9   | 5,10  | 9,5,10    | F,3,2,5 | 9,5,2,1             | 5,2,1,6* |  |
| <b>1Fa<sub>aq</sub></b>                | 0.00                           | 1.420            | -     | 2.856 | 2.736 | 2.664   | 0.994 | 1.020 | 1.020 | 106.65    | 64.95   | -61.33              | -6.18    |  |
| <b>1Fb-1<sub>aq</sub></b>              | 1.44                           | 1.418            | -     | -     | 2.492 | -       | 0.995 | 1.020 | 1.020 | 106.94    | -62.12  | -167.21             | 12.40    |  |
| <b>1Fb-2<sub>aq</sub></b>              | 1.32                           | 1.415            | -     | -     | 2.683 | (2.593) | 0.994 | 1.020 | 1.022 | 107.54    | -59.42  | -177.37             | -15.79   |  |
| <b>1Fb-3<sub>aq</sub></b>              | 1.13                           | 1.412            | -     | 2.921 | 2.679 | -       | 0.994 | 1.020 | 1.021 | 106.90    | -66.62  | -65.59              | -8.19    |  |
| <b>1Fc<sub>aq</sub></b>                | 1.17                           | 1.415            | -     | 3.328 | 2.652 | -       | 0.995 | 1.021 | 1.021 | 107.40    | 178.62  | -71.70              | -49.30   |  |
| <b>2Fa-1<sub>aq</sub></b>              | 0.50                           | 1.418            | 1.888 | -     | -     | 2.516   | 0.994 | 1.019 | 1.021 | 108.28    | 58.02   | -140.87             | -170.87  |  |
| <b>2Fa-2<sub>aq</sub><sup>a)</sup></b> | 3.97                           | 1.420            | 2.392 | -     | -     | 2.621   | 0.982 | 1.020 | 1.021 | 109.75    | 63.81   | -61.68              | 172.66   |  |
| <b>2Fa-3<sub>aq</sub><sup>a)</sup></b> | 3.97                           | 1.420            | 2.389 | -     | -     | 2.620   | 0.982 | 1.020 | 1.021 | 109.78    | 63.60   | -62.20              | 173.68   |  |
| <b>2Fb<sub>aq</sub></b>                | 1.05                           | 1.413            | 1.883 | -     | -     | -       | 0.995 | 1.019 | 1.022 | 108.04    | -64.39  | -142.34             | -168.92  |  |
| <b>2Fc<sub>aq</sub></b>                | 2.67                           | 1.412            | 1.954 | -     | -     | -       | 0.989 | 1.020 | 1.023 | 108.09    | -161.94 | -151.76             | -160.73  |  |
|                                        |                                |                  | 6,8   | 7,9   | 7,10  |         |       |       |       |           |         |                     |          |  |
| <b>3Fa<sub>aq</sub></b>                | 0.82                           | 1.420            | 2.327 | 2.724 | 2.656 | 2.636   | 0.994 | 1.019 | 1.020 | 106.92    | 63.63   | -59.95              | 175.30   |  |
| <b>3Fb-1<sub>aq</sub></b>              | 2.19                           | 1.417            | 2.334 | -     | 2.417 | (2.522) | 0.995 | 1.021 | 1.020 | 106.30    | -63.29  | -175.32             | -144.91  |  |
| <b>3Fb-2<sub>aq</sub></b>              | 2.23                           | 1.413            | 2.331 | -     | 2.570 | (2.625) | 0.995 | 1.020 | 1.022 | 107.29    | -61.09  | -174.75             | 161.89   |  |
| <b>3Fb-3<sub>aq</sub></b>              | 2.00                           | 1.413            | 2.337 | 2.892 | -     | -       | 0.995 | 1.021 | 1.023 | 107.63    | -67.10  | -67.63              | -97.09   |  |
| <b>3Fb-4<sub>aq</sub></b>              | 2.14                           | 1.412            | 2.343 | -     | 2.658 | -       | 0.995 | 1.021 | 1.021 | 107.65    | -68.49  | -63.32              | 116.81   |  |
| <b>3Fb-5<sub>aq</sub></b>              | 2.03                           | 1.411            | 2.333 | 2.859 | 2.665 | -       | 0.994 | 1.020 | 1.021 | 107.18    | -67.10  | -63.16              | 164.28   |  |
| <b>3Fc<sub>aq</sub></b>                | 1.47                           | 1.415            | 2.340 | -     | 2.676 | -       | 0.994 | 1.020 | 1.021 | 107.70    | 178.91  | -67.89              | 111.37   |  |
|                                        |                                |                  | 4,8   | 6,9   | 6,10  |         |       |       |       |           |         |                     |          |  |
| <b>4Fa<sub>aq</sub></b>                | 3.07                           | 1.415            | -     | 2.934 | 2.660 | 2.647   | 0.990 | 1.020 | 1.020 | 106.77    | 64.02   | -62.60              | -22.60   |  |
| <b>4Fb<sub>aq</sub></b>                | 3.83                           | 1.409            | -     | 3.117 | 2.616 | -       | 0.991 | 1.021 | 1.021 | 107.21    | -68.14  | -67.05              | -33.29   |  |
| <b>4Fc<sub>aq</sub></b>                | 3.21                           | 1.412            | 2.583 | 3.761 | 2.585 | -       | 0.989 | 1.021 | 1.020 | 107.29    | -173.18 | -161.33             | -17.40   |  |

\* atom numbers according to Fig. 3; <sup>a)</sup> upon optimization conformer **2Fa-2<sub>aq</sub>** gives conformer **2Fa-3<sub>aq</sub>**

**Table S-9.** Structural parameters for alanine zwitterionic forms in water [CPCM, B3LYP 6-311++G(d,p)].

| Atom <sup>*)</sup> | Bond lengths [Å]   |                    | Atom <sup>*)</sup> | Bond angles [°]    |                    | Atom <sup>*)</sup> | Dihedral angles [°] |                    |
|--------------------|--------------------|--------------------|--------------------|--------------------|--------------------|--------------------|---------------------|--------------------|
|                    | zwAl <sub>aq</sub> | zwAr <sub>aq</sub> |                    | zwAl <sub>aq</sub> | zwAr <sub>aq</sub> |                    | zwAl <sub>aq</sub>  | zwAr <sub>aq</sub> |
| 1,2                | 1.559              | 1.555              | 2,1,6              | 115.963            | 115.487            | 8,5,2,1            | -25.859             | 41.318             |
| 2,5                | 1.511              | 1.511              | 2,1,7              | 115.735            | 116.055            | 10,5,2,1           | 90.585              | 163.673            |
| 1,6                | 1.247              | 1.249              | 5,2,1              | 107.524            | 107.843            | 5,2,1,6            | -171.134            | 163.043            |
| 1,7                | 1.259              | 1.257              | 6,1,7              | 128.266            | 128.437            | 5,2,1,7            | 10.840              | -18.513            |
| 5,8                | 1.035              | 1.033              | 8,5,2              | 106.559            | 108.486            | 8,5,1,6            | 170.603             | -170.678           |
| 5,9                | 1.029              | 1.030              | 8,5,9              | 110.319            | 106.426            | 8,5,1,7            | -16.016             | 22.725             |
| 5,10               | 1.030              | 1.030              | 8,5,10             | 106.668            | 109.938            | 11,2,1,7           | -102.079            | -134.331           |
| 2,11               | 1.096              | 1.093              | 9,5,2              | 112.924            | 110.956            | 10,5,1,7           | 86.499              | 134.529            |
| 7,8                | 2.013              | 2.187              | 10,5,2             | 112.294            | 113.270            | 9,5,2,1            | -147.130            | -75.254            |
| 7,10(9)            | 3.012              | (2.880)            | 11,2,1             | 106.887            | 109.800            | Ha,3,2,5           | 61.641              | 60.673             |
| Ha,3               | 1.094              | 1.094              | 3,2,1              | 114.986            | 111.643            | Ha,3,2,11          | 178.309             | 178.293            |
| Hb,3               | 1.093              | 1.094              | Ha,3,2             | 111.122            | 111.179            | Ha,3,5,10          | 22.124              | 92.318             |
| Hc,3               | 1.089              | 1.090              | Hb,3,2             | 111.282            | 111.269            | Ha,3,2,1           | -60.647             | -58.896            |
| Ha,10(8)           | 2.467              | (2.717)            | Hc,3,2             | 108.926            | 108.933            | Hb,3,2,5           | -59.748             | -60.763            |
| Hb,9(10)           | 2.856              | (2.470)            |                    |                    |                    | Hb,3,2,11          | 56.921              | 56.858             |
| Hc,11              | 2.499              | 2.507              |                    |                    |                    | Hb,3,5,10          | -86.787             | -16.579            |
| Hc,6               | 2.674              | 2.858              |                    |                    |                    | Hb,3,5,9           | 19.990              | 97.756             |
|                    |                    |                    |                    |                    |                    | Hb,3,2,1           | 177.965             | 179.668            |
|                    |                    |                    |                    |                    |                    | Hc,3,2,11          | -62.684             | -62.380            |
|                    |                    |                    |                    |                    |                    | Hc,3,2,1           | 58.360              | 60.430             |
|                    |                    |                    |                    |                    |                    | Hc,3,1,6           | 12.464              | -9.149             |

\*<sup>)</sup> The atomic numbering scheme is given in Fig. 3, with H8 at the amino group also in Fig. 11.

**Table S-10.** Dipole moments, NBO charges of alanine zwitterionic forms zwAr<sub>aq</sub> and zwAl<sub>aq</sub> in water, [B3LYP, 6-311++G(d,p)] CPCM model

| Conform.           | Dipole [D] | C1    | C2     | C3     | H4    | N5     | O6     | O7     | H8 (N) <sub>zw</sub> | H9    | H10   | H11   | H12   | H13   |
|--------------------|------------|-------|--------|--------|-------|--------|--------|--------|----------------------|-------|-------|-------|-------|-------|
| zwAr <sub>aq</sub> | 14,237     | 0,765 | -0,115 | -0,596 | 0,212 | -0,700 | -0,798 | -0,817 | 0,460                | 0,457 | 0,448 | 0,238 | 0,213 | 0,232 |
| zwAl <sub>aq</sub> | 14,064     | 0,769 | -0,119 | -0,597 | 0,209 | -0,703 | -0,793 | -0,818 | 0,465                | 0,453 | 0,446 | 0,242 | 0,212 | 0,235 |



**Table S-11.** Structural parameters for the 3-fluoroalanine zwitterionic form **zwAFa<sub>aq</sub>** position in aqueous media [CPCM, B3LYP 6-311++G(d,p)].

| Bond lengths [Å]   |       | Bond angles [°]    |         | Dihedral angles [°] |          |
|--------------------|-------|--------------------|---------|---------------------|----------|
| Atom <sup>*)</sup> |       | Atom <sup>*)</sup> |         | Atom <sup>*)</sup>  |          |
| 1,2                | 1.566 | 2,1,6              | 115.658 | 8,5,2,1             | -19.852  |
| 2,3                | 1.51  | 2,1,7              | 115.009 | 9,5,2,1             | -140.208 |
| 2,5                | 1.505 | 5,2,1              | 107.978 | 10,5,2,1            | 96.411   |
| 1,6                | 1.244 | 6,1,7              | 129.212 | 5,2,1,6             | -171.725 |
| 1,7                | 1.253 | 8,5,2              | 105.427 | 5,2,1,7             | 10.379   |
| 5,8                | 1.039 | 9,5,2              | 113.125 | 8,5,1,7             | -10.772  |
| 5,9                | 1.030 | 10,5,2             | 112.519 | 11,2,1,6            | 72.911   |
| 5,10               | 1.031 | 8,5,9              | 110.094 | 10,5,1,7            | 90.422   |
| 7,8                | 1.959 | 8,5,10             | 106.987 | F,3,2,5             | 60.394   |
| 2,11               | 1.098 | 3,2,1              | 114.357 | F,3,2,11            | 178.042  |
| F,3                | 1.416 | 11,2,1             | 107.383 | F,3,5,10            | 27.586   |
| F,10               | 2.457 | F,3,2              | 109.109 | F,3,2,1             | -62.263  |
| 12,3               | 1.093 | 12,3,2             | 112.440 | 12,3,2,5            | -57.854  |
| 13,3               | 1.089 | F,3,12             | 106.761 | 12,3,2,11           | 59.795   |
| 13,6               | 2.636 | 13,3,2             | 109.679 | 12,3,5,9            | 27.634   |
|                    |       |                    |         | 12,3,2,1            | 179.489  |
|                    |       |                    |         | 13,3,2,11           | -63.869  |
|                    |       |                    |         | 13,3,2,1            | 55.825   |
|                    |       |                    |         | 13,3,1,6            | 9.638    |

\*<sup>)</sup> The atomic numbering scheme is given in Fig. 3, with H8 at amino group, and Fig 9.

**Table S-12.** Structural parameters for the 3-fluoroalanine zwitterionic forms **zwAFbl<sub>aq</sub>** and **zwAFbr<sub>aq</sub>** position in water [CPCM, B3LYP 6-311++G(d,p)].

| Atom <sup>*)</sup> | Bond lengths [Å]     |                      | Bond angles [°]    |                      | Dihedral angles [°]  |                    |                      |                      |
|--------------------|----------------------|----------------------|--------------------|----------------------|----------------------|--------------------|----------------------|----------------------|
|                    | zwAFbl <sub>aq</sub> | zwAFbr <sub>aq</sub> | Atom <sup>*)</sup> | zwAFbl <sub>aq</sub> | zwAFbr <sub>aq</sub> | Atom <sup>*)</sup> | zwAFbl <sub>aq</sub> | zwAFbr <sub>aq</sub> |
| 1,2                | 1.566                | 1.565                | 2,1,6              | 115.655              | 114.964              | 8,5,2,1            | -149.610             | 158.731              |
| 2,5                | 1.504                | 1.504                | 2,1,7              | 115.040              | 115.559              | 9,5,2,1            | -28.597              | -80.649              |
| 1,6                | 1.246                | 1.247                | 5,2,1              | 108.328              | 108.848              | 10,5,2,1           | 87.900               | 36.042               |
| 1,7                | 1.254                | 1.253                | 6,1,7              | 129.278              | 129.464              | 5,2,1,6            | -167.877             | 168.248              |
| 5,8                | 1.030                | 1.031                | 8,5,2              | 112.887              | 113.131              | 5,2,1,7            | 13.838               | -12.950              |
| 5,9                | 1.036                | 1.031                | 9,5,2              | 106.461              | 110.716              | 9,5,1,7            | -15.848              | -81.998              |
| 5,10               | 1.032                | 1.034                | 10,5,2             | 112.518              | 108.617              | 11,2,1,6           | 77.511               | 50.724               |
| 7,9                | 2.044                | 2.92                 | 8,5,9              | 110.183              | 107.406              | 10,5,1,7           | 87.182               | 22.873               |
| 7,10               |                      | 1.166                | 8,5,10             | 107.951              | 110.199              | 4,3,2,5            | 56.763               | 56.539               |
| 2,11               | 1.097                | 1.094                | 3,2,1              | 113.161              | 110.253              | 4,3,2,11           | 174.271              | 174.810              |
| 4,3                | 1.094                | 1.094                | 11,2,1             | 107.589              | 110.071              | 4,3,5,10           | 16.651               | -24.512              |
| 4,10               | 2.436                | 2.753                | 4,3,2              | 112.308              | 112.375              | 4,3,2,1            | -65.499              | -63.541              |
| F,3                | 1.417                | 1.415                | F,3,2              | 109.411              | 109.486              | F,3,2,5            | -61.607              | -61.920              |
| F,10               | 2.984                | -                    | F,3,4              | 106.766              | 106.764              | F,3,2,11           | 55.901               | 56.351               |
| F,8                | 2.860                | 2.476                | 13,3,2             | 109.917              | 109.721              | F,3,5,10           | -90.162              | -131.309             |
| 13,3               | 1.088                | 1.089                |                    |                      |                      | F,3,5,8            | 16.888               | -21.803              |
| 13,6               | 2.605                | 2.759                |                    |                      |                      | F,3,2,1            | 176.131              | 178.000              |
|                    |                      |                      |                    |                      |                      | 13,3,2,11          | -62.502              | -61.844              |
|                    |                      |                      |                    |                      |                      | 13,3,2,1           | 57.728               | 59.804               |
|                    |                      |                      |                    |                      |                      | 13,3,1,6           | 13.897               | -6.193               |

\*<sup>)</sup> The atomic numbering scheme is given in Fig. 3, with H8 at amino group, and Fig 9 (for left and right structures).

**Table S-13.** Structural parameters for the 3-fluoroalanine zwitterionic forms **zwAFcl<sub>aq</sub>** and **zwAFcr<sub>aq</sub>** in water [CPCM, B3LYP 6-311++G(d,p)].

| Bond lengths [Å]   |                            |                            | Bond angles [°]    |                            |                            | Dihedral angles [°] |                            |                            |
|--------------------|----------------------------|----------------------------|--------------------|----------------------------|----------------------------|---------------------|----------------------------|----------------------------|
| Atom <sup>*)</sup> | <b>zwAFcl<sub>aq</sub></b> | <b>zwAFcr<sub>aq</sub></b> | Atom <sup>*)</sup> | <b>zwAFcl<sub>aq</sub></b> | <b>zwAFcr<sub>aq</sub></b> | Atom <sup>*)</sup>  | <b>zwAFcl<sub>aq</sub></b> | <b>zwAFcr<sub>aq</sub></b> |
| 1,2                | 1.561                      | 1.561                      | 2,1,6              | 116.040                    | 116.330                    | 8,5,2,1             | -149.946                   | 161.184                    |
| 2,5                | 1.504                      | 1.503                      | 2,1,7              | 114.972                    | 114.641                    | 9,5,2,1             | -29.047                    | -77.966                    |
| 1,6                | 1.245                      | 1.246                      | 5,2,1              | 107.684                    | 107.410                    | 10,5,2,1            | 87.079                     | 38.531                     |
| 1,7                | 1.257                      | 1.257                      | 6,1,7              | 128.963                    | 129.016                    | 5,2,1,6             | -162.692                   | 152.327                    |
| 5,8                | 1.031                      | 1.032                      | 8,5,2              | 113.108                    | 114.096                    | 5,2,1,7             | 18.924                     | -28.881                    |
| 5,9                | 1.037                      | 1.032                      | 9,5,2              | 105.809                    | 110.480                    | 9,5,1,7             | -11.889                    | -94.437                    |
| 5,10               | 1.032                      | 1.036                      | 10,5,2             | 112.823                    | 107.863                    | 10,5,1,7            | 90.923                     | 11.023                     |
| 7,9                | 2.014                      | 2.992                      | 8,5,9              | 110.337                    | 107.198                    | 11,2,1,6            | 83.232                     | 34.276                     |
| 7,10               | 3.032                      | 2.128                      | 8,5,10             | 108.009                    | 110.093                    | 4,3,2,5             | 93.160                     | 66.123                     |
| 2,11               | 1.097                      | 1.093                      | 3,2,1              | 115.787                    | 112.079                    | 4,3,2,11            | -150.764                   | -176.348                   |
| 4,3                | 1.091                      | 1.094                      | 11,2,1             | 107.626                    | 111.353                    | 4,3,5,10            | 42.691                     | -14.679                    |
| 4,10               | 2.877                      | 2.726                      | 4,3,2              | 112.169                    | 111.556                    | 4,3,2,1             | -29.747                    | -51.778                    |
| 12,3               | 1.094                      | 1.095                      | 12,3,2             | 111.173                    | 110.926                    | 12,3,2,5            | -30.759                    | -56.897                    |
| 12,10              | 2.515                      | -                          | F,3,2              | 108.938                    | 109.035                    | 12,3,2,11           | 85.317                     | 60.632                     |
| 12,8               | 2.691                      | 2.368                      | F,3,4              | 107.333                    | 107.773                    | 12,3,5,8            | 41.673                     | -15.143                    |
| F,3                | 1.405                      | 1.400                      | F,3,12             | 106.780                    | 107.397                    | 12,3,5,10           | -65.704                    | -124.711                   |
| F,11               | 2.436                      | 2.632                      | 12,3,4             | 111.173                    | 110.009                    | 12,3,2,1            | -153.666                   | -174.808                   |
| F,6                | 3.153                      | 3.131                      |                    |                            |                            | F,3,2,5             | -148.160                   | -174.964                   |
|                    |                            |                            |                    |                            |                            | F,3,2,11            | -32.084                    | -57.435                    |
|                    |                            |                            |                    |                            |                            | F,3,2,1             | 88.933                     | 67.125                     |
|                    |                            |                            |                    |                            |                            | F,3,1,6             | 44.923                     | -13.618                    |

<sup>\*)</sup> The atomic numbering scheme is given in Fig. 3 with H8 at amino group and Fig 9 (for left right structures).

**Table S-14.** Dipole moments and NBO charges of 3-fluoroalanine zwitterionic forms **zwAFa<sub>aq</sub>** to **zwAFcr<sub>aq</sub>** in water, [B3LYP, 6-311++G(d,p)] CPCM model

| Conformer                  | Dipole [D] | C1    | C2     | C3    | Fa (H4)* | N5     | O6     | O7     | H8 (-N) <sub>zw</sub> | H9    | H10   | H11   | Fb (H12)* | Fc (H13)* |
|----------------------------|------------|-------|--------|-------|----------|--------|--------|--------|-----------------------|-------|-------|-------|-----------|-----------|
| <b>zwAFa<sub>aq</sub></b>  | 14,203     | 0,774 | -0,169 | 0,067 | -0,418   | -0,708 | -0,805 | -0,783 | 0,467                 | 0,458 | 0,452 | 0,267 | 0,189     | 0,208     |
| <b>zwAFbl<sub>aq</sub></b> | 11,672     | 0,773 | -0,163 | 0,067 | 0,186    | -0,704 | -0,800 | -0,783 | 0,468                 | 0,459 | 0,452 | 0,257 | -0,418    | 0,208     |
| <b>zwAFbr<sub>aq</sub></b> | 11,872     | 0,767 | -0,160 | 0,066 | 0,188    | -0,702 | -0,799 | -0,785 | 0,464                 | 0,462 | 0,454 | 0,253 | -0,416    | 0,206     |
| <b>zwAFcl<sub>aq</sub></b> | 14,766     | 0,770 | -0,162 | 0,076 | 0,192    | -0,703 | -0,809 | -0,780 | 0,470                 | 0,459 | 0,452 | 0,261 | 0,183     | -0,407    |
| <b>zwAFcr<sub>aq</sub></b> | 15,559     | 0,761 | -0,150 | 0,077 | 0,186    | -0,703 | -0,811 | -0,779 | 0,466                 | 0,465 | 0,455 | 0,248 | 0,185     | -0,399    |

\* according to Figure 3C

**Table S-15.** Structural parameters for protonated alanine conformers in the gas phase.

| Confor    | E <sub>rel</sub><br>[kcal/mol] | Bond lengths [Å] |       |       |       |       |       |       |       | Angle [°] |          | Dihedral angles [°] |              |  |
|-----------|--------------------------------|------------------|-------|-------|-------|-------|-------|-------|-------|-----------|----------|---------------------|--------------|--|
|           |                                | 6(7),9[10]*      | 6,8   | 1,6   | 1,7   | 7,8   | 5,9   | 5,10  | 5,14  | 6,1,7     | 14,5,2,1 | 9,5,1,6(7)*         | 10,5,1,6(7)* |  |
| <b>p1</b> | 0.00                           | 1.911            | 2.381 | 1.208 | 1.319 | 0.973 | 1.041 | 1.024 | 1.022 | 126.803   | -128.113 | -6.068              | 93.221       |  |
| <b>p3</b> | 2.58                           | 2.222            | 2.386 | 1.190 | 1.352 | 0.973 | 1.026 | 1.025 | 1.024 | 126.139   | -168.470 | -29.089             | 77.442       |  |
| <b>p4</b> | 8.94                           | 1.854            | -     | 1.204 | 1.321 | 0.967 | 1.046 | 1.022 | 1.023 | 122.498   | -102.726 | -94.064             | 5.671        |  |

\* The notation (7) is used for conformer **p3** and [10] for conformer **p4** (Figure 11).

**Table S-16.** Dipole moments and NBO charges of protonated alanine conformers **p1**, **p3** and **p4** in the gas phase [6-311++G(d,p)].

| Conform.  | Dipole [D] | C1    | C2     | C3     | H4    | N5     | O6     | O7     | H8    | H9    | H10   | H11   | H12   | H13   | H14 (-N+) |
|-----------|------------|-------|--------|--------|-------|--------|--------|--------|-------|-------|-------|-------|-------|-------|-----------|
| <b>p1</b> | 4,950      | 0,798 | -0,104 | -0,604 | 0,225 | -0,696 | -0,584 | -0,639 | 0,516 | 0,466 | 0,438 | 0,250 | 0,231 | 0,262 | 0,441     |
| <b>p3</b> | 7,136      | 0,781 | -0,102 | -0,607 | 0,224 | -0,681 | -0,506 | -0,716 | 0,523 | 0,458 | 0,440 | 0,250 | 0,227 | 0,271 | 0,440     |
| <b>p4</b> | 7,277      | 0,794 | -0,119 | -0,606 | 0,235 | -0,699 | -0,555 | -0,610 | 0,494 | 0,442 | 0,468 | 0,239 | 0,235 | 0,244 | 0,439     |

**Table S-17.** Relative Energies and structural parameters for protonated alanine conformers in water (CPCM-Model)

| Conformer              | rel. Energy [kcal/mol] | Bond lengths [Å] |          |       |       |       |       |       |       |       |  |
|------------------------|------------------------|------------------|----------|-------|-------|-------|-------|-------|-------|-------|--|
|                        |                        | 6(7),9*          | 6(7),10* | 6,8   | 1,6   | 1,7   | 7,8   | 5,9   | 5,10  | 5,14  |  |
| <b>p1<sub>aq</sub></b> | 0.00                   | 2.578            | 2.647    | 2.369 | 1.211 | 1.324 | 0.998 | 1.034 | 1.034 | 1.033 |  |
| <b>p3<sub>aq</sub></b> | 1.47                   | 2.478            | 2.578    | 2.377 | 1.207 | 1.330 | 0.999 | 1.033 | 1.034 | 1.034 |  |
| <b>p4<sub>aq</sub></b> | 4.03                   | 2.831            | 2.444    | -     | 1.209 | 1.327 | 0.995 | 1.034 | 1.034 | 1.034 |  |

  

|                        | Angle [°]  |         |         | Dihedral angles [°] |             |              |
|------------------------|------------|---------|---------|---------------------|-------------|--------------|
|                        | 9,6(7),10* | 6,1,7   | 9,5,10  | 14,5,2,1            | 9,5,1,6(7)* | 10,5,1,6(7)* |
| <b>p1<sub>aq</sub></b> | 37.029     | 125.722 | 106.844 | -175.476            | -53.684     | 53.125       |
| <b>p3<sub>aq</sub></b> | 38.348     | 125.547 | 107.147 | -176.081            | -50.953     | 56.322       |
| <b>p4<sub>aq</sub></b> | 35.808     | 121.243 | 107.012 | 176.076             | -77.804     | 29.155       |

\* The notation (7) is used for conformer **p3** (Figure 11).

**Table S-18.** Dipole moments and NBO charges of protonated alanine conformers **p1<sub>aq</sub>**, **p3<sub>aq</sub>** and **p4<sub>aq</sub>** in water

| Conf.                  | Dipole [D] | C1    | C2     | C3     | H4    | N5     | O6     | O7     | H8    | H9    | H10   | H11   | H12   | H13   | H14 (-N+) |
|------------------------|------------|-------|--------|--------|-------|--------|--------|--------|-------|-------|-------|-------|-------|-------|-----------|
| <b>p1<sub>aq</sub></b> | 6,512      | 0,813 | -0,114 | -0,596 | 0,220 | -0,695 | -0,635 | -0,686 | 0,553 | 0,470 | 0,463 | 0,272 | 0,226 | 0,242 | 0,466     |
| <b>p3<sub>aq</sub></b> | 9,250      | 0,816 | -0,113 | -0,595 | 0,220 | -0,698 | -0,625 | -0,703 | 0,559 | 0,471 | 0,463 | 0,273 | 0,225 | 0,242 | 0,466     |
| <b>p4<sub>aq</sub></b> | 10,017     | 0,809 | -0,122 | -0,597 | 0,224 | -0,696 | -0,626 | -0,682 | 0,551 | 0,470 | 0,466 | 0,268 | 0,230 | 0,238 | 0,466     |

**Table S-19.** Structural parameters and relative energy (kcal/mol) for protonated 3-fluoroalanine conformers in the gas phase

| Conformer   | Relative energy | Bond lengths [Å] |       |         |         |       |       |       | Angle [°] |         | Dihedral angles [°] |            |             |  |
|-------------|-----------------|------------------|-------|---------|---------|-------|-------|-------|-----------|---------|---------------------|------------|-------------|--|
|             |                 | 1,6              | 1,7   | 6(7),9  | 6(7),10 | 5,9   | 5,10  | 5,14  | 6,1,7     | 9,5,2,1 | 10,5,2,1            | 9,5,1,6(7) | 10,5,1,6(7) |  |
| <b>p1Fa</b> | 0.00            | 1.204            | 1.319 | 1.979   | -       | 1.038 | 1.029 | 1.022 | 127.469   | -19.738 | 95.938              | -11.108    | 91.146      |  |
| <b>p1Fb</b> | 0.37            | 1.204            | 1.321 | 3.035   | 2.102   | 1.024 | 1.034 | 1.028 | 127.618   | -90.478 | 27.219              | -85.864    | 17.580      |  |
| <b>p1Fc</b> | 7.02            | 1.209            | 1.313 | 3.110   | 1.915   | 1.024 | 1.044 | 1.024 | 127.490   | -99.369 | 17.626              | -95.301    | 5.816       |  |
| <b>p3Fa</b> | 2.59            | 1.190            | 1.347 | (2.136) | (2.908) | 1.027 | 1.029 | 1.024 | 126.852   | -36.803 | 81.320              | -19.390    | 87.345      |  |
| <b>p3Fb</b> | 2.94            | 1.191            | 1.346 | (2.571) | (2.487) | 1.024 | 1.025 | 1.028 | 127.014   | -66.236 | 53.242              | -52.758    | 54.138      |  |
| <b>p3Fc</b> | 9.97            | 1.188            | 1.355 | (2.957) | (2.202) | 1.025 | 1.029 | 1.026 | 126.773   | -70.188 | 48.068              | -95.754    | 10.872      |  |
| <b>p4Fa</b> | 10.71           | 1.202            | 1.320 | 1.866   | -       | 1.044 | 1.028 | 1.022 | 122.717   | -15.440 | 99.521              | -9.202     | 91.089      |  |
| <b>p4Fb</b> | 10.09           | 1.201            | 1.323 | 3.033   | 2.013   | 1.024 | 1.037 | 1.027 | 123.080   | -90.068 | 27.190              | -91.305    | 11.949      |  |
| <b>p4Fc</b> | 12.20           | 1.207            | 1.311 | -       | 1.795   | 1.024 | 1.054 | 1.023 | 123.629   | -10.188 | 106.279             | -4.324     | 93.456      |  |

\* The notation (7) is used for fluorine conformers correspond to **p3** (Figure 11).

**Table S-20.** Dipole moments and NBO charges of protonated 3-fluoroalanine conformers in the gas phase

| Conf. | Dipole,<br>D | C1    | C2     | C3    | Fa<br>(H4)* | N5     | O6     | O7     | H8    | H9    | H10   | H11   | Fb<br>(H12)* | Fc<br>(H13)* | H14<br>(N+) |
|-------|--------------|-------|--------|-------|-------------|--------|--------|--------|-------|-------|-------|-------|--------------|--------------|-------------|
| p1Fa  | 5,155        | 0,797 | -0,146 | 0,069 | -0,377      | -0,696 | -0,570 | -0,643 | 0,520 | 0,468 | 0,453 | 0,264 | 0,194        | 0,225        | 0,442       |
| p1Fb  | 3,047        | 0,787 | -0,142 | 0,073 | 0,192       | -0,690 | -0,567 | -0,641 | 0,518 | 0,446 | 0,462 | 0,258 | -0,373       | 0,221        | 0,454       |
| p1Fc  | 6,814        | 0,792 | -0,140 | 0,085 | 0,189       | -0,696 | -0,584 | -0,619 | 0,516 | 0,447 | 0,469 | 0,259 | 0,184        | -0,341       | 0,439       |
| p3Fa  | 7,093        | 0,785 | -0,145 | 0,068 | -0,379      | -0,689 | -0,504 | -0,710 | 0,527 | 0,463 | 0,456 | 0,264 | 0,192        | 0,232        | 0,442       |
| p3Fb  | 5,858        | 0,777 | -0,141 | 0,073 | 0,190       | -0,682 | -0,504 | -0,703 | 0,524 | 0,452 | 0,447 | 0,260 | -0,377       | 0,228        | 0,456       |
| p3Fc  | 9,476        | 0,770 | -0,134 | 0,082 | 0,188       | -0,683 | -0,478 | -0,722 | 0,525 | 0,450 | 0,461 | 0,258 | 0,183        | -0,340       | 0,441       |
| p4Fa  | 7,216        | 0,796 | -0,160 | 0,067 | -0,368      | -0,700 | -0,545 | -0,606 | 0,492 | 0,472 | 0,451 | 0,259 | 0,201        | 0,199        | 0,443       |
| p4Fb  | 4,528        | 0,783 | -0,155 | 0,070 | 0,200       | -0,693 | -0,541 | -0,610 | 0,495 | 0,446 | 0,467 | 0,245 | -0,369       | 0,210        | 0,454       |
| p4Fc  | 8,018        | 0,796 | -0,158 | 0,070 | 0,195       | -0,702 | -0,558 | -0,606 | 0,512 | 0,473 | 0,438 | 0,257 | 0,201        | -0,364       | 0,446       |

\* according to Figure 3C

**Table S-21.** Relative energy (kcal/mol) and structural parameters for protonated 3-fluoroalanine conformers in water (CPCM-model)

| Conf.              | Relative<br>energy | Bond lengths [Å] |       |         |         |       |       | Angle [°] |         |         | Dihedral angles [°] |            |             |
|--------------------|--------------------|------------------|-------|---------|---------|-------|-------|-----------|---------|---------|---------------------|------------|-------------|
|                    |                    | 1,6              | 1,7   | 6(7),9  | 6(7),10 | 5,9   | 5,10  | 5,14      | 6,1,7   | 9,5,2,1 | 10,5,2,1            | 9,5,1,6(7) | 10,5,1,6(7) |
| p1Fa <sub>aq</sub> | 0.00               | 1.208            | 1.322 | 2.514   | 2.716   | 1.034 | 1.035 | 1.035     | 126.406 | -53.403 | 66.020              | -46.776    | 59.983      |
| p1Fb <sub>aq</sub> | 0.70               | 1.208            | 1.322 | 2.578   | 2.672   | 1.034 | 1.035 | 1.034     | 126.476 | -57.922 | 61.781              | -50.153    | 56.876      |
| p1Fc <sub>aq</sub> | 3.37               | 1.210            | 1.321 | 2.613   | 2.595   | 1.035 | 1.036 | 1.035     | 126.165 | -57.323 | 61.798              | -58.953    | 47.652      |
| p3Fa <sub>aq</sub> | 1.29               | 1.205            | 1.326 | (2.464) | (2.619) | 1.034 | 1.034 | 1.035     | 126.259 | -55.991 | 64.291              | -48.147    | 59.174      |
| p3Fb <sub>aq</sub> | 2.02               | 1.206            | 1.326 | (2.475) | (2.625) | 1.034 | 1.035 | 1.035     | 126.295 | -59.381 | 61.114              | -45.515    | 61.964      |
| p3Fc <sub>aq</sub> | 4.47               | 1.205            | 1.329 | (2.722) | (2.451) | 1.035 | 1.035 | 1.036     | 126.095 | -57.941 | 62.160              | -76.367    | 30.776      |
| p4Fa <sub>aq</sub> | 4.52               | 1.207            | 1.326 | 2.704   | 2.513   | 1.035 | 1.035 | 1.035     | 121.660 | -59.860 | 59.545              | -68.050    | 38.942      |
| p4Fb <sub>aq</sub> | 5.20               | 1.207            | 1.324 | 2.883   | 2.435   | 1.035 | 1.035 | 1.035     | 121.912 | -66.652 | 52.968              | -80.800    | 26.326      |
| p4Fc <sub>aq</sub> | 6.53               | 1.208            | 1.323 | 2.863   | 2.428   | 1.036 | 1.036 | 1.036     | 121.753 | -65.663 | 53.442              | -80.916    | 25.949      |

\* The notation (7) is used for 3-fluoroalanine cation corresponding to conformer **p3** (Figure 12).

**Table S-22.** Dipole moments and NBO charges of protonated 3-fluoroalanine conformers in water

| Conf.              | Dipole<br>[D] | C1    | C2     | C3    | Fa<br>(H4)* | N5     | O6     | O7     | H8    | H9    | H10   | H11   | Fb<br>(H12)* | Fc<br>(H13)* | H14-<br>(N+) |
|--------------------|---------------|-------|--------|-------|-------------|--------|--------|--------|-------|-------|-------|-------|--------------|--------------|--------------|
| p1Fa <sub>aq</sub> | 7,692         | 0,815 | -0,159 | 0,068 | -0,404      | -0,698 | -0,624 | -0,684 | 0,557 | 0,475 | 0,468 | 0,297 | 0,202        | 0,215        | 0,471        |
| p1Fb <sub>aq</sub> | 4,074         | 0,813 | -0,154 | 0,070 | 0,197       | -0,697 | -0,620 | -0,683 | 0,558 | 0,475 | 0,468 | 0,286 | -0,400       | 0,215        | 0,471        |
| p1Fc <sub>aq</sub> | 8,620         | 0,810 | -0,151 | 0,077 | 0,197       | -0,696 | -0,628 | -0,677 | 0,554 | 0,477 | 0,472 | 0,285 | 0,197        | -0,386       | 0,470        |
| p3Fa <sub>aq</sub> | 9,921         | 0,817 | -0,159 | 0,070 | -0,404      | -0,700 | -0,616 | -0,698 | 0,562 | 0,475 | 0,469 | 0,297 | 0,202        | 0,215        | 0,471        |
| p3Fb <sub>aq</sub> | 8,348         | 0,816 | -0,154 | 0,071 | 0,197       | -0,699 | -0,614 | -0,696 | 0,562 | 0,475 | 0,468 | 0,287 | -0,400       | 0,215        | 0,471        |
| p3Fc <sub>aq</sub> | 12,306        | 0,808 | -0,146 | 0,078 | 0,196       | -0,699 | -0,606 | -0,703 | 0,561 | 0,477 | 0,471 | 0,280 | 0,199        | -0,388       | 0,473        |
| p4Fa <sub>aq</sub> | 11,377        | 0,809 | -0,167 | 0,067 | -0,399      | -0,698 | -0,614 | -0,679 | 0,552 | 0,475 | 0,471 | 0,294 | 0,206        | 0,211        | 0,472        |
| p4Fb <sub>aq</sub> | 6,659         | 0,805 | -0,161 | 0,069 | 0,201       | -0,699 | -0,611 | -0,673 | 0,554 | 0,475 | 0,471 | 0,281 | -0,395       | 0,211        | 0,472        |
| p4Fc <sub>aq</sub> | 11,462        | 0,805 | -0,157 | 0,076 | 0,198       | -0,698 | -0,620 | -0,672 | 0,554 | 0,478 | 0,472 | 0,278 | 0,202        | -0,389       | 0,473        |

\* according to Figure 3C

**Table S-23.** Structural parameters for the alanine anion conformers in the gas phase

| Conformer | rel. energy<br>[kcal/mol] | Bond lengths [Å] |       |       |       |       |       | Angle [°] |       |         | Dihedral angles [°] |          |         |
|-----------|---------------------------|------------------|-------|-------|-------|-------|-------|-----------|-------|---------|---------------------|----------|---------|
|           |                           | 1,6              | 1,7   | 5,9   | 5,10  | 6,11  | 6,13  | 7,9       | 7,10  | 9,5,10  | 6,1,7               | 10,5,1,7 | 9,5,1,7 |
| a1r       | 0.00                      | 1.253            | 1.258 | 1.017 | 1.023 | 2.550 | 2.833 | 3.048     | 2.206 | 103.451 | 129.050             | 11.781   | -90.133 |
| a1l       | 0.26                      | 1.253            | 1.257 | 1.023 | 1.019 | 2.703 | 2.567 | 2.140     | 3.080 | 103.711 | 128.919             | 82.024   | -14.116 |

**Table S-24.** Dipole moments and NBO charges of alanine anion conformers in the gas phase

| Conf.      | Dipole [D] | C1    | C2     | C3     | H4    | N5     | O6     | O7     | H9    | H10   | H11   | H12   | H13   |
|------------|------------|-------|--------|--------|-------|--------|--------|--------|-------|-------|-------|-------|-------|
| <b>a1r</b> | 4,576      | 0,743 | -0,122 | -0,572 | 0,186 | -0,881 | -0,789 | -0,804 | 0,331 | 0,367 | 0,165 | 0,176 | 0,200 |
| <b>a1l</b> | 4,944      | 0,747 | -0,124 | -0,581 | 0,175 | -0,879 | -0,792 | -0,801 | 0,374 | 0,321 | 0,167 | 0,172 | 0,220 |

**Table S-25.** Structural parameters for the alanine anion conformer **a1l** in water (CPCM-model)

| Conf.                   | Bond lengths [Å] |       |       |       |       |       |       |       | Angle [°] |         | Dihedral angles [°] |         |
|-------------------------|------------------|-------|-------|-------|-------|-------|-------|-------|-----------|---------|---------------------|---------|
|                         | 1,6              | 1,7   | 5,9   | 5,10  | 6,11  | 6,13  | 7,10  | 7,9   | 9,5,10    | 6,1,7   | 10,5,1,7            | 9,5,1,7 |
| <b>a1l<sub>aq</sub></b> | 1.264            | 1.261 | 1.021 | 1.021 | 2.508 | 2.943 | 2.564 | 2.998 | 105.277   | 125.612 | 22.447              | -82.789 |

**Table S-26.** Dipole moments and NBO charges of alanine anion conformer **a1l** in water

| Conf.                   | Dipole [D] | C1    | C2     | C3     | H4    | N5     | O6     | O7     | H9    | H10   | H11   | H12   | H13   |
|-------------------------|------------|-------|--------|--------|-------|--------|--------|--------|-------|-------|-------|-------|-------|
| <b>a1l<sub>aq</sub></b> | 6,861      | 0,759 | -0,121 | -0,575 | 0,194 | -0,885 | -0,852 | -0,846 | 0,367 | 0,365 | 0,192 | 0,199 | 0,203 |

**Table S-27.** Relative energy [kcal/mol], optimized bond lengths, bond angles and dihedral angles for 3-fluoroalanine anion conformers [B3LYP 6-311++G(d,p)] in the gas phase

| Conformer    | Relative energy | Bond lengths [Å] |       |       |       |       |       | Angle [Å] |         |         | Dihedral angles [Å] |          |          |
|--------------|-----------------|------------------|-------|-------|-------|-------|-------|-----------|---------|---------|---------------------|----------|----------|
|              |                 | F,9              | F,10  | 5,9   | 5,10  | 6,13  | 7,9   | 7,10      | 9,5,10  | 5,2,1,7 | 9,5,2,1             | 10,5,2,1 | 10,5,1,7 |
| <b>a1Fa</b>  | 1.96            | -                | 2.361 | 1.022 | 1.018 | 2.468 | 2.182 | 3.090     | 103.708 | 10.599  | -22.921             | 86.487   | 87.019   |
| <b>a1Fbl</b> | 0.15            | -                | 2.514 | 1.021 | 1.015 | 2.647 | 2.085 | 3.488     | 109.909 | -13.756 | 18.412              | 137.828  | 106.395  |
| <b>a1Fcl</b> | 5.58            | -                | -     | 1.021 | 1.018 | -     | 2.154 | -         | 108.655 | -42.899 | 33.353              | 151.423  | 94.935   |
| <b>a1Fbr</b> | 0.00            | 3.047            | -     | 1.013 | 1.021 | 2.460 | 3.469 | 2.065     | 109.347 | 18.228  | -139.487            | -20.961  | -4.749   |
| <b>a1Fcr</b> | 3.84            | -                | -     | 1.016 | 1.022 | -     | -     | 2.282     | 105.072 | -47.951 | -76.078             | 35.342   | -7.542   |

**Table S-28.** Dipole moments and NBO charges of 3-fluoroalanine anion conformers in the gas phase

| Conf.        | Dipole [D] | C1    | C2     | C3    | Fa (H4)* | N5     | O6     | O7     | H9    | H10   | H11   | Fb (H12)* | Fc (H13)* |
|--------------|------------|-------|--------|-------|----------|--------|--------|--------|-------|-------|-------|-----------|-----------|
| <b>a1Fa</b>  | 5,530      | 0,753 | -0,167 | 0,083 | -0,433   | -0,879 | -0,787 | -0,788 | 0,375 | 0,339 | 0,182 | 0,135     | 0,188     |
| <b>a1Fbl</b> | 5,429      | 0,758 | -0,165 | 0,080 | 0,147    | -0,879 | -0,778 | -0,780 | 0,379 | 0,332 | 0,178 | -0,446    | 0,175     |
| <b>a1Fcl</b> | 7,048      | 0,756 | -0,157 | 0,087 | 0,163    | -0,862 | 0,754  | 0,806  | 0,378 | 0,316 | 0,176 | 0,121     | -0,418    |
| <b>a1Fbr</b> | 4,981      | 0,761 | -0,167 | 0,086 | 0,152    | -0,883 | -0,781 | -0,781 | 0,331 | 0,383 | 0,167 | -0,448    | 0,178     |
| <b>a1Fcr</b> | 5,613      | 0,741 | -0,155 | 0,096 | 0,161    | -0,875 | -0,764 | -0,809 | 0,340 | 0,367 | 0,177 | 0,140     | -0,420    |

\* according to Figure 3C

**Table S-29.** Relative energy [kcal/mol], optimized bond lengths, bond angles and dihedral angles for 3-fluoroalanine anion conformers in water [B3LYP 6-311++G(d,p), CPCM model]

| Conformer                 | E <sub>rel</sub><br>[kcal/mol] | Bond lengths [Å] |       |         |       |       |       | Angle [°] |         | Dihedral angles [°] |          |          |
|---------------------------|--------------------------------|------------------|-------|---------|-------|-------|-------|-----------|---------|---------------------|----------|----------|
|                           |                                | 7,9              | 7,10  | F,10(9) | 6,13  | 5,9   | 5,10  | 9,5,10    | 5,2,1,7 | 9,5,2,1             | 10,5,2,1 | 10,5,1,7 |
| <b>a1Fa<sub>aq</sub></b>  | 0.00                           | 2.819            | 2.640 | 2.679   | 2.646 | 1.020 | 1.021 | 105.126   | -6.847  | -61.151             | 53.118   | 43.116   |
| <b>a1Fbl<sub>aq</sub></b> | 0.28                           | 2.380            | -     | 2.524   | 2.792 | 1.020 | 1.020 | 107.992   | -24.462 | 46.800              | 165.605  | 134.916  |
| <b>a1Fcl<sub>aq</sub></b> | 0.79                           | 2.574            | -     | -       | -     | 1.021 | 1.022 | 107.550   | -57.278 | 59.552              | 178.082  | 127.382  |
| <b>a1Fbr<sub>aq</sub></b> | 0.56                           | -                | 2.250 | (2.781) | 2.534 | 1.019 | 1.018 | 107.946   | 16.804  | -152.657            | -34.438  | -18.161  |
| <b>a1Fcr<sub>aq</sub></b> | 0.75                           | 3.346            | 2.549 | -       | -     | 1.020 | 1.021 | 106.466   | -53.653 | -72.290             | 43.829   | -5.229   |

**Table S-30.** Dipole moments and NBO charges of 3-fluoroalanine anion conformers in water

| Conf.                     | Dipole [D] | C1    | C2     | C3    | Fa (H4)* | N5     | O6     | O7     | H9    | H10   | H11   | Fb (H12)* | Fc (H13)* |
|---------------------------|------------|-------|--------|-------|----------|--------|--------|--------|-------|-------|-------|-----------|-----------|
| <b>a1Fal<sub>aq</sub></b> | 7,744      | 0,761 | -0,177 | 0,088 | -0,441   | -0,882 | -0,844 | -0,828 | 0,374 | 0,370 | 0,225 | 0,171     | 0,182     |
| <b>a1Fbl<sub>aq</sub></b> | 8,407      | 0,767 | -0,163 | 0,078 | 0,169    | -0,886 | -0,833 | -0,823 | 0,376 | 0,369 | 0,205 | -0,438    | 0,179     |
| <b>a1Fcl<sub>aq</sub></b> | 10,879     | 0,768 | -0,155 | 0,076 | 0,172    | -0,875 | -0,830 | -0,837 | 0,374 | 0,372 | 0,200 | 0,168     | -0,433    |
| <b>a1Fbr<sub>aq</sub></b> | 7,393      | 0,771 | -0,167 | 0,088 | 0,167    | -0,895 | -0,832 | -0,823 | 0,371 | 0,382 | 0,199 | -0,443    | 0,182     |
| <b>a1Fcr<sub>aq</sub></b> | 8,288      | 0,757 | -0,157 | 0,090 | 0,170    | -0,880 | -0,834 | -0,841 | 0,379 | 0,373 | 0,203 | 0,171     | -0,431    |

\* according to Figure 3C

**Table S-31.** Total energies [au], relative energies [kcal/mol], dipole moments [D] at the B3LYP/6-311++G(d,P)//B3LYP/6-311++G(d,p) MP2/6-311++G(d,P)//B3LYP/6-311++G(d,p) level of theory including zero point energies (ZPE) of alanine and 3-fluoroalanine in the gas phase

| <b>Alanine</b>         |                     |           |               |                           |                 |                       |           |                 |  |
|------------------------|---------------------|-----------|---------------|---------------------------|-----------------|-----------------------|-----------|-----------------|--|
| Compound               | B3LYP/6-311++G(d,p) | $E_{rel}$ | Dipole Moment | B3LYP/6-311++G(d,p) + ZPE | $E_{rel}$ (ZPE) | SCS-MP2/6-311++G(d,p) | $E_{rel}$ | $E_{rel}$ (ZPE) |  |
| <b>Neutrals</b>        |                     |           |               |                           |                 |                       |           |                 |  |
| <b>1</b>               | -323,85608          | 0,00      | 1,3053        | -323,74849                | 0,00            | -322,96501            | 0,00      | 0,00            |  |
| <b>2</b>               | -323,85606          | 0,01      | 5,5837        | -323,74795                | 0,34            | -322,96349            | 0,96      | 1,28            |  |
| <b>3</b>               | -323,85438          | 1,07      | 1,6309        | -323,74669                | 1,13            | -322,96353            | 0,93      | 1,00            |  |
| <b>4</b>               | -323,84696          | 5,72      | 3,3195        | -323,73981                | 5,44            | -322,95585            | 5,75      | 5,47            |  |
| <b>Protonated</b>      |                     |           |               |                           |                 |                       |           |                 |  |
| <b>p1</b>              | -324,21157          | 0,00      | 4,9503        | -324,08962                | 0,00            | -323,32196            | 0,00      | 0,00            |  |
| <b>p3</b>              | -324,20554          | 3,78      | 7,1362        | -324,08364                | 3,75            | -323,31780            | 2,61      | 2,58            |  |
| <b>p4</b>              | -324,19722          | 9,00      | 1,3053        | -324,07588                | 8,62            | -323,30710            | 9,32      | 8,94            |  |
| <b>Anionic</b>         |                     |           |               |                           |                 |                       |           |                 |  |
| <b>Alr</b>             | -323,30308          | 0,00      | 4,5762        | -323,20883                | 0,00            | -322,40548            | 0,00      | 0,00            |  |
| <b>All</b>             | -323,30291          | 0,10      | 4,9439        | -323,20877                | 0,04            | -322,40496            | 0,32      | 0,26            |  |
| <b>3-Fluoroalanine</b> |                     |           |               |                           |                 |                       |           |                 |  |
| Compound               | B3LYP/6-311++G(d,p) | $E_{rel}$ | Dipole Moment | B3LYP/6-311++G(d,p) + ZPE | $E_{rel}$ (ZPE) | SCS-MP2/6-311++G(d,p) | $E_{rel}$ | $E_{rel}$ (ZPE) |  |
| <b>Neutrals</b>        |                     |           |               |                           |                 |                       |           |                 |  |
| <b>1Fa</b>             | -42312022           | 0,34      | 2,4242        | -423,01954                | -0,08           | -422,02942            | 0,00      | 0,00            |  |
| <b>Fb-1</b>            | -423,11832          | 1,53      | 2,0152        | -423,01783                | 1,00            | -422,02695            | 1,55      | 1,43            |  |
| <b>1Fb-2</b>           | -423,11832          | 1,53      | 2,0002        | -423,01771                | 1,07            | -422,02695            | 1,55      | 1,50            |  |
| <b>1Fb-3</b>           | -423,11651          | 2,67      | 2,5371        | -423,01622                | 2,00            | -422,02497            | 2,80      | 2,55            |  |
| <b>1Fc</b>             | -423,11826          | 1,57      | 1,9318        | -423,01753                | 1,19            | -422,02738            | 1,28      | 1,31            |  |
| <b>2Fa-1</b>           | -423,12076          | 0,00      | 5,6016        | -423,01942                | 0,00            | -422,02809            | 0,83      | 1,25            |  |
| <b>2Fa-2</b>           | -423,11244          | 5,22      | 3,2156        | -423,01147                | 4,98            | -422,02041            | 5,65      | 5,83            |  |
| <b>2Fa-3</b>           | -423,11179          | 5,62      | 4,1893        | -423,01181                | 4,77            | -422,01897            | 6,56      | 6,12            |  |
| <b>2Fb</b>             | -423,12065          | 0,07      | 3,7516        | -423,01944                | -0,01           | -422,02808            | 0,84      | 1,18            |  |
| <b>2Fc</b>             | -423,11343          | 4,60      | 6,0474        | -423,01243                | 4,38            | -422,02124            | 5,13      | 5,33            |  |
| <b>3Fa</b>             | -423,11880          | 1,23      | 1,8736        | -423,01800                | 0,89            | -422,02766            | 1,10      | 1,18            |  |
| <b>3Fb-1</b>           | -423,11789          | 1,80      | 2,3546        | -423,01734                | 1,30            | -422,02709            | 1,47      | 1,38            |  |
| <b>3Fb-2</b>           | -423,11663          | 2,59      | 2,2253        | -423,01606                | 2,11            | -422,02564            | 2,37      | 2,30            |  |
| <b>3Fb-3</b>           | -423,11499          | 3,62      | 2,8714        | -423,01454                | 3,06            | -422,02369            | 3,59      | 3,45            |  |
| <b>3Fb-4</b>           | -423,11456          | 3,89      | 2,9621        | -423,01420                | 3,27            | -422,02357            | 3,67      | 3,47            |  |
| <b>3Fb-5</b>           | -423,11445          | 3,96      | 3,2881        | -423,01404                | 3,37            | -422,02272            | 4,21      | 4,04            |  |
| <b>3Fc</b>             | -423,11705          | 2,33      | 2,8819        | -423,01633                | 1,94            | -422,02646            | 1,86      | 1,89            |  |
| <b>4Fa</b>             | -423,10874          | 7,54      | 4,2475        | -423,00854                | 6,83            | -422,01772            | 7,34      | 7,04            |  |
| <b>4Fb</b>             | -423,10703          | 8,61      | 2,0220        | -423,00703                | 7,77            | -422,01548            | 8,75      | 8,32            |  |
| <b>4Fc</b>             | -423,11513          | 3,53      | 3,6414        | -423,01441                | 3,14            | -422,02235            | 4,44      | 4,47            |  |
| <b>Protonated</b>      |                     |           |               |                           |                 |                       |           |                 |  |
| <b>p1Fa</b>            | -423,46903          | 0,00      | 5,1552        | -423,35389                | 0,00            | -422,38023            | 0,00      | 0,00            |  |
| <b>p1Fb</b>            | -423,46816          | 0,55      | 3,0475        | -423,35310                | 0,50            | -422,37956            | 0,42      | 0,37            |  |
| <b>p1Fc</b>            | -423,45758          | 7,19      | 6,8146        | -423,34284                | 6,93            | -422,36863            | 7,28      | 7,02            |  |
| <b>p3Fa</b>            | -423,46349          | 3,48      | 7,0928        | -423,34853                | 3,37            | -422,37592            | 2,71      | 2,59            |  |
| <b>p3Fb</b>            | -423,46267          | 3,99      | 5,8578        | -423,34773                | 3,87            | -422,37534            | 3,07      | 2,94            |  |
| <b>p3Fc</b>            | -423,45024          | 11,80     | 9,4762        | -423,33550                | 11,54           | -422,36393            | 10,23     | 9,97            |  |
| <b>p4Fa</b>            | -423,45212          | 10,62     | 7,2159        | -423,33777                | 10,12           | -422,36237            | 11,21     | 10,71           |  |
| <b>p4Fb</b>            | -423,45273          | 10,23     | 4,5279        | -423,33823                | 9,82            | -422,36351            | 10,49     | 10,09           |  |
| <b>p4Fc</b>            | -423,45082          | 11,43     | 8,0177        | -423,33622                | 11,09           | -422,36025            | 12,54     | 12,20           |  |

| <b>Anionic</b> |            |      |        |            |      |            |      |      |
|----------------|------------|------|--------|------------|------|------------|------|------|
| <b>a1Fa</b>    | -422,57564 | 2,18 | 5,5304 | -422,48814 | 2,40 | -421,47701 | 1,75 | 1,96 |
| <b>a1Fbl</b>   | -422,57872 | 0,25 | 5,4288 | -422,49151 | 0,28 | -421,47960 | 0,12 | 0,15 |
| <b>a1Fbr</b>   | -422,57912 | 0,00 | 4,9813 | -422,49196 | 0,00 | -421,47979 | 0,00 | 0,00 |
| <b>a1Fcr</b>   | -422,57148 | 4,79 | 5,6128 | -422,48404 | 4,97 | -421,47395 | 3,66 | 3,84 |
| <b>a1Fcl</b>   | -422,56905 | 6,32 | 7,0480 | -422,48192 | 6,30 | -421,47086 | 5,60 | 5,58 |

**Table S-32.** Total energies [au], relative energies [kcal/mol], Dipole moments [D] at the B3LYP/6-311++G(d,P)//B3LYP/6-311++G(d,p) MP2/6-311++G(d,P)//B3LYP/6-311++G(d,p) level of theory including zero point energies (ZPE) of alanine and 3-fluoroalanine in water

| <b>Alanine</b>            |                     |                  |               |                   |                            |                  |                      |
|---------------------------|---------------------|------------------|---------------|-------------------|----------------------------|------------------|----------------------|
| Conformer                 | B3LYP/6-311++G(d,p) | E <sub>rel</sub> | Dipole Moment | B3LYP-Solvatation | SCS-MP2/6-311++G(d,p)-CPCM | E <sub>rel</sub> | Solvatation CPCM-MP2 |
| <b>Neutrals</b>           |                     |                  |               |                   |                            |                  |                      |
| <b>1<sub>aq</sub></b>     | -323,87753          | 0,00             | 2,1083        | -15,89            | -322,98559                 | 0,00             | -17,34               |
| <b>2<sub>aq</sub></b>     | -323,87691          | 0,38             | 7,5667        | -16,54            | -322,98289                 | 1,69             | -18,54               |
| <b>3<sub>aq</sub></b>     | -323,87627          | 0,79             | 2,6991        | -16,58            | -322,98443                 | 0,73             | -18,04               |
| <b>4<sub>aq</sub></b>     | -323,87375          | 2,37             | 4,8241        | -21,63            | -322,98152                 | 2,56             | -24,06               |
| <b>Zwitterions</b>        |                     |                  |               |                   |                            |                  |                      |
| <b>zwAr<sub>aq</sub></b>  | -323,87803          | 0,00             | 14,3185       | -51,71            | -322,98339                 | 0,00             | -52,00               |
| <b>zwAl<sub>aq</sub></b>  | -323,87787          | 0,10             | 14,0642       | -45,35            | -322,98249                 | 0,57             | -50,15               |
| <b>Protonated</b>         |                     |                  |               |                   |                            |                  |                      |
| <b>p1<sub>aq</sub></b>    | -324,32911          | 0,00             | 6,5125        | -78,34            | -323,44073                 | 0,00             | -80,35               |
| <b>p3<sub>aq</sub></b>    | -324,32716          | 1,23             | 9,2505        | -82,06            | -323,43839                 | 1,47             | -84,43               |
| <b>p4<sub>aq</sub></b>    | -324,32313          | 3,76             | 10,0172       | -87,34            | -323,43431                 | 4,03             | -90,72               |
| <b>Anionic</b>            |                     |                  |               |                   |                            |                  |                      |
| <b>all<sub>aq</sub></b>   | -323,41060          | 0,00             | 6,8609        | -72,45            | -322,51311                 | 0,00             | -75,96               |
| <b>3-Fluoroalanines</b>   |                     |                  |               |                   |                            |                  |                      |
| Conformer                 | B3LYP/6-311++G(d,p) | E <sub>rel</sub> | Dipole Moment | B3LYP-Solvatation | SCS-MP2/6-311++G(d,p)-CPCM | E <sub>rel</sub> | CPCM-MP2-Solvatation |
| <b>Neutrals</b>           |                     |                  |               |                   |                            |                  |                      |
| <b>1Fa<sub>aq</sub></b>   | -423.14523          | 0,00             | 3.8860        | -18,99            | -422,05312                 | 0,00             | -21,04               |
| <b>1Fb-1<sub>aq</sub></b> | -423.14293          | 1,44             | 3.3023        | -19,11            | -422,05064                 | 1,55             | -21,08               |
| <b>1Fb-2<sub>aq</sub></b> | -423.14313          | 1,32             | 2.9074        | -19,38            | -422,05078                 | 1,46             | -21,40               |
| <b>1Fb-3<sub>aq</sub></b> | -423.14344          | 1,13             | 3.7518        | -20,39            | -422,05095                 | 1,36             | -22,45               |
| <b>1Fc<sub>aq</sub></b>   | -423.14337          | 1,17             | 2.8087        | -18,72            | -422,05140                 | 1,07             | -20,64               |
| <b>2Fa-1<sub>aq</sub></b> | -423.14444          | 0,50             | 7.9027        | -19,18            | -422,05018                 | 1,84             | -21,60               |
| <b>2Fa-2<sub>aq</sub></b> | -423.13891          | 3,97             | 5.5499        | -22,35            | -422,04540                 | 4,84             | -25,24               |
| <b>2Fa-3<sub>aq</sub></b> | -423.13890          | 3,97             | 5.3058        | -22,41            | -422,04536                 | 4,86             | -25,31               |
| <b>2Fb<sub>aq</sub></b>   | -423.14356          | 1,05             | 5.2982        | -17,45            | -422,04937                 | 2,35             | -19,81               |
| <b>2Fc<sub>aq</sub></b>   | -423.14099          | 2,67             | 8.6342        | -22,37            | -422,04709                 | 3,78             | -25,52               |
| <b>3Fa<sub>aq</sub></b>   | -423.14392          | 0,82             | 3.0076        | -19,01            | -422,05150                 | 1,01             | -20,91               |
| <b>3Fb-1<sub>aq</sub></b> | -423.14174          | 2,19             | 3.5673        | -18,14            | -422,04964                 | 2,18             | -19,88               |
| <b>3Fb-2<sub>aq</sub></b> | -423.14169          | 2,23             | 2.9321        | -19,05            | -422,04930                 | 2,40             | -20,96               |
| <b>3Fb-3<sub>aq</sub></b> | -423.14205          | 2,00             | 4.3665        | -20,46            | -422,04984                 | 2,06             | -22,51               |
| <b>3Fb-4<sub>aq</sub></b> | -423.14183          | 2,14             | 4.4683        | -20,89            | -422,04972                 | 2,13             | -22,94               |
| <b>3Fb-5<sub>aq</sub></b> | -423.14201          | 2,02             | 4.8946        | -21,04            | -422,04925                 | 2,43             | -23,11               |
| <b>3Fc<sub>aq</sub></b>   | -423.14289          | 1,47             | 4.1446        | -19,68            | -422,05097                 | 1,34             | -21,61               |
| <b>4Fa<sub>aq</sub></b>   | -423.14034          | 3,07             | 6.8371        | -26,47            | -422,04798                 | 3,22             | -29,85               |
| <b>4Fb<sub>aq</sub></b>   | -423.13911          | 3,84             | 3.4606        | -25,54            | -422,04644                 | 4,19             | -28,52               |
| <b>4Fc<sub>aq</sub></b>   | -423.14013          | 3,21             | 5.1355        | -23,58            | -422,04781                 | 3,33             | -26,47               |



| <b>Zwitterions</b>         |            |      |         |        |            |      |        |
|----------------------------|------------|------|---------|--------|------------|------|--------|
| <b>zwAFa<sub>aq</sub></b>  | -423,14434 | 0,00 | 14,2031 | -46,95 | -422,04876 | 0,08 | -52,50 |
| <b>zwAFbl<sub>aq</sub></b> | -423,14416 | 0,12 | 11,6721 | -43,19 | -422,04860 | 0,18 | -48,09 |
| <b>zwAFcl<sub>aq</sub></b> | -423,13844 | 3,70 | 14,7659 | -51,65 | -422,04296 | 3,72 | -57,70 |
| <b>zwAFcr<sub>aq</sub></b> | -423,13811 | 3,91 | 15,5597 | -54,40 | -422,04366 | 3,28 | -60,68 |
| <b>zwAFbr<sub>aq</sub></b> | -423,14392 | 0,27 | 11,8722 | -43,95 | -422,04889 | 0,00 | -48,77 |
| <b>Protonated</b>          |            |      |         |        |            |      |        |
| <b>p1Fa<sub>aq</sub></b>   | -423,59169 | 0,00 | 7,6919  | -83,63 | -422,50360 | 0,00 | -86,48 |
| <b>p1Fb<sub>aq</sub></b>   | -423,59085 | 0,53 | 4,0745  | -81,99 | -422,50248 | 0,70 | -84,58 |
| <b>p1Fc<sub>aq</sub></b>   | -423,58637 | 3,34 | 8,6202  | -87,56 | -422,49823 | 3,37 | -90,88 |
| <b>p3Fa<sub>aq</sub></b>   | -423,58994 | 1,10 | 9,9214  | -86,76 | -422,50154 | 1,29 | -89,85 |
| <b>p3Fb<sub>aq</sub></b>   | -423,58898 | 1,70 | 8,3484  | -85,37 | -422,50039 | 2,02 | -88,24 |
| <b>p3Fc<sub>aq</sub></b>   | -423,58437 | 4,60 | 12,3062 | -92,52 | -422,49647 | 4,47 | -96,35 |
| <b>p4Fa<sub>aq</sub></b>   | -423,58483 | 4,30 | 11,3776 | -94,49 | -422,49640 | 4,52 | -99,06 |
| <b>p4Fb<sub>aq</sub></b>   | -423,58409 | 4,77 | 6,6589  | -90,76 | -422,49532 | 5,20 | -94,70 |
| <b>p4Fc<sub>aq</sub></b>   | -423,58161 | 6,33 | 11,4618 | -94,27 | -422,49319 | 6,53 | -98,72 |
| <b>Anionic</b>             |            |      |         |        |            |      |        |
| <b>a1Fa<sub>aq</sub></b>   | -422,68163 | 0,00 | 7,7444  | -72,72 | -421,58356 | 0,00 | -76,63 |
| <b>a1Fbl<sub>aq</sub></b>  | -422,68143 | 0,12 | 8,4074  | -70,38 | -421,58311 | 0,28 | -73,97 |
| <b>a1Fbr<sub>aq</sub></b>  | -422,68145 | 0,11 | 7,3933  | -69,06 | -421,58267 | 0,56 | -72,51 |
| <b>a1Fcr<sub>aq</sub></b>  | -422,68005 | 0,99 | 8,2887  | -74,15 | -421,58236 | 0,75 | -78,17 |
| <b>a1Fcl<sub>aq</sub></b>  | -422,67994 | 1,06 | 10,8685 | -78,55 | -421,58230 | 0,79 | -83,05 |

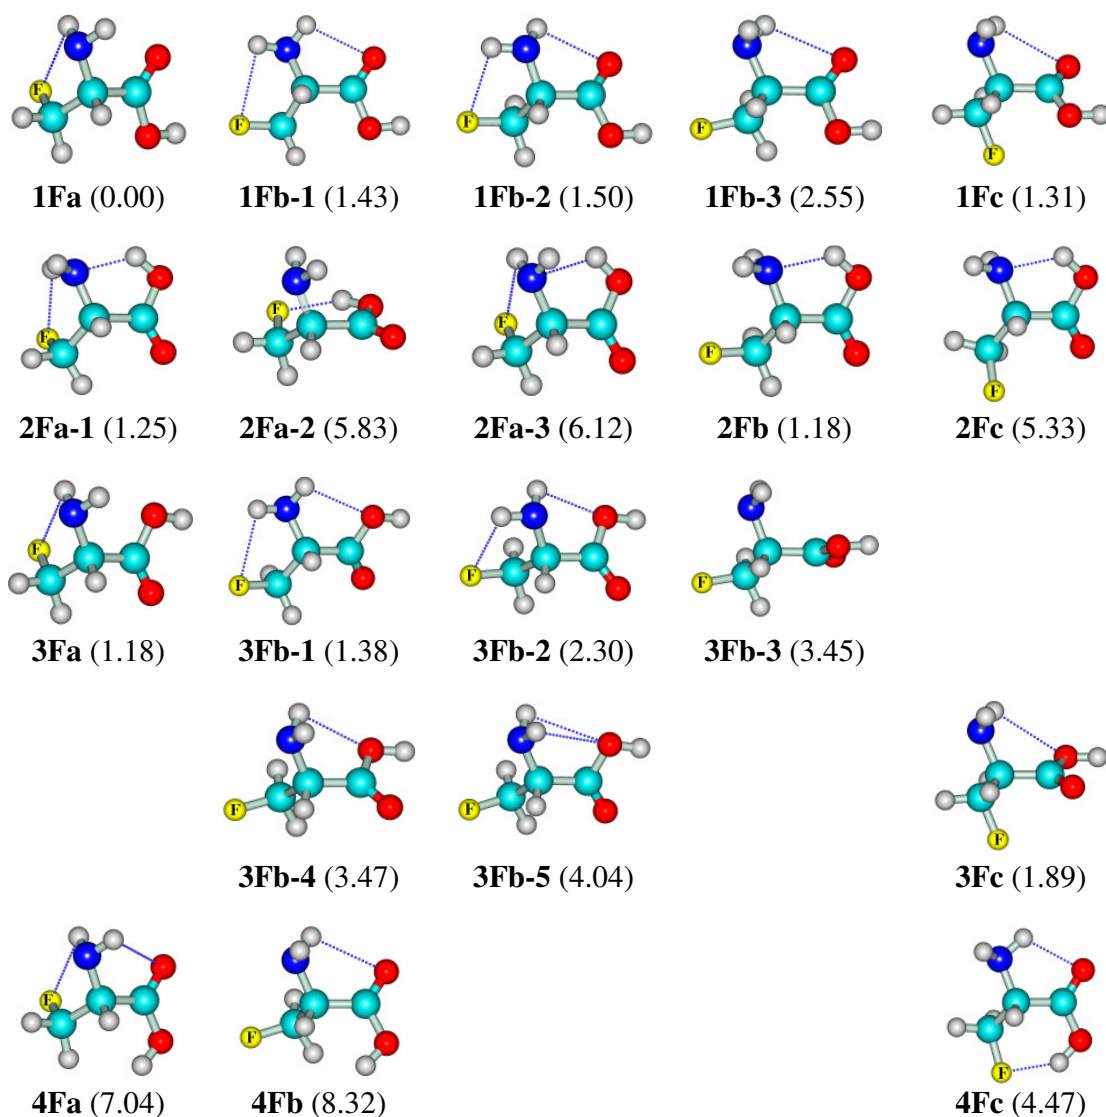

**Figure S-1.** Twenty 3-fluoroalanine conformers **1Fa-4Fc** (basic types **1-4** of alanine) and relative energies [kcal/mol] of (SCS-MP2/B3LYP 6-311++G(d,p)). The (*S*)-enantiomer is drawn.

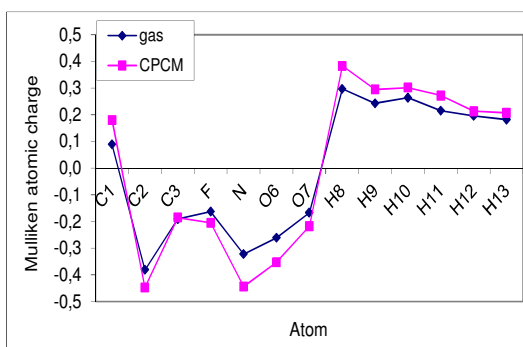

1Fa

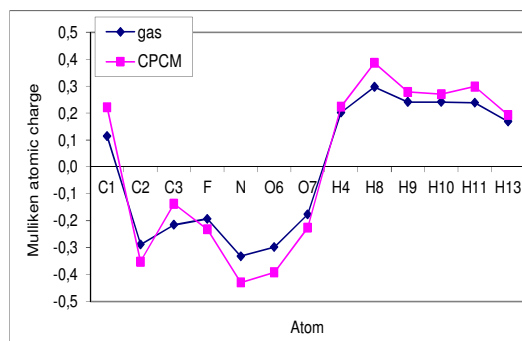

1Fb-1

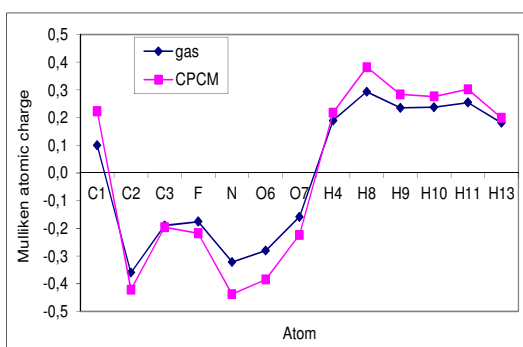

1Fb-2

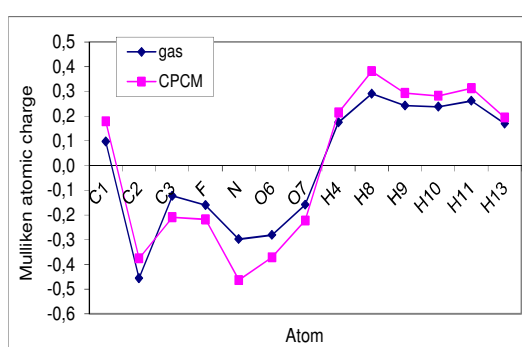

1Fb-3

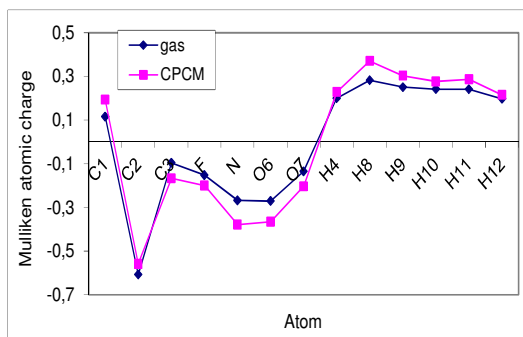

1Fc

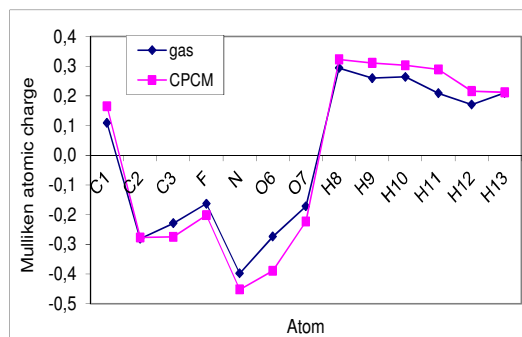

2Fa-1

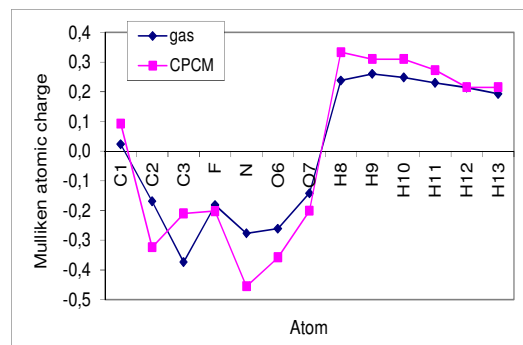

2Fa-2

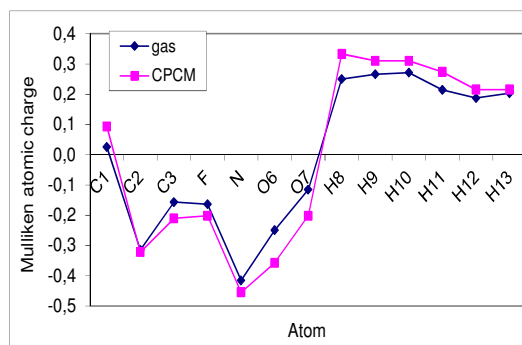

2Fa-3

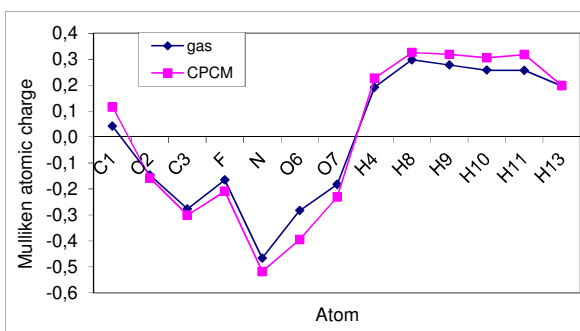

2Fb

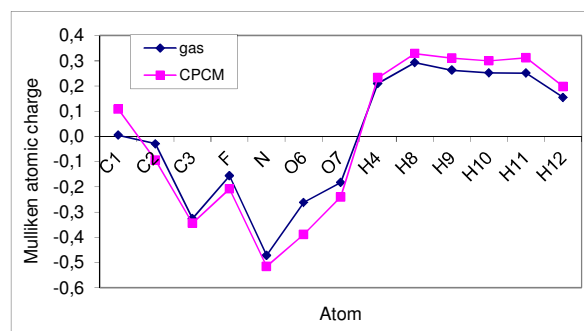

2Fbc

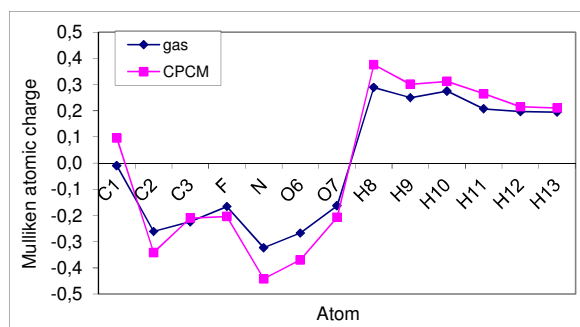

3Fa

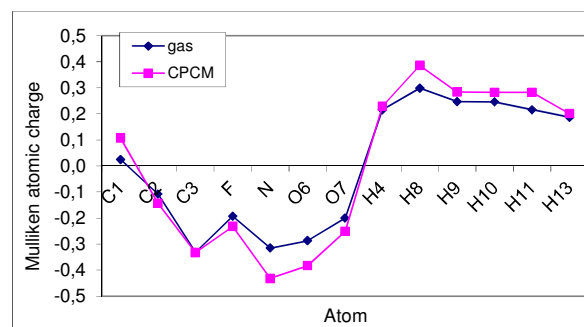

3Fb-1

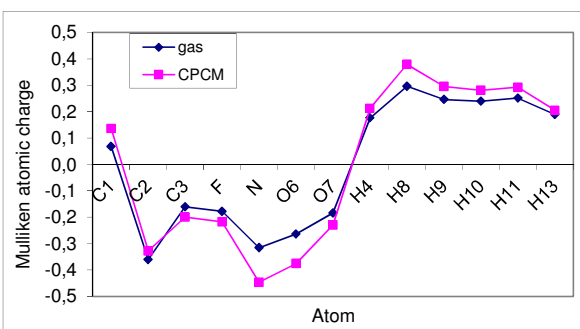

3Fb-2

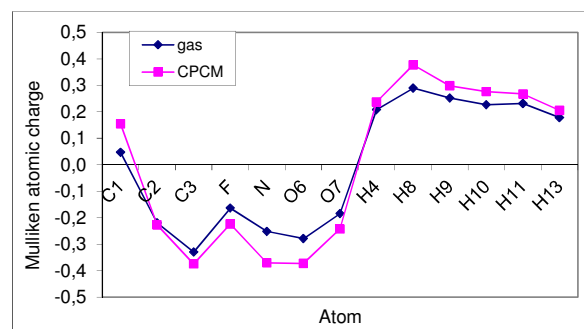

3Fb-3

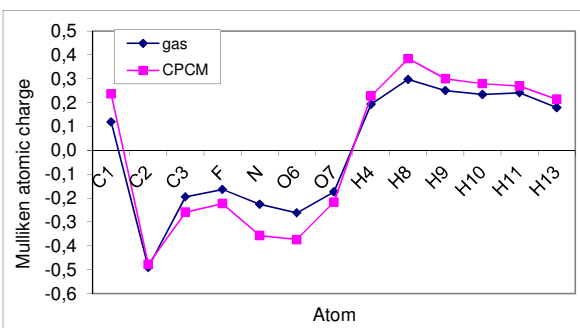

3Fb-4

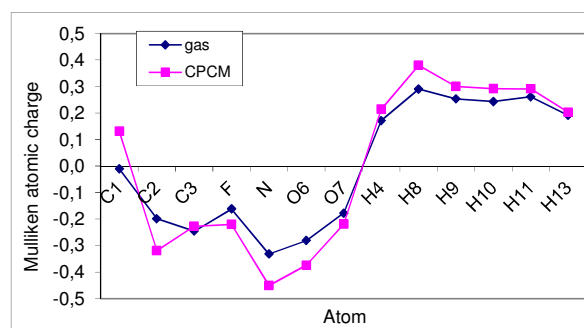

3Fb-5

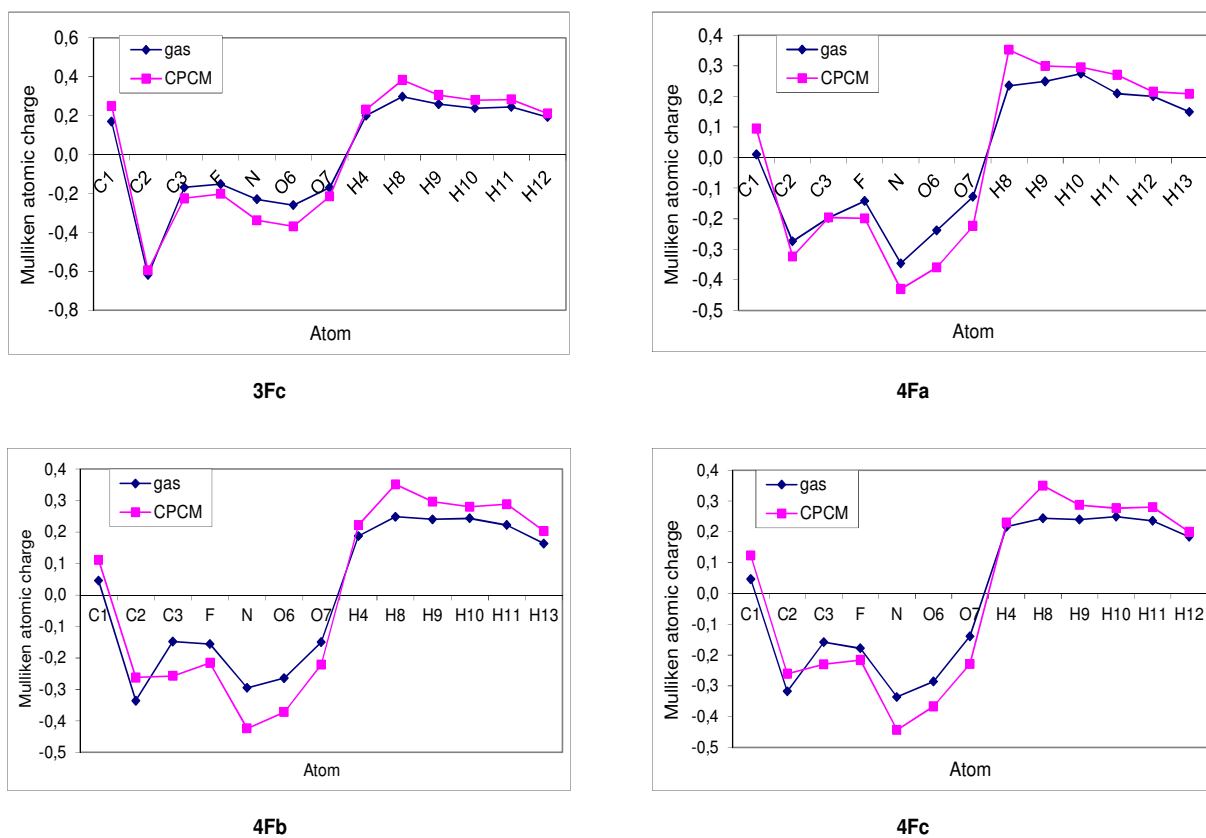

**Figure S-2.** Variation of Mulliken atomic charges for 3-fluoroalanine conformers **1Fa-4Fc** in the gas phase and in aqueous solution.

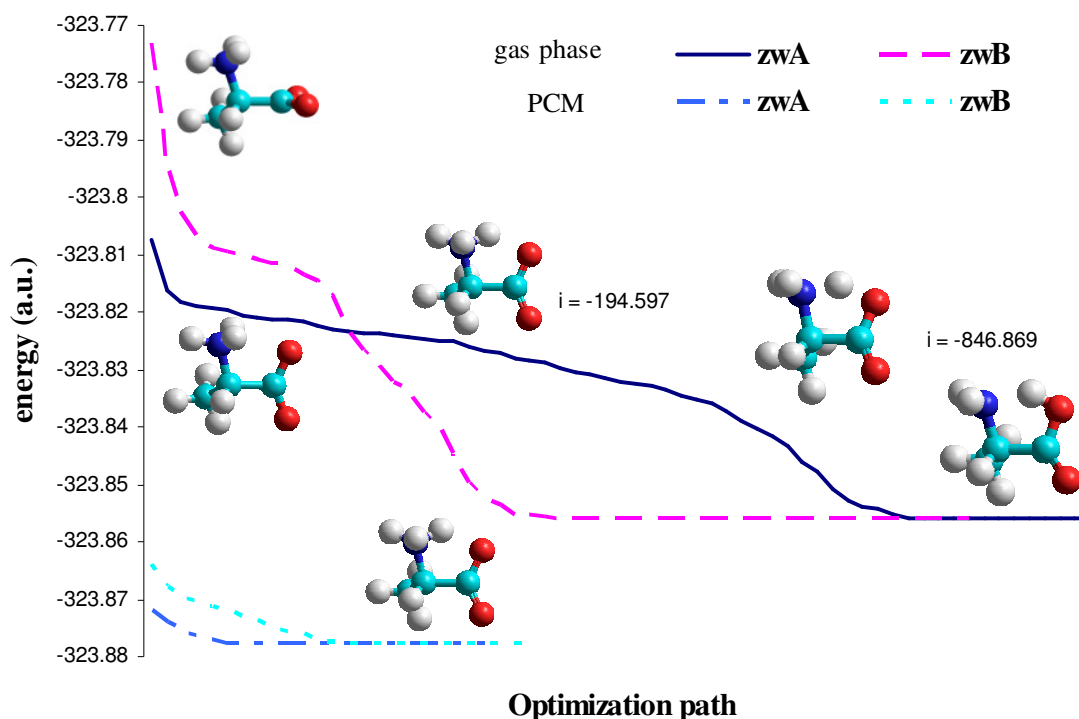

**Figure S-3.** B3LYP 6-311++G(d,p) optimized of two forms of alanine zwitterions in gas phase (upper part) and aqueous solution (CPCM) (lower part). Intramolecular proton transfer from  $\text{NH}_3^+$  to  $\text{COO}^-$  group in the gas phase and imaginary frequencies for this.

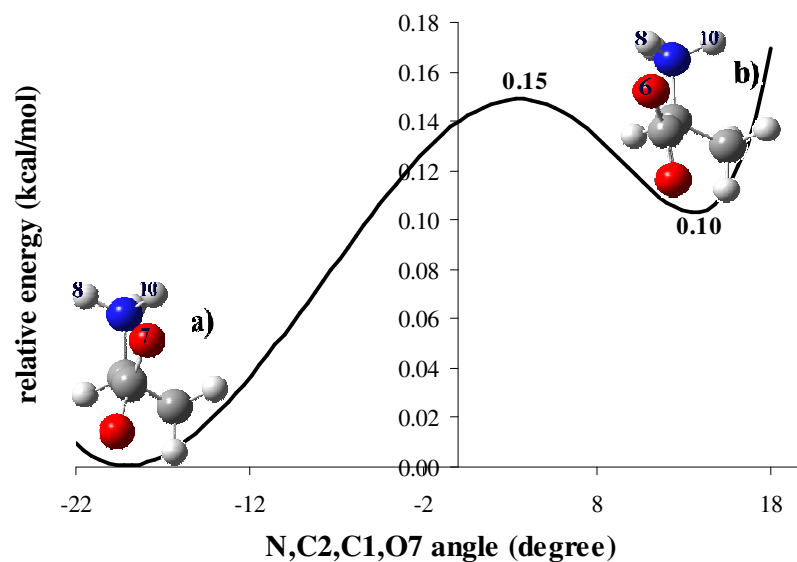

**Figure S-4.** Stable structures for the alanine zwitterion in aqueous solution, relative energy and rotation barrier (kcal/mol): a)  $\text{zwAr}_{\text{aq}}$ ; b)  $\text{zwAl}_{\text{aq}}$ .

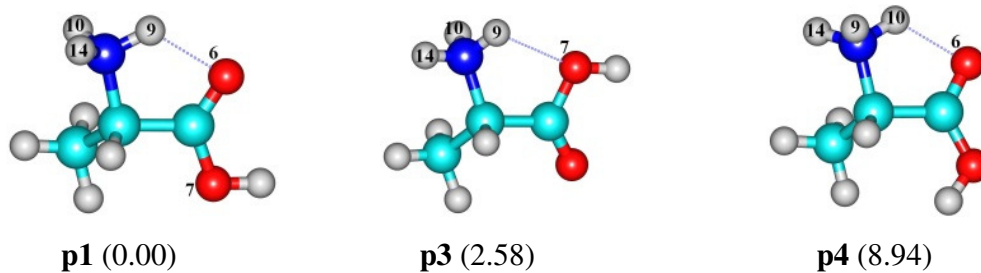

**Figure S-5.** Conformers of protonated alanine with relative energies [kcal/mol].

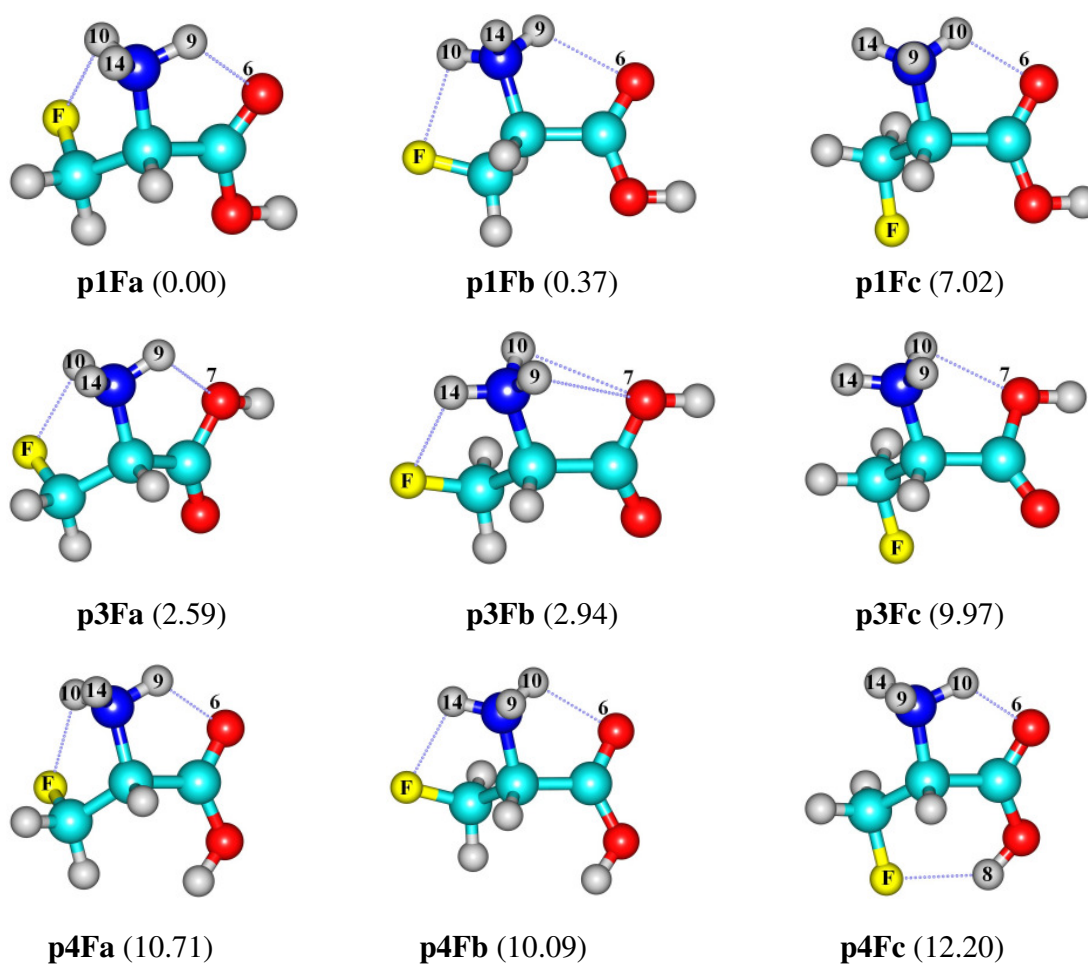

**Figure S-6.** Nine conformers of protonated 3-fluoroalanine with relative energies [kcal/mol].

24

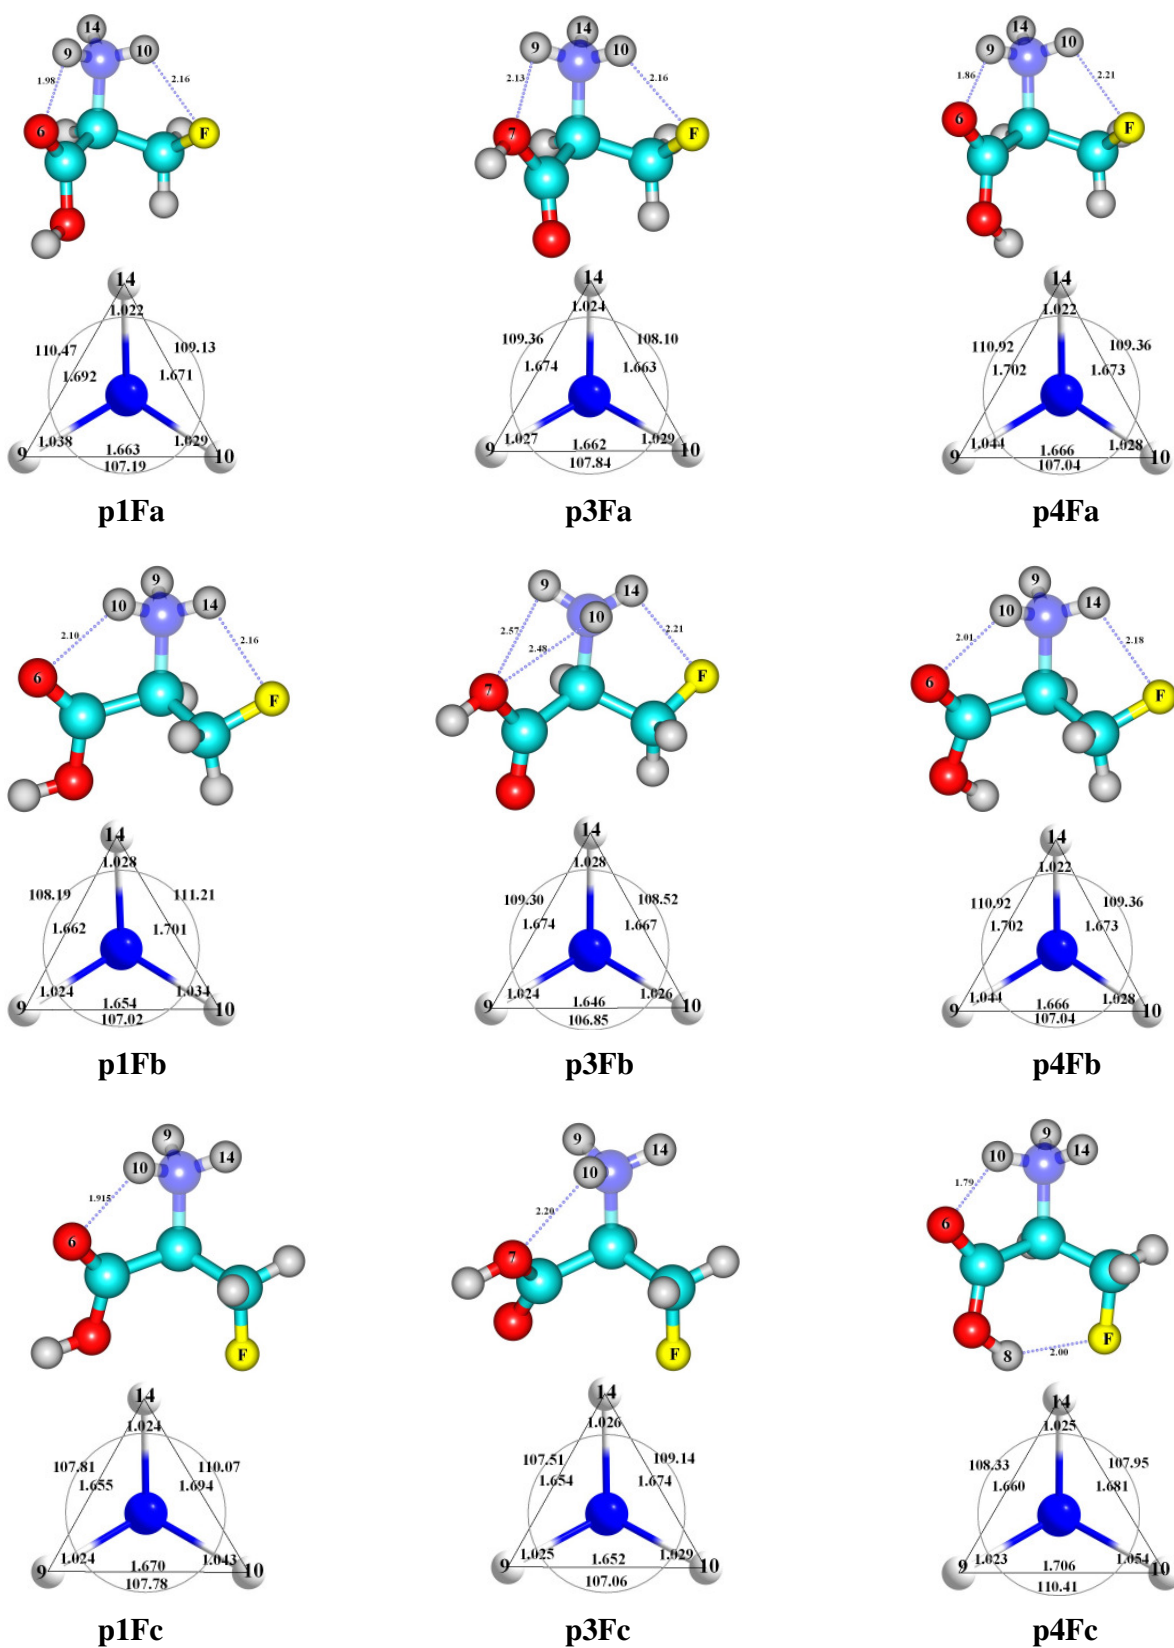

**Figure S-7.** Hydrogen bridges and structural parameters of  $\text{NH}_3^+$  group for optimized protonate alanine conformers in gaseous phase [B3LYP/6-311++G(d,p) levels].



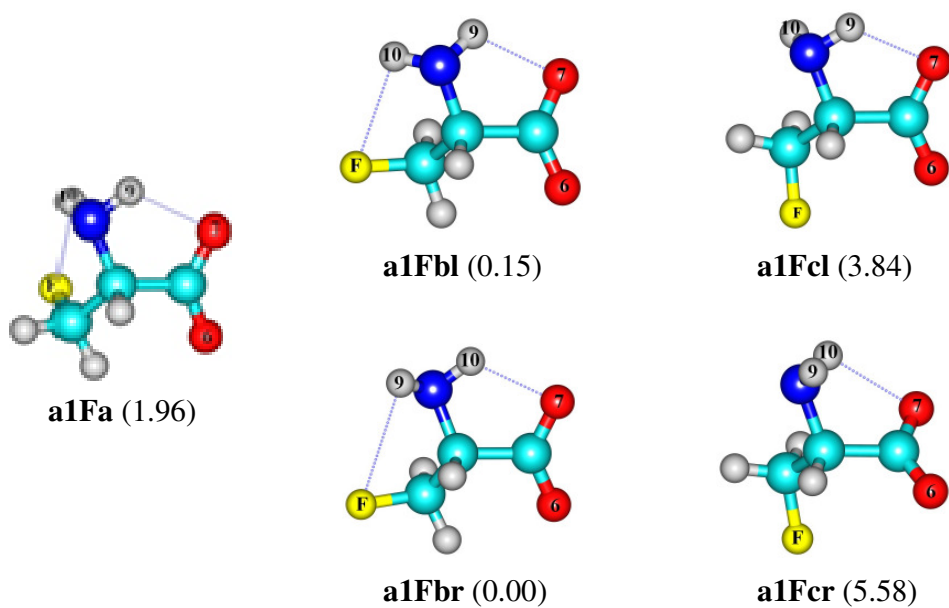

**Figure S-8** 3-Fluoroalanine anion conformers and relative energies [kcal/mol] in the gas phase.

## Calculated Structures (energy [a.u.], xyz coordinates and NBO charges)

### Alanines, Gas Phase

| <b>1</b> -323.8560796 |         |         |         |         |
|-----------------------|---------|---------|---------|---------|
|                       | x       | y       | z       | NBO     |
| 1                     | -1.5255 | 1.4205  | 0.6032  | 0.3577  |
| 7                     | -1.5479 | 1.0175  | -0.3294 | -0.8305 |
| 6                     | -0.6655 | 0.1370  | 0.3984  | -0.1195 |
| 6                     | 0.7812  | -0.1725 | -0.0020 | 0.7932  |
| 8                     | 1.1453  | -1.1317 | 0.6311  | -0.6068 |
| 6                     | -1.2032 | 1.2703  | 0.4906  | -0.5725 |
| 1                     | -1.2407 | -1.7471 | -0.9646 | 0.3567  |
| 8                     | 1.6392  | 0.7837  | -0.4369 | -0.6932 |
| 1                     | 2.5254  | 0.5407  | -0.1281 | 0.4779  |
| 1                     | -0.6427 | 0.4922  | -1.4331 | 0.2100  |
| 1                     | -0.5773 | 2.1612  | 0.4196  | 0.2117  |
| 1                     | -1.2366 | 0.9526  | 1.5372  | 0.1989  |
| 1                     | -2.2180 | 1.5179  | 0.1765  | 0.2164  |

| <b>2</b> -323.856035 |         |         |         |         |
|----------------------|---------|---------|---------|---------|
|                      | X       | y       | z       | NBO     |
| 8                    | 1.4613  | -1.1887 | 0.0847  | -0.5913 |
| 6                    | 0.8645  | -0.1446 | 0.0572  | 0.7894  |
| 6                    | -0.6447 | -0.0285 | 0.3771  | -0.1306 |
| 7                    | -1.1220 | 1.3201  | 0.0139  | -0.8796 |
| 6                    | -1.4328 | -1.1812 | -0.2481 | -0.5862 |
| 8                    | 1.4557  | 1.0265  | -0.2175 | -0.6853 |
| 1                    | -1.5717 | 1.3220  | -0.8966 | 0.3650  |
| 1                    | -1.7870 | 1.6842  | 0.6856  | 0.3734  |
| 1                    | -0.6988 | -0.1110 | 1.4681  | 0.2139  |
| 1                    | -1.4256 | -1.1054 | -1.3402 | 0.1988  |
| 1                    | -2.4706 | -1.1643 | 0.0935  | 0.1996  |
| 1                    | -0.9851 | -2.1378 | 0.0220  | 0.2334  |
| 1                    | 0.7353  | 1.6947  | -0.1848 | 0.4996  |

| <b>3</b> -323.8543779 |         |         |         |         |
|-----------------------|---------|---------|---------|---------|
|                       | x       | y       | z       | NBO     |
| 8                     | -1.7002 | -0.6606 | -0.7015 | -0.6015 |
| 6                     | -0.8260 | -0.0667 | -0.1210 | 0.7911  |
| 6                     | 0.6693  | -0.1656 | -0.4306 | -0.1160 |
| 7                     | 1.3822  | 1.1092  | -0.4654 | -0.8311 |
| 6                     | 1.3353  | -1.1125 | 0.5771  | -0.5742 |
| 8                     | -1.0828 | 0.7695  | 0.9191  | -0.7039 |
| 1                     | 1.3089  | 1.5895  | 0.4260  | 0.3577  |
| 1                     | 1.0057  | 1.7262  | -1.1775 | 0.3560  |
| 1                     | 0.7244  | -0.6125 | -1.4257 | 0.2104  |
| 1                     | 0.8379  | -2.0850 | 0.5928  | 0.2095  |

|   |           |          |          |         |
|---|-----------|----------|----------|---------|
| 1 | 1.3004    | -0.6908  | 1.5853   | 0.2016  |
| 1 | 2.3805    | -1.2528  | 0.2968   | 0.2163  |
| 1 | -2.040438 | 0.758792 | 1.066532 | 0.48427 |

|                       |         |         |         |         |
|-----------------------|---------|---------|---------|---------|
| <b>4</b> -323.8469574 |         |         |         |         |
|                       | x       | y       | z       | NBO     |
| 1                     | -1.5316 | -1.4203 | 0.5451  | 0.3611  |
| 7                     | -1.5413 | -0.9918 | -0.3766 | -0.8297 |
| 6                     | -0.6434 | 0.1510  | -0.3963 | -0.1279 |
| 6                     | 0.8029  | -0.1944 | 0.0137  | 0.7819  |
| 8                     | 1.1088  | -1.1695 | 0.6406  | -0.5739 |
| 6                     | -1.1851 | 1.2557  | 0.5273  | -0.5759 |
| 1                     | -1.2273 | -1.7073 | -1.0247 | 0.3585  |
| 8                     | 1.7579  | 0.7033  | -0.3574 | -0.6791 |
| 1                     | 1.3706  | 1.4187  | -0.8769 | 0.4688  |
| 1                     | -0.6195 | 0.5348  | -1.4245 | 0.1913  |
| 1                     | -0.5630 | 2.1541  | 0.5085  | 0.1979  |
| 1                     | -1.2248 | 0.8977  | 1.5598  | 0.2076  |
| 1                     | -2.1959 | 1.5211  | 0.2154  | 0.2194  |

#### Alanines, CPCM

|                                    |         |         |         |         |
|------------------------------------|---------|---------|---------|---------|
| <b>1<sub>aq</sub></b> -323.8775264 |         |         |         |         |
|                                    | x       | y       | z       | NBO     |
| 1                                  | -1.5573 | -1.4115 | 0.6049  | 0.3727  |
| 7                                  | -1.5466 | -1.0207 | -0.3388 | -0.8705 |
| 6                                  | -0.6643 | 0.1376  | -0.3980 | -0.1251 |
| 6                                  | 0.7849  | -0.1653 | -0.0030 | 0.8138  |
| 8                                  | 1.1445  | -1.1297 | 0.6412  | -0.6698 |
| 6                                  | -1.2035 | 1.2685  | 0.4937  | -0.5753 |
| 1                                  | -1.2063 | -1.7597 | -0.9555 | 0.3788  |
| 8                                  | 1.6314  | 0.7779  | -0.4419 | -0.7107 |
| 1                                  | 2.5512  | 0.5582  | -0.1376 | 0.5349  |
| 1                                  | -0.6349 | 0.4951  | -1.4346 | 0.2244  |
| 1                                  | -0.5704 | 2.1557  | 0.4372  | 0.2126  |
| 1                                  | -1.2539 | 0.9438  | 1.5377  | 0.2013  |
| 1                                  | -2.2114 | 1.5328  | 0.1684  | 0.2130  |

|                                    |         |         |         |         |
|------------------------------------|---------|---------|---------|---------|
| <b>2<sub>aq</sub></b> -323.8769267 |         |         |         |         |
|                                    | x       | y       | z       | NBO     |
| 8                                  | 1.4995  | -1.1664 | 0.1023  | -0.6706 |
| 6                                  | 0.8570  | -0.1368 | 0.0590  | 0.8117  |
| 6                                  | -0.6453 | -0.0424 | 0.3783  | -0.1374 |
| 7                                  | -1.1147 | 1.3076  | 0.0321  | -0.8982 |
| 6                                  | -1.4321 | -1.1882 | -0.2647 | -0.5852 |

|   |         |         |         |         |
|---|---------|---------|---------|---------|
| 8 | 1.4243  | 1.0311  | -0.2415 | -0.7088 |
| 1 | -1.6029 | 1.3240  | -0.8650 | 0.3901  |
| 1 | -1.7506 | 1.6770  | 0.7380  | 0.4029  |
| 1 | -0.6963 | -0.1441 | 1.4717  | 0.2422  |
| 1 | -1.4225 | -1.0995 | -1.3556 | 0.2035  |
| 1 | -2.4696 | -1.1608 | 0.0749  | 0.2103  |
| 1 | -1.0015 | -2.1539 | 0.0044  | 0.2198  |
| 1 | 0.6781  | 1.6913  | -0.2154 | 0.5198  |

| <b>3<sub>aq</sub></b> -323.8762695 |         |         |         |         |
|------------------------------------|---------|---------|---------|---------|
|                                    | x       | y       | z       | NBO     |
| 8                                  | -1.6760 | -0.7517 | -0.6352 | -0.6738 |
| 6                                  | -0.8241 | -0.0585 | -0.1122 | 0.8136  |
| 6                                  | 0.6720  | -0.1667 | -0.4221 | -0.1207 |
| 7                                  | 1.3994  | 1.1000  | -0.4645 | -0.8695 |
| 6                                  | 1.3199  | -1.1181 | 0.5954  | -0.5763 |
| 8                                  | -1.1053 | 0.8606  | 0.8196  | -0.7105 |
| 1                                  | 1.3644  | 1.5686  | 0.4417  | 0.3735  |
| 1                                  | 0.9792  | 1.7351  | -1.1447 | 0.3796  |
| 1                                  | 0.7253  | -0.6240 | -1.4161 | 0.2194  |
| 1                                  | 0.8056  | -2.0817 | 0.6207  | 0.2109  |
| 1                                  | 1.2949  | -0.6855 | 1.5999  | 0.2031  |
| 1                                  | 2.3624  | -1.2850 | 0.3172  | 0.2136  |
| 1                                  | -2.0838 | 0.8611  | 0.9904  | 0.5371  |

| <b>4<sub>aq</sub></b> -323.8737476 |         |         |         |         |
|------------------------------------|---------|---------|---------|---------|
|                                    | x       | y       | z       | NBO     |
| 1                                  | -1.5497 | -1.4675 | 0.4067  | 0.3747  |
| 7                                  | -1.5061 | -0.9890 | -0.4948 | -0.8673 |
| 6                                  | -0.6362 | 0.1773  | -0.4057 | -0.1303 |
| 6                                  | 0.7958  | -0.1577 | 0.0403  | 0.8087  |
| 8                                  | 1.0624  | -1.0298 | 0.8391  | -0.6621 |
| 6                                  | -1.2216 | 1.2009  | 0.5816  | -0.5767 |
| 1                                  | -1.1351 | -1.6619 | -1.1676 | 0.3800  |
| 8                                  | 1.7906  | 0.5949  | -0.4623 | -0.7114 |
| 1                                  | 1.4782  | 1.2222  | -1.1610 | 0.5367  |
| 1                                  | -0.5803 | 0.6354  | -1.4021 | 0.2172  |
| 1                                  | -0.6007 | 2.0979  | 0.6479  | 0.2100  |
| 1                                  | -1.3025 | 0.7620  | 1.5802  | 0.2050  |
| 1                                  | -2.2195 | 1.4910  | 0.2478  | 0.2155  |

### 3-Fluoroalanines Gasphase

| <b>1Fa</b> -423.1202222 |         |         |         |         |
|-------------------------|---------|---------|---------|---------|
|                         | x       | y       | z       | NBO     |
| 1                       | 1.0605  | 1.6583  | 0.7257  | 0.3660  |
| 7                       | 0.8165  | 1.6731  | -0.2601 | -0.8327 |
| 6                       | 0.2836  | 0.3842  | -0.6561 | -0.1592 |
| 6                       | -1.0585 | 0.0267  | 0.0035  | 0.7949  |
| 8                       | -1.6634 | 0.7290  | 0.7695  | -0.5931 |
| 6                       | 1.3213  | -0.7085 | -0.4285 | 0.0912  |
| 1                       | 0.1192  | 2.4007  | -0.3750 | 0.3645  |
| 8                       | -1.5160 | -1.1783 | -0.4146 | -0.6966 |
| 1                       | -2.3642 | -1.3387 | 0.0265  | 0.4862  |
| 1                       | 0.0914  | 0.3938  | -1.7372 | 0.2241  |
| 1                       | 0.9657  | -1.6805 | -0.7696 | 0.1791  |
| 9                       | 1.5906  | -0.8143 | 0.9468  | -0.4008 |
| 1                       | 2.2550  | -0.4366 | -0.9225 | 0.1765  |

| <b>1Fb-1</b> -423.1183171 |         |         |         |         |
|---------------------------|---------|---------|---------|---------|
|                           | x       | y       | z       | NBO     |
| 9                         | -2.4962 | -0.3884 | 0.0951  | -0.4022 |
| 8                         | 2.0914  | 0.7475  | -0.1435 | -0.5907 |
| 6                         | -0.2319 | 0.2694  | 0.3242  | -0.1539 |
| 7                         | -0.5085 | 1.6183  | -0.1408 | -0.8466 |
| 6                         | 1.2268  | -0.0668 | 0.0462  | 0.8066  |
| 6                         | -1.1968 | -0.7182 | -0.3259 | 0.0927  |
| 8                         | 1.4651  | -1.3981 | 0.0904  | -0.6904 |
| 1                         | -0.3401 | 0.1432  | 1.4172  | 0.2031  |
| 1                         | -1.3694 | 1.9696  | 0.2600  | 0.3667  |
| 1                         | 0.2547  | 2.2460  | 0.0855  | 0.3759  |
| 1                         | -1.1736 | -0.6242 | -1.4132 | 0.1731  |
| 1                         | -1.0018 | -1.7445 | -0.0167 | 0.1779  |
| 1                         | 2.4164  | -1.5267 | -0.0454 | 0.4878  |

| <b>1Fb-2</b> -423.1183178 |         |         |         |         |
|---------------------------|---------|---------|---------|---------|
|                           | x       | y       | z       | NBO     |
| 7                         | 0.5614  | 1.5933  | -0.4256 | -0.8372 |
| 6                         | 0.2373  | 0.1786  | -0.4348 | -0.1538 |
| 6                         | -1.2099 | -0.0128 | -0.0083 | 0.8029  |
| 8                         | -1.7090 | -1.1905 | -0.4473 | -0.6850 |
| 8                         | -1.8356 | 0.7568  | 0.6734  | -0.5911 |
| 6                         | 1.1220  | -0.6925 | 0.4748  | 0.0861  |
| 1                         | 0.1991  | 2.0450  | 0.4081  | 0.3691  |

|   |         |         |         |         |
|---|---------|---------|---------|---------|
| 1 | 1.5644  | 1.7306  | -0.4758 | 0.3660  |
| 1 | 0.3418  | -0.2097 | -1.4530 | 0.2184  |
| 1 | 0.8836  | -1.7538 | 0.3791  | 0.1738  |
| 9 | 2.4563  | -0.5213 | 0.0792  | -0.3995 |
| 1 | 1.0503  | -0.3753 | 1.5188  | 0.1641  |
| 1 | -2.6148 | -1.2680 | -0.1100 | 0.4860  |

| <b>1Fb-3</b> -423.1165083 |         |         |         |         |
|---------------------------|---------|---------|---------|---------|
|                           | x       | y       | z       | NBO     |
| 8                         | -1.5495 | -1.3189 | -0.4268 | -0.6887 |
| 6                         | -1.2007 | -0.0788 | -0.0116 | 0.7894  |
| 6                         | 0.2523  | 0.2605  | -0.3714 | -0.1581 |
| 7                         | 0.5601  | 1.6742  | -0.2752 | -0.8277 |
| 6                         | 1.1879  | -0.5680 | 0.5202  | 0.1002  |
| 1                         | 0.1149  | 2.0818  | 0.5418  | 0.3648  |
| 1                         | 0.2228  | 2.1808  | -1.0853 | 0.3599  |
| 1                         | 0.4217  | -0.0781 | -1.3976 | 0.2272  |
| 8                         | -1.9531 | 0.6511  | 0.5816  | -0.5960 |
| 1                         | 0.8628  | -1.6089 | 0.5744  | 0.1708  |
| 1                         | 1.2427  | -0.1368 | 1.5237  | 0.1646  |
| 9                         | 2.4737  | -0.5581 | -0.0156 | -0.3879 |
| 1                         | -2.4663 | -1.4756 | -0.1519 | 0.4816  |

| <b>1Fc</b> -423.1182566 |         |         |         |         |
|-------------------------|---------|---------|---------|---------|
|                         | x       | y       | z       | NBO     |
| 1                       | 0.0000  | 2.2066  | 0.6554  | 0.3673  |
| 7                       | 0.3408  | 1.9736  | -0.2731 | -0.8332 |
| 6                       | 0.3129  | 0.5276  | -0.4735 | -0.1516 |
| 6                       | -0.9608 | -0.1227 | 0.0730  | 0.7943  |
| 8                       | -1.4346 | 0.1329  | 1.1530  | -0.6084 |
| 6                       | 1.5344  | -0.0551 | 0.2427  | 0.0991  |
| 1                       | -0.2488 | 2.4492  | -0.9465 | 0.3624  |
| 8                       | -1.5072 | -1.0051 | -0.7863 | -0.6733 |
| 1                       | -2.2846 | -1.3940 | -0.3551 | 0.4797  |
| 1                       | 0.3929  | 0.3082  | -1.5394 | 0.2158  |
| 9                       | 1.5582  | -1.4481 | 0.1114  | -0.3945 |
| 1                       | 1.5017  | 0.1777  | 1.3101  | 0.1675  |
| 1                       | 2.4442  | 0.3492  | -0.2019 | 0.1749  |

| <b>2Fa-1</b> -423.120757 |         |         |         |         |
|--------------------------|---------|---------|---------|---------|
|                          | x       | y       | z       | NBO     |
| 6                        | -1.3993 | -0.6142 | 0.4364  | 0.0811  |
| 6                        | -0.2056 | 0.3061  | 0.6582  | -0.1714 |
| 6                        | 1.0859  | -0.3088 | 0.0605  | 0.7929  |
| 8                        | 1.8646  | 0.5733  | -0.5714 | -0.6759 |

|   |         |         |         |         |
|---|---------|---------|---------|---------|
| 7 | -0.3962 | 1.6728  | 0.1581  | -0.8796 |
| 1 | -1.0342 | 1.6842  | -0.6325 | 0.3805  |
| 1 | -0.7497 | 2.3031  | 0.8673  | 0.3745  |
| 1 | -0.0201 | 0.3451  | 1.7372  | 0.2278  |
| 8 | 1.3702  | -1.4685 | 0.1992  | -0.5876 |
| 1 | -1.1335 | -1.6524 | 0.6343  | 0.1973  |
| 9 | -1.7979 | -0.5163 | -0.9085 | -0.4012 |
| 1 | -2.2537 | -0.3081 | 1.0445  | 0.1612  |
| 1 | 1.3808  | 1.4278  | -0.5332 | 0.5006  |

| <b>2Fa-2</b> -423.1124388 |         |         |         |         |
|---------------------------|---------|---------|---------|---------|
|                           | x       | y       | z       | NBO     |
| 1                         | -0.0547 | -1.4415 | -0.7711 | 0.4875  |
| 6                         | -1.3534 | -0.0129 | 0.8306  | 0.0782  |
| 6                         | -0.1079 | 0.7267  | 0.3760  | -0.1685 |
| 6                         | 1.1111  | -0.1857 | 0.1065  | 0.7768  |
| 8                         | 0.8935  | -1.3094 | -0.6161 | -0.6856 |
| 8                         | 2.2203  | 0.1113  | 0.4588  | -0.5699 |
| 7                         | -0.4350 | 1.5919  | -0.7587 | -0.8299 |
| 9                         | -1.7994 | -0.8787 | -0.2077 | -0.4141 |
| 1                         | -1.1686 | -0.6411 | 1.7036  | 0.1777  |
| 1                         | 0.1960  | 1.3665  | 1.2090  | 0.2305  |
| 1                         | 0.3662  | 2.1490  | -1.0353 | 0.3690  |
| 1                         | -0.7434 | 1.0586  | -1.5651 | 0.3596  |
| 1                         | -2.1647 | 0.6897  | 1.0189  | 0.1887  |

| <b>2Fa-3</b> -423.1117944 |         |         |         |         |
|---------------------------|---------|---------|---------|---------|
|                           | x       | y       | z       | NBO     |
| 1                         | -1.0481 | 1.3928  | 0.9397  | 0.4745  |
| 6                         | 1.3267  | -0.7535 | -0.3705 | 0.0926  |
| 6                         | 0.2398  | 0.2571  | -0.7153 | -0.1727 |
| 6                         | -1.0995 | -0.1988 | -0.0762 | 0.7855  |
| 8                         | -1.6432 | 0.6351  | 0.8296  | -0.6677 |
| 8                         | -1.6271 | -1.2323 | -0.3833 | -0.5790 |
| 7                         | 0.7067  | 1.5937  | -0.4189 | -0.8789 |
| 9                         | 1.6543  | -0.6169 | 0.9919  | -0.4039 |
| 1                         | 0.9795  | -1.7736 | -0.5309 | 0.1891  |
| 1                         | 0.0720  | 0.1696  | -1.7943 | 0.2319  |
| 1                         | 0.1561  | 2.3698  | -0.7512 | 0.3759  |
| 1                         | 1.1332  | 1.7346  | 0.4851  | 0.3799  |
| 1                         | 2.2332  | -0.5481 | -0.9412 | 0.1728  |

| <b>2Fb</b> -423.1206509 |         |         |         |         |
|-------------------------|---------|---------|---------|---------|
|                         | x       | y       | z       | NBO     |
| 8                       | -1.4704 | -1.5113 | -0.0433 | -0.5845 |
| 6                       | -1.2130 | -0.3366 | -0.0640 | 0.7883  |
| 6                       | 0.2063  | 0.2074  | -0.3400 | -0.1686 |
| 7                       | 0.2883  | 1.6208  | 0.0481  | -0.8723 |
| 6                       | 1.2512  | -0.7033 | 0.2931  | 0.0838  |
| 8                       | -2.1283 | 0.6207  | 0.1199  | -0.6766 |
| 1                       | 0.5879  | 1.7270  | 1.0135  | 0.3665  |
| 1                       | 0.9510  | 2.1260  | -0.5281 | 0.3816  |
| 1                       | 0.3313  | 0.1561  | -1.4271 | 0.2269  |
| 1                       | 1.2037  | -0.6691 | 1.3859  | 0.1609  |
| 9                       | 2.5261  | -0.2561 | -0.0845 | -0.4015 |
| 1                       | 1.1331  | -1.7315 | -0.0457 | 0.1945  |
| 1                       | -1.6371 | 1.4709  | 0.0781  | 0.5009  |

| <b>2Fc</b> -423.113427 |         |         |         |         |
|------------------------|---------|---------|---------|---------|
|                        | x       | y       | z       | NBO     |
| 1                      | 1.3505  | -0.1742 | 1.4024  | 0.1774  |
| 6                      | 1.4662  | 0.2974  | 0.4238  | 0.0858  |
| 6                      | 0.1152  | 0.5355  | -0.2610 | -0.1717 |
| 6                      | -0.8782 | -0.6202 | -0.0122 | 0.7871  |
| 7                      | -0.5373 | 1.8101  | 0.0681  | -0.8701 |
| 8                      | -2.1669 | -0.2590 | -0.1394 | -0.6809 |
| 1                      | 1.9988  | 1.2474  | 0.5247  | 0.1570  |
| 9                      | 2.2604  | -0.5405 | -0.3581 | -0.3861 |
| 1                      | 0.3035  | 0.5341  | -1.3403 | 0.2312  |
| 8                      | -0.5396 | -1.7414 | 0.2465  | -0.5660 |
| 1                      | -2.1726 | 0.7127  | -0.2510 | 0.4973  |
| 1                      | -0.5181 | 2.0065  | 1.0649  | 0.3651  |
| 1                      | -0.1122 | 2.5931  | -0.4149 | 0.3738  |

| <b>3Fa</b> -423.1187987 |         |         |         |         |
|-------------------------|---------|---------|---------|---------|
|                         | x       | y       | z       | NBO     |
| 8                       | -1.4763 | -1.3121 | -0.4016 | -0.6040 |
| 6                       | -1.0410 | -0.2243 | -0.1199 | 0.7943  |
| 6                       | 0.2737  | 0.3429  | -0.6859 | -0.1594 |
| 7                       | 0.6632  | 1.6835  | -0.2885 | -0.8353 |
| 6                       | 1.4035  | -0.6376 | -0.3949 | 0.0933  |
| 8                       | -1.6790 | 0.6326  | 0.7064  | -0.6873 |
| 1                       | 0.8637  | 1.7149  | 0.7057  | 0.3664  |
| 1                       | -0.0758 | 2.3527  | -0.4694 | 0.3625  |
| 1                       | 0.1346  | 0.3234  | -1.7743 | 0.2269  |
| 1                       | 1.1360  | -1.6514 | -0.6920 | 0.1832  |
| 9                       | 1.6550  | -0.6508 | 0.9887  | -0.4023 |
| 1                       | 2.3182  | -0.3070 | -0.8880 | 0.1751  |
| 1                       | -2.4892 | 0.1912  | 1.0048  | 0.4866  |



| <b>3Fb-1</b> -423.117889 |         |         |         |         |
|--------------------------|---------|---------|---------|---------|
|                          | x       | y       | z       | NBO     |
| 9                        | -2.5374 | -0.2163 | 0.1952  | -0.4044 |
| 8                        | 1.4180  | -1.4529 | -0.2021 | -0.5937 |
| 6                        | -0.2216 | 0.2688  | 0.2940  | -0.1513 |
| 7                        | -0.3902 | 1.5385  | -0.4110 | -0.8442 |
| 6                        | 1.1680  | -0.3017 | 0.0490  | 0.8112  |
| 6                        | -1.2774 | -0.7250 | -0.1674 | 0.0933  |
| 8                        | 2.1229  | 0.6448  | 0.1915  | -0.6903 |
| 1                        | -0.3127 | 0.3618  | 1.3912  | 0.1991  |
| 1                        | -1.3149 | 1.9116  | -0.2236 | 0.3667  |
| 1                        | 0.2967  | 2.2191  | -0.1068 | 0.3683  |
| 1                        | -1.2668 | -0.8327 | -1.2530 | 0.1763  |
| 1                        | -1.1560 | -1.6942 | 0.3144  | 0.1809  |
| 1                        | 2.9802  | 0.2225  | 0.0292  | 0.4881  |

| <b>3Fb-2</b> -423.1166286 |         |         |         |         |
|---------------------------|---------|---------|---------|---------|
|                           | x       | y       | z       | NBO     |
| 7                         | 0.4820  | 1.5515  | -0.5094 | -0.8353 |
| 6                         | 0.2430  | 0.1156  | -0.4663 | -0.1518 |
| 6                         | -1.2043 | -0.2110 | -0.1241 | 0.8040  |
| 8                         | -1.8128 | -1.1581 | -0.5501 | -0.5872 |
| 8                         | -1.7236 | 0.6554  | 0.7767  | -0.6928 |
| 6                         | 1.1475  | -0.6652 | 0.5032  | 0.0860  |
| 1                         | 0.2484  | 1.9940  | 0.3735  | 0.3620  |
| 1                         | 1.4597  | 1.7330  | -0.7102 | 0.3660  |
| 1                         | 0.4106  | -0.2936 | -1.4656 | 0.2226  |
| 1                         | 0.9594  | -1.7401 | 0.4530  | 0.1746  |
| 9                         | 2.4800  | -0.4491 | 0.1265  | -0.3994 |
| 1                         | 1.0373  | -0.3060 | 1.5301  | 0.1628  |
| 1                         | -2.6353 | 0.3793  | 0.9565  | 0.4886  |

| <b>3Fb-3</b> -423.1149888 |         |         |         |         |
|---------------------------|---------|---------|---------|---------|
|                           | x       | y       | z       | NBO     |
| 1                         | -2.9575 | 0.0048  | -0.5130 | 0.4841  |
| 6                         | 1.3055  | -0.7034 | 0.0390  | 0.0974  |
| 6                         | 0.2327  | 0.3482  | -0.2236 | -0.1525 |
| 6                         | -1.1508 | -0.2738 | -0.0367 | 0.7862  |
| 8                         | -1.4066 | -1.2139 | 0.6756  | -0.6029 |

|   |         |         |         |         |
|---|---------|---------|---------|---------|
| 8 | -2.0998 | 0.4052  | -0.7245 | -0.6882 |
| 7 | 0.4204  | 1.5133  | 0.6417  | -0.8149 |
| 9 | 2.5415  | -0.2280 | -0.3985 | -0.3899 |
| 1 | 1.3888  | -0.9315 | 1.1040  | 0.1696  |
| 1 | 0.3254  | 0.6843  | -1.2592 | 0.2214  |
| 1 | -0.1835 | 2.2819  | 0.3735  | 0.3643  |
| 1 | 0.2463  | 1.2877  | 1.6161  | 0.3550  |
| 1 | 1.0905  | -1.6237 | -0.5083 | 0.1705  |

| <b>3Fb-4</b> -423.1145609 |         |         |         |         |
|---------------------------|---------|---------|---------|---------|
|                           | x       | y       | z       | NBO     |
| 1                         | -2.4799 | -0.1810 | 1.2443  | 0.4869  |
| 6                         | 1.2014  | -0.6301 | 0.4291  | 0.0982  |
| 6                         | 0.2547  | 0.2195  | -0.4215 | -0.1524 |
| 6                         | -1.1919 | -0.2001 | -0.1440 | 0.7859  |
| 8                         | -1.9424 | -0.7109 | -0.9344 | -0.5864 |
| 8                         | -1.5557 | 0.0899  | 1.1333  | -0.7041 |
| 7                         | 0.5107  | 1.6408  | -0.2202 | -0.8222 |
| 9                         | 2.4976  | -0.5379 | -0.0724 | -0.3868 |
| 1                         | 1.2164  | -0.2847 | 1.4658  | 0.1680  |
| 1                         | 0.4406  | -0.0222 | -1.4693 | 0.2251  |
| 1                         | 0.0453  | 2.2093  | -0.9182 | 0.3616  |
| 1                         | 0.2129  | 1.9493  | 0.6993  | 0.3598  |
| 1                         | 0.9117  | -1.6844 | 0.3982  | 0.1663  |

| <b>3Fb-5</b> -423.1144466 |         |         |         |         |
|---------------------------|---------|---------|---------|---------|
|                           | x       | y       | z       | NBO     |
| 8                         | -2.0881 | 0.5983  | 0.1968  | -0.6895 |
| 6                         | -1.1513 | -0.3363 | -0.0842 | 0.7875  |
| 6                         | 0.2427  | 0.2702  | -0.3313 | -0.1588 |
| 7                         | 0.4184  | 1.6810  | -0.0426 | -0.8238 |
| 6                         | 1.2784  | -0.5795 | 0.4103  | 0.0983  |
| 8                         | -1.4060 | -1.5129 | -0.1503 | -0.6022 |
| 1                         | 0.4276  | 0.1152  | -1.4011 | 0.2309  |
| 1                         | 0.1647  | 1.9002  | 0.9149  | 0.3541  |
| 1                         | -0.1523 | 2.2593  | -0.6476 | 0.3630  |
| 1                         | 1.0615  | -1.6403 | 0.2877  | 0.1849  |
| 1                         | 1.3028  | -0.3235 | 1.4744  | 0.1573  |
| 9                         | 2.5479  | -0.3354 | -0.1088 | -0.3884 |
| 1                         | -2.9304 | 0.1309  | 0.3091  | 0.4867  |

| <b>3Fc</b> -423.1170466 |         |         |         |         |
|-------------------------|---------|---------|---------|---------|
|                         | x       | y       | z       | NBO     |
| 8                       | -1.7208 | -0.7226 | -0.9382 | -0.5859 |
| 6                       | -0.9592 | -0.2716 | -0.1228 | 0.7919  |
| 6                       | 0.2670  | 0.5879  | -0.4348 | -0.1503 |
| 7                       | 0.1102  | 1.9820  | -0.0152 | -0.8290 |
| 6                       | 1.5370  | 0.0413  | 0.2117  | 0.0945  |
| 8                       | -1.1360 | -0.4223 | 1.2152  | -0.7038 |
| 1                       | -0.1907 | 2.0472  | 0.9518  | 0.3614  |
| 1                       | -0.5667 | 2.4680  | -0.5920 | 0.3664  |
| 1                       | 0.3823  | 0.5628  | -1.5194 | 0.2192  |
| 9                       | 1.7168  | -1.2979 | -0.1539 | -0.3940 |
| 1                       | 1.4771  | 0.0815  | 1.3016  | 0.1680  |
| 1                       | 2.3989  | 0.6115  | -0.1373 | 0.1745  |
| 1                       | -1.9383 | -0.9495 | 1.3469  | 0.4873  |

| <b>4Fa</b> -423.1087448 |         |         |         |         |
|-------------------------|---------|---------|---------|---------|
|                         | x       | y       | z       | NBO     |
| 8                       | -1.6622 | -1.1621 | -0.3216 | -0.6743 |
| 6                       | -1.0768 | 0.0128  | 0.0359  | 0.7842  |
| 6                       | 0.2609  | 0.3553  | -0.6689 | -0.1687 |
| 6                       | 1.3324  | -0.6985 | -0.4026 | 0.0901  |
| 7                       | 0.7793  | 1.6673  | -0.3368 | -0.8316 |
| 1                       | 1.0378  | -1.7005 | -0.7283 | 0.1531  |
| 9                       | 1.5915  | -0.7704 | 0.9702  | -0.3946 |
| 1                       | 2.2589  | -0.4079 | -0.8998 | 0.1845  |
| 1                       | 0.0645  | 0.3232  | -1.7504 | 0.2134  |
| 8                       | -1.6109 | 0.7350  | 0.8257  | -0.5582 |
| 1                       | -1.1277 | -1.6410 | -0.9664 | 0.4668  |
| 1                       | 0.9967  | 1.7083  | 0.6548  | 0.3689  |
| 1                       | 0.0757  | 2.3791  | -0.5027 | 0.3664  |

| <b>4Fb</b> -423.1070317 |         |         |         |         |
|-------------------------|---------|---------|---------|---------|
|                         | x       | y       | z       | NBO     |
| 8                       | -1.8879 | 0.6295  | 0.7021  | -0.5648 |
| 6                       | -1.2161 | -0.0904 | 0.0190  | 0.7777  |
| 6                       | 0.2372  | 0.2421  | -0.3864 | -0.1640 |
| 7                       | 0.5296  | 1.6623  | -0.3911 | -0.8268 |
| 6                       | 1.1828  | -0.4990 | 0.5703  | 0.0974  |
| 8                       | -1.7055 | -1.2834 | -0.4097 | -0.6732 |
| 1                       | 0.1016  | 2.1076  | 0.4162  | 0.3685  |
| 1                       | 0.1517  | 2.1131  | -1.2168 | 0.3601  |
| 1                       | 0.4273  | -0.1546 | -1.3903 | 0.2062  |
| 1                       | 0.8503  | -1.5234 | 0.7616  | 0.1599  |
| 1                       | 1.2624  | 0.0412  | 1.5167  | 0.1744  |
| 9                       | 2.4554  | -0.5753 | 0.0095  | -0.3876 |
| 1                       | -1.0764 | -1.7275 | -0.9921 | 0.4721  |

| <b>4Fc -423.1151317</b> |         |         |         |         |
|-------------------------|---------|---------|---------|---------|
|                         | x       | y       | z       | NBO     |
| 1                       | 1.6708  | 1.6483  | -0.2482 | 0.3896  |
| 7                       | 0.7099  | 1.8662  | -0.0003 | -0.8549 |
| 6                       | 0.0092  | 0.6439  | 0.3622  | -0.1686 |
| 6                       | 0.8755  | -0.5875 | 0.0320  | 0.7953  |
| 8                       | 2.0397  | -0.5000 | -0.2516 | -0.5777 |
| 6                       | -1.3339 | 0.6401  | -0.3772 | 0.0862  |
| 1                       | 0.7127  | 2.5422  | 0.7523  | 0.3628  |
| 8                       | 0.2654  | -1.7835 | 0.1046  | -0.6755 |
| 1                       | -0.6859 | -1.6773 | 0.2686  | 0.4930  |
| 1                       | -0.2056 | 0.5804  | 1.4391  | 0.2059  |
| 9                       | -2.1232 | -0.4622 | 0.0517  | -0.4138 |
| 1                       | -1.2017 | 0.5481  | -1.4560 | 0.1785  |
| 1                       | -1.8955 | 1.5439  | -0.1449 | 0.1794  |

### 3-Fluoroalanines, CPCM

| <b>1Fa<sub>aq</sub></b> -423.1452346 |         |         |         |         |
|--------------------------------------|---------|---------|---------|---------|
|                                      | x       | y       | z       | NBO     |
| 1                                    | 0.9511  | 1.7276  | 0.7314  | 0.3793  |
| 7                                    | 0.8400  | 1.6680  | -0.2817 | -0.8699 |
| 6                                    | 0.2880  | 0.3791  | -0.6597 | -0.1712 |
| 6                                    | -1.0513 | 0.0345  | 0.0131  | 0.8147  |
| 8                                    | -1.5773 | 0.6978  | 0.8796  | -0.6553 |
| 6                                    | 1.3016  | -0.7342 | -0.4344 | 0.0873  |
| 1                                    | 0.2024  | 2.4177  | -0.5505 | 0.3845  |
| 8                                    | -1.5814 | -1.0890 | -0.4856 | -0.7093 |
| 1                                    | -2.4415 | -1.2803 | -0.0254 | 0.5392  |
| 1                                    | 0.0913  | 0.3812  | -1.7429 | 0.2537  |
| 1                                    | 0.9296  | -1.7024 | -0.7699 | 0.1876  |
| 9                                    | 1.5757  | -0.8534 | 0.9540  | -0.4257 |
| 1                                    | 2.2449  | -0.4864 | -0.9230 | 0.1850  |

| <b>1Fb-1<sub>aq</sub></b> -423.1429371 |         |         |         |         |
|----------------------------------------|---------|---------|---------|---------|
|                                        | x       | y       | z       | NBO     |
| 9                                      | 2.4948  | -0.4237 | -0.0494 | -0.4235 |
| 8                                      | -2.0625 | 0.7580  | 0.2681  | -0.6482 |
| 6                                      | 0.2291  | 0.2619  | -0.3413 | -0.1631 |
| 7                                      | 0.5323  | 1.6307  | 0.0615  | -0.8786 |
| 6                                      | -1.2283 | -0.0663 | -0.0340 | 0.8239  |
| 6                                      | 1.1686  | -0.7151 | 0.3576  | 0.0875  |
| 8                                      | -1.4918 | -1.3692 | -0.1813 | -0.7051 |
| 1                                      | 0.3317  | 0.0909  | -1.4300 | 0.2273  |
| 1                                      | 1.4301  | 1.9088  | -0.3353 | 0.3832  |
| 1                                      | -0.1691 | 2.2694  | -0.3139 | 0.3862  |
| 1                                      | 1.1378  | -0.5896 | 1.4425  | 0.1788  |
| 1                                      | 0.9685  | -1.7482 | 0.0764  | 0.1892  |
| 1                                      | -2.4597 | -1.5273 | -0.0142 | 0.5423  |

| <b>1Fb-2<sub>aq</sub></b> -423.1431169 |         |         |         |         |
|----------------------------------------|---------|---------|---------|---------|
|                                        | x       | y       | z       | NBO     |
| 7                                      | 0.5479  | 1.6364  | -0.3277 | -0.8691 |
| 6                                      | 0.2328  | 0.2183  | -0.4045 | -0.1648 |
| 6                                      | -1.2252 | -0.0260 | -0.0246 | 0.8201  |
| 8                                      | -1.6259 | -1.2522 | -0.3812 | -0.7045 |
| 8                                      | -1.9315 | 0.7726  | 0.5493  | -0.6459 |
| 6                                      | 1.1185  | -0.6918 | 0.4601  | 0.0789  |

|   |         |         |         |         |
|---|---------|---------|---------|---------|
| 1 | 0.4642  | 1.9783  | 0.6314  | 0.3786  |
| 1 | 1.5114  | 1.7898  | -0.6258 | 0.3841  |
| 1 | 0.3506  | -0.1092 | -1.4466 | 0.2407  |
| 1 | 0.8732  | -1.7474 | 0.3320  | 0.1865  |
| 9 | 2.4624  | -0.5262 | 0.0494  | -0.4218 |
| 1 | 1.0736  | -0.4099 | 1.5160  | 0.1764  |
| 1 | -2.5668 | -1.3876 | -0.0896 | 0.5407  |

| <b>1Fb-3<sub>ag</sub></b> -423.1434418 |         |         |         |         |
|----------------------------------------|---------|---------|---------|---------|
|                                        | x       | y       | z       | NBO     |
| 8                                      | -1.5075 | -1.3513 | -0.3472 | -0.7072 |
| 6                                      | -1.2129 | -0.0882 | -0.0180 | 0.8108  |
| 6                                      | 0.2450  | 0.2665  | -0.3626 | -0.1649 |
| 7                                      | 0.5687  | 1.6748  | -0.2306 | -0.8674 |
| 6                                      | 1.1826  | -0.5928 | 0.4862  | 0.0895  |
| 1                                      | 0.3030  | 2.0204  | 0.6934  | 0.3781  |
| 1                                      | 0.0480  | 2.2251  | -0.9143 | 0.3845  |
| 1                                      | 0.3882  | -0.0348 | -1.4098 | 0.2442  |
| 8                                      | -2.0060 | 0.6801  | 0.4797  | -0.6520 |
| 1                                      | 0.8934  | -1.6438 | 0.4676  | 0.1869  |
| 1                                      | 1.2292  | -0.2291 | 1.5167  | 0.1769  |
| 9                                      | 2.4925  | -0.5180 | -0.0355 | -0.4193 |
| 1                                      | -2.4550 | -1.5427 | -0.1135 | 0.5400  |

| <b>1Fc<sub>aq</sub></b> -423.1433629 |         |         |         |         |
|--------------------------------------|---------|---------|---------|---------|
|                                      | x       | y       | z       | NBO     |
| 1                                    | 0.1114  | 2.2050  | 0.7187  | 0.3810  |
| 7                                    | 0.3535  | 1.9780  | -0.2477 | -0.8636 |
| 6                                    | 0.3132  | 0.5341  | -0.4654 | -0.1576 |
| 6                                    | -0.9580 | -0.1243 | 0.0844  | 0.8107  |
| 8                                    | -1.3663 | 0.0454  | 1.2153  | -0.6654 |
| 6                                    | 1.5415  | -0.0661 | 0.2156  | 0.0909  |
| 1                                    | -0.3229 | 2.4481  | -0.8505 | 0.3894  |
| 8                                    | -1.5727 | -0.8960 | -0.8158 | -0.6968 |
| 1                                    | -2.3837 | -1.2998 | -0.4040 | 0.5375  |
| 1                                    | 0.3705  | 0.3369  | -1.5403 | 0.2311  |
| 9                                    | 1.5433  | -1.4725 | 0.0627  | -0.4195 |
| 1                                    | 1.5413  | 0.1403  | 1.2891  | 0.1774  |
| 1                                    | 2.4510  | 0.3187  | -0.2471 | 0.1849  |

| <b>2Fa-1<sub>aq</sub></b> -423.1444436 |         |         |         |         |
|----------------------------------------|---------|---------|---------|---------|
|                                        | x       | y       | z       | NBO     |
| 6                                      | -1.4517 | -0.4858 | 0.4681  | 0.0791  |
| 6                                      | -0.2087 | 0.3707  | 0.6395  | -0.1826 |
| 6                                      | 1.0432  | -0.3379 | 0.0848  | 0.8127  |
| 8                                      | 1.8799  | 0.4675  | -0.5631 | -0.6991 |
| 7                                      | -0.2915 | 1.7208  | 0.0823  | -0.8961 |
| 1                                      | -0.9185 | 1.7661  | -0.7231 | 0.3957  |
| 1                                      | -0.6117 | 2.3971  | 0.7749  | 0.4061  |
| 1                                      | -0.0295 | 0.4464  | 1.7235  | 0.2668  |
| 8                                      | 1.2780  | -1.5162 | 0.2472  | -0.6603 |
| 1                                      | -1.2997 | -1.4960 | 0.8499  | 0.1934  |
| 9                                      | -1.7550 | -0.5997 | -0.9128 | -0.4231 |
| 1                                      | -2.3146 | -0.0173 | 0.9449  | 0.1849  |
| 1                                      | 1.4492  | 1.3634  | -0.5583 | 0.5225  |

| <b>2Fa-2<sub>aq</sub></b> -423.1389029 |         |         |         |         |
|----------------------------------------|---------|---------|---------|---------|
|                                        | x       | y       | z       | NBO     |
| 1                                      | -1.2636 | 1.3596  | 1.0318  | 0.5261  |
| 6                                      | 1.3772  | -0.6614 | -0.3949 | 0.0882  |
| 6                                      | 0.2585  | 0.3264  | -0.6928 | -0.1795 |
| 6                                      | -1.0623 | -0.2160 | -0.0987 | 0.8115  |
| 8                                      | -1.7134 | 0.5152  | 0.8101  | -0.6941 |
| 8                                      | -1.5205 | -1.2828 | -0.4475 | -0.6572 |
| 7                                      | 0.6619  | 1.6757  | -0.3515 | -0.8846 |

|   |         |         |         |         |
|---|---------|---------|---------|---------|
| 9 | 1.6327  | -0.6755 | 1.0015  | -0.4249 |
| 1 | 1.1078  | -1.6777 | -0.6823 | 0.1898  |
| 1 | 0.1019  | 0.2753  | -1.7808 | 0.2592  |
| 1 | -0.0056 | 2.3811  | -0.6617 | 0.3935  |
| 1 | 0.8632  | 1.8041  | 0.6408  | 0.3858  |
| 1 | 2.2996  | -0.3451 | -0.8835 | 0.1862  |

|                                        |         |         |         |         |
|----------------------------------------|---------|---------|---------|---------|
| <b>2Fa-3<sub>aq</sub></b> -423.1389025 |         |         |         |         |
|                                        | x       | y       | z       | NBO     |
| 1                                      | -1.2863 | 1.3656  | 1.0116  | 0.5260  |
| 6                                      | 1.3802  | -0.6554 | -0.3960 | 0.0883  |
| 6                                      | 0.2572  | 0.3284  | -0.6908 | -0.1797 |
| 6                                      | -1.0613 | -0.2213 | -0.0986 | 0.8116  |
| 8                                      | -1.7264 | 0.5143  | 0.7965  | -0.6941 |
| 8                                      | -1.5066 | -1.2966 | -0.4378 | -0.6573 |
| 7                                      | 0.6560  | 1.6777  | -0.3445 | -0.8848 |
| 9                                      | 1.6383  | -0.6692 | 1.0000  | -0.4250 |
| 1                                      | 1.1142  | -1.6725 | -0.6834 | 0.1898  |
| 1                                      | 0.1008  | 0.2806  | -1.7791 | 0.2595  |
| 1                                      | -0.0096 | 2.3831  | -0.6589 | 0.3935  |
| 1                                      | 0.8505  | 1.8050  | 0.6492  | 0.3860  |
| 1                                      | 2.3005  | -0.3350 | -0.8858 | 0.1861  |

|                                      |         |         |         |         |
|--------------------------------------|---------|---------|---------|---------|
| <b>2Fb<sub>aq</sub></b> -423.1435629 |         |         |         |         |
|                                      | x       | y       | z       | NBO     |
| 8                                    | -1.4845 | -1.5174 | -0.0716 | -0.6593 |
| 6                                    | -1.2030 | -0.3376 | -0.0659 | 0.8159  |
| 6                                    | 0.2110  | 0.2096  | -0.3331 | -0.1776 |
| 7                                    | 0.2631  | 1.6253  | 0.0278  | -0.8937 |
| 6                                    | 1.2543  | -0.6787 | 0.3331  | 0.0809  |
| 8                                    | -2.1161 | 0.6062  | 0.1410  | -0.6987 |
| 1                                    | 0.6021  | 1.7686  | 0.9820  | 0.3945  |
| 1                                    | 0.8648  | 2.1532  | -0.6031 | 0.4062  |
| 1                                    | 0.3420  | 0.1281  | -1.4228 | 0.2570  |
| 1                                    | 1.2380  | -0.5736 | 1.4219  | 0.1785  |
| 9                                    | 2.5376  | -0.2745 | -0.1001 | -0.4198 |
| 1                                    | 1.1291  | -1.7240 | 0.0510  | 0.1932  |
| 1                                    | -1.6253 | 1.4703  | 0.1173  | 0.5229  |



| <b>2Fc<sub>aq</sub></b> -423.1409855 |         |         |         |         |
|--------------------------------------|---------|---------|---------|---------|
|                                      | x       | y       | z       | NBO     |
| 1                                    | 1.3549  | 0.1240  | 1.4398  | 0.1813  |
| 6                                    | 1.4525  | 0.4129  | 0.3901  | 0.0801  |
| 6                                    | 0.0954  | 0.5497  | -0.3031 | -0.1768 |
| 6                                    | -0.8428 | -0.6345 | -0.0252 | 0.8128  |
| 7                                    | -0.6007 | 1.7976  | 0.0119  | -0.8894 |
| 8                                    | -2.1381 | -0.3136 | -0.0048 | -0.7006 |
| 1                                    | 1.9953  | 1.3570  | 0.3090  | 0.1822  |
| 9                                    | 2.2435  | -0.5703 | -0.2435 | -0.4163 |
| 1                                    | 0.2732  | 0.5274  | -1.3890 | 0.2569  |
| 8                                    | -0.4732 | -1.7770 | 0.1337  | -0.6516 |
| 1                                    | -2.1923 | 0.6702  | -0.0980 | 0.5240  |
| 1                                    | -0.5055 | 2.0548  | 0.9978  | 0.3932  |
| 1                                    | -0.2525 | 2.5726  | -0.5529 | 0.4042  |

| <b>3Fa<sub>aq</sub></b> -423.1439201 |         |         |         |         |
|--------------------------------------|---------|---------|---------|---------|
|                                      | x       | y       | z       | NBO     |
| 8                                    | -1.4796 | -1.2977 | -0.4515 | -0.6687 |
| 6                                    | -1.0399 | -0.2151 | -0.1194 | 0.8150  |
| 6                                    | 0.2755  | 0.3575  | -0.6796 | -0.1704 |
| 7                                    | 0.6487  | 1.7035  | -0.2756 | -0.8712 |
| 6                                    | 1.4074  | -0.6210 | -0.4055 | 0.0884  |
| 8                                    | -1.6491 | 0.5947  | 0.7466  | -0.6981 |
| 1                                    | 0.7313  | 1.7690  | 0.7393  | 0.3795  |
| 1                                    | -0.0669 | 2.3730  | -0.5580 | 0.3850  |
| 1                                    | 0.1382  | 0.3454  | -1.7720 | 0.2543  |
| 1                                    | 1.1617  | -1.6307 | -0.7351 | 0.1876  |
| 9                                    | 1.6477  | -0.6869 | 0.9930  | -0.4263 |
| 1                                    | 2.3301  | -0.2694 | -0.8688 | 0.1847  |
| 1                                    | -2.4930 | 0.1657  | 1.0515  | 0.5401  |

| <b>3Fb-1<sub>aq</sub></b> -423.1417317 |         |         |         |         |
|----------------------------------------|---------|---------|---------|---------|
|                                        | x       | y       | z       | NBO     |
| 9                                      | -2.5440 | -0.2424 | 0.1607  | -0.4241 |
| 8                                      | 1.4158  | -1.4767 | -0.1056 | -0.6566 |
| 6                                      | -0.2204 | 0.2650  | 0.3000  | -0.1613 |
| 7                                      | -0.3958 | 1.5765  | -0.3287 | -0.8786 |
| 6                                      | 1.1750  | -0.2976 | 0.0537  | 0.8276  |
| 6                                      | -1.2622 | -0.7138 | -0.2192 | 0.0878  |
| 8                                      | 2.1142  | 0.6496  | 0.0831  | -0.7009 |
| 1                                      | -0.3170 | 0.2982  | 1.4031  | 0.2265  |
| 1                                      | -1.3125 | 1.9464  | -0.0727 | 0.3821  |
| 1                                      | 0.2912  | 2.2365  | 0.0356  | 0.3859  |
| 1                                      | -1.2549 | -0.7663 | -1.3101 | 0.1792  |
| 1                                      | -1.1407 | -1.7040 | 0.2177  | 0.1896  |
| 1                                      | 3.0067  | 0.2300  | -0.0466 | 0.5425  |

| <b>3Fb-2<sub>aq</sub></b> -423.1417008 |         |         |         |         |
|----------------------------------------|---------|---------|---------|---------|
|                                        | x       | y       | z       | NBO     |
| 7                                      | 0.4500  | 1.6149  | -0.3697 | -0.8710 |
| 6                                      | 0.2394  | 0.1744  | -0.4281 | -0.1612 |
| 6                                      | -1.1979 | -0.2357 | -0.1146 | 0.8204  |
| 8                                      | -1.6501 | -1.3218 | -0.4159 | -0.6603 |
| 8                                      | -1.8842 | 0.6910  | 0.5532  | -0.6942 |
| 6                                      | 1.1607  | -0.6549 | 0.4809  | 0.0809  |
| 1                                      | 0.3479  | 1.9649  | 0.5846  | 0.3784  |
| 1                                      | 1.4003  | 1.8312  | -0.6720 | 0.3839  |
| 1                                      | 0.4211  | -0.1579 | -1.4583 | 0.2405  |
| 1                                      | 0.9717  | -1.7257 | 0.3841  | 0.1853  |
| 9                                      | 2.4981  | -0.4306 | 0.0832  | -0.4207 |
| 1                                      | 1.0832  | -0.3412 | 1.5258  | 0.1764  |
| 1                                      | -2.7958 | 0.3427  | 0.7469  | 0.5415  |

| <b>3Fb-3<sub>aq</sub></b> -423.1420554 |         |         |         |         |
|----------------------------------------|---------|---------|---------|---------|
|                                        | x       | y       | z       | NBO     |
| 1                                      | -2.9920 | 0.0244  | -0.4997 | 0.5385  |
| 6                                      | 1.2910  | -0.7128 | 0.0271  | 0.0880  |
| 6                                      | 0.2302  | 0.3481  | -0.2300 | -0.1599 |
| 6                                      | -1.1586 | -0.2663 | -0.0415 | 0.8102  |

|   |         |         |         |         |
|---|---------|---------|---------|---------|
| 8 | -1.3979 | -1.2233 | 0.6682  | -0.6608 |
| 8 | -2.0997 | 0.4116  | -0.7077 | -0.7017 |
| 7 | 0.4319  | 1.5103  | 0.6413  | -0.8576 |
| 9 | 2.5502  | -0.2209 | -0.3830 | -0.4208 |
| 1 | 1.3714  | -0.9592 | 1.0880  | 0.1798  |
| 1 | 0.3151  | 0.6839  | -1.2702 | 0.2361  |
| 1 | -0.1720 | 2.2838  | 0.3607  | 0.3865  |
| 1 | 0.2098  | 1.2806  | 1.6128  | 0.3786  |
| 1 | 1.0983  | -1.6177 | -0.5524 | 0.1831  |

|                                        |         |         |         |         |
|----------------------------------------|---------|---------|---------|---------|
| <b>3Fb-4<sub>aq</sub></b> -423.1418378 |         |         |         |         |
|                                        | x       | y       | z       | NBO     |
| 1                                      | -2.4831 | -0.3230 | 1.2736  | 0.5414  |
| 6                                      | 1.1935  | -0.6735 | 0.3649  | 0.0870  |
| 6                                      | 0.2505  | 0.2466  | -0.4050 | -0.1570 |
| 6                                      | -1.1997 | -0.1802 | -0.1417 | 0.8093  |
| 8                                      | -1.9689 | -0.5600 | -1.0000 | -0.6532 |
| 8                                      | -1.5303 | -0.0660 | 1.1501  | -0.7096 |
| 7                                      | 0.5183  | 1.6486  | -0.0909 | -0.8617 |
| 9                                      | 2.5083  | -0.5145 | -0.1239 | -0.4183 |
| 1                                      | 1.2147  | -0.4300 | 1.4298  | 0.1809  |
| 1                                      | 0.4196  | 0.0912  | -1.4756 | 0.2332  |
| 1                                      | -0.0330 | 2.2644  | -0.6903 | 0.3861  |
| 1                                      | 0.2776  | 1.8630  | 0.8782  | 0.3789  |
| 1                                      | 0.9281  | -1.7246 | 0.2255  | 0.1830  |

|                                        |         |         |         |         |
|----------------------------------------|---------|---------|---------|---------|
| <b>3Fb-5<sub>aq</sub></b> -423.1420085 |         |         |         |         |
|                                        | x       | y       | z       | NBO     |
| 8                                      | -2.0497 | 0.6057  | 0.2863  | -0.6971 |
| 6                                      | -1.1632 | -0.3176 | -0.0860 | 0.8122  |
| 6                                      | 0.2433  | 0.2538  | -0.3505 | -0.1649 |
| 7                                      | 0.4435  | 1.6734  | -0.1148 | -0.8685 |
| 6                                      | 1.2521  | -0.5796 | 0.4384  | 0.0907  |
| 8                                      | -1.4372 | -1.4933 | -0.2248 | -0.6666 |
| 1                                      | 0.4225  | 0.0495  | -1.4168 | 0.2464  |
| 1                                      | 0.1703  | 1.9274  | 0.8358  | 0.3777  |
| 1                                      | -0.1297 | 2.2284  | -0.7501 | 0.3850  |
| 1                                      | 1.0496  | -1.6456 | 0.3390  | 0.1882  |
| 1                                      | 1.2685  | -0.2909 | 1.4934  | 0.1758  |
| 9                                      | 2.5500  | -0.3544 | -0.0688 | -0.4198 |
| 1                                      | -2.9338 | 0.1690  | 0.4179  | 0.5409  |

| <b>3Fc<sub>aq</sub></b> -423.1428936 |         |         |         |         |
|--------------------------------------|---------|---------|---------|---------|
|                                      | x       | y       | z       | NBO     |
| 8                                    | -1.6967 | -0.7450 | -0.9447 | -0.6571 |
| 6                                    | -0.9582 | -0.2642 | -0.1096 | 0.8106  |
| 6                                    | 0.2703  | 0.5899  | -0.4388 | -0.1568 |
| 7                                    | 0.1275  | 1.9903  | -0.0371 | -0.8609 |
| 6                                    | 1.5343  | 0.0420  | 0.2139  | 0.0876  |
| 8                                    | -1.1527 | -0.3903 | 1.2082  | -0.7107 |
| 1                                    | -0.1464 | 2.0715  | 0.9434  | 0.3814  |
| 1                                    | -0.5878 | 2.4541  | -0.5983 | 0.3909  |
| 1                                    | 0.3859  | 0.5522  | -1.5266 | 0.2305  |
| 9                                    | 1.6956  | -1.3216 | -0.1314 | -0.4202 |
| 1                                    | 1.4844  | 0.0938  | 1.3037  | 0.1795  |
| 1                                    | 2.4087  | 0.5807  | -0.1539 | 0.1844  |
| 1                                    | -1.9812 | -0.9143 | 1.3726  | 0.5408  |

| <b>4Fa<sub>aq</sub></b> -423.1403441 |         |         |         |         |
|--------------------------------------|---------|---------|---------|---------|
|                                      | x       | y       | z       | NBO     |
| 8                                    | -1.8763 | -0.8794 | -0.4200 | -0.7086 |
| 6                                    | -1.0509 | 0.0508  | 0.0887  | 0.8085  |
| 6                                    | 0.2497  | 0.3346  | -0.6891 | -0.1763 |
| 6                                    | 1.2524  | -0.7908 | -0.4485 | 0.0865  |
| 7                                    | 0.8516  | 1.6235  | -0.3982 | -0.8675 |
| 1                                    | 0.8479  | -1.7718 | -0.7078 | 0.1835  |
| 9                                    | 1.6033  | -0.8375 | 0.9219  | -0.4232 |
| 1                                    | 2.1684  | -0.5933 | -1.0074 | 0.1888  |
| 1                                    | 0.0090  | 0.2912  | -1.7629 | 0.2479  |
| 8                                    | -1.3406 | 0.5988  | 1.1271  | -0.6449 |
| 1                                    | -1.6198 | -1.1776 | -1.3286 | 0.5379  |
| 1                                    | 1.0127  | 1.7235  | 0.6050  | 0.3816  |
| 1                                    | 0.2203  | 2.3776  | -0.6719 | 0.3857  |

| <b>4Fb<sub>aq</sub></b> -423.1391095 |         |         |         |         |
|--------------------------------------|---------|---------|---------|---------|
|                                      | x       | y       | z       | NBO     |
| 8                                    | -1.8075 | 0.6352  | 0.8187  | -0.6461 |
| 6                                    | -1.2140 | -0.0745 | 0.0382  | 0.8038  |
| 6                                    | 0.2377  | 0.2010  | -0.4072 | -0.1680 |
| 7                                    | 0.5813  | 1.6109  | -0.4663 | -0.8647 |
| 6                                    | 1.1625  | -0.5405 | 0.5610  | 0.0883  |
| 8                                    | -1.8139 | -1.1691 | -0.4511 | -0.7037 |

|   |         |         |         |         |
|---|---------|---------|---------|---------|
| 1 | 0.3325  | 2.0767  | 0.4085  | 0.3803  |
| 1 | 0.0617  | 2.0737  | -1.2133 | 0.3854  |
| 1 | 0.3775  | -0.2382 | -1.4047 | 0.2355  |
| 1 | 0.8509  | -1.5775 | 0.7086  | 0.1829  |
| 1 | 1.2185  | -0.0242 | 1.5231  | 0.1812  |
| 9 | 2.4682  | -0.5775 | 0.0317  | -0.4156 |
| 1 | -1.2698 | -1.6357 | -1.1358 | 0.5406  |

| <b>4F<sub>c<sub>ag</sub></sub></b> -423.1401263 |         |         |         |         |
|-------------------------------------------------|---------|---------|---------|---------|
|                                                 | x       | y       | z       | NBO     |
| 1                                               | -0.0667 | 2.2422  | 0.6212  | 0.3824  |
| 7                                               | 0.2218  | 1.9917  | -0.3263 | -0.8642 |
| 6                                               | 0.2734  | 0.5439  | -0.4794 | -0.1663 |
| 6                                               | -0.9698 | -0.1797 | 0.0711  | 0.8065  |
| 8                                               | -1.5017 | 0.1391  | 1.1123  | -0.6548 |
| 6                                               | 1.5172  | 0.0488  | 0.2609  | 0.0908  |
| 1                                               | -0.4619 | 2.3936  | -0.9688 | 0.3899  |
| 8                                               | -1.4594 | -1.2056 | -0.6359 | -0.7001 |
| 1                                               | -0.9593 | -1.3615 | -1.4766 | 0.5405  |
| 1                                               | 0.3838  | 0.3078  | -1.5454 | 0.2290  |
| 9                                               | 1.6029  | -1.3602 | 0.1782  | -0.4189 |
| 1                                               | 1.4745  | 0.3081  | 1.3221  | 0.1786  |
| 1                                               | 2.4151  | 0.4638  | -0.1982 | 0.1865  |

### Alanine Zwitterion, CPCM

| zwAr <sub>aq</sub> -323.8780279 |         |         |         |         |
|---------------------------------|---------|---------|---------|---------|
|                                 | x       | y       | z       | NBO     |
| 8                               | 1.1154  | -1.1193 | 0.6358  | -0.8169 |
| 6                               | 0.9254  | -0.0728 | -0.0346 | 0.7654  |
| 6                               | -0.5505 | 0.2353  | -0.4155 | -0.1146 |
| 7                               | -1.3416 | -1.0436 | -0.2722 | -0.6999 |
| 6                               | -1.1483 | 1.3171  | 0.4801  | -0.5959 |
| 1                               | -1.1506 | -1.6850 | -1.0560 | 0.4571  |
| 1                               | -2.3600 | -0.8910 | -0.2370 | 0.4485  |
| 1                               | -1.0279 | -1.5278 | 0.5848  | 0.4600  |
| 1                               | -0.6091 | 0.5237  | -1.4685 | 0.2377  |
| 8                               | 1.7657  | 0.7721  | -0.4108 | -0.7984 |
| 1                               | -1.1187 | 1.0199  | 1.5326  | 0.2118  |
| 1                               | -2.1844 | 1.5329  | 0.2040  | 0.2128  |
| 1                               | -0.5670 | 2.2325  | 0.3654  | 0.2324  |

| zwAl <sub>aq</sub> -323.8778686 |         |         |         |         |
|---------------------------------|---------|---------|---------|---------|
|                                 | X       | y       | z       | NBO     |
| 1                               | 0.5100  | -1.9116 | 0.0923  | 0.4647  |
| 7                               | 1.2409  | -1.1808 | 0.0311  | -0.7035 |
| 6                               | 0.5774  | 0.1287  | 0.3899  | -0.1188 |
| 6                               | -0.9351 | 0.0032  | 0.0333  | 0.7692  |
| 6                               | 1.2970  | 1.2993  | -0.2639 | -0.5973 |
| 8                               | -1.3356 | -1.1561 | -0.2524 | -0.8183 |
| 8                               | -1.6017 | 1.0553  | 0.1045  | -0.7928 |
| 1                               | 0.6424  | 0.2008  | 1.4823  | 0.2417  |
| 1                               | 2.0304  | -1.4128 | 0.6499  | 0.4530  |
| 1                               | 1.5862  | -1.1900 | -0.9400 | 0.4458  |
| 1                               | 1.2637  | 1.2229  | -1.3552 | 0.2090  |
| 1                               | 2.3420  | 1.3501  | 0.0536  | 0.2119  |
| 1                               | 0.8017  | 2.2251  | 0.0263  | 0.2353  |

### 3-Fluoroalanines, Zwitterions CPCM

| zwAFa <sub>aq</sub> -423.1443442 |         |         |         |         |
|----------------------------------|---------|---------|---------|---------|
|                                  | X       | y       | z       | NBO     |
| 8                                | 1.8155  | 0.5654  | -0.6125 | -0.8045 |
| 6                                | 1.1286  | -0.2664 | 0.0307  | 0.7741  |
| 6                                | -0.1859 | 0.3045  | 0.6620  | -0.1689 |
| 7                                | -0.4081 | 1.6844  | 0.1038  | -0.7081 |
| 6                                | -1.4020 | -0.5683 | 0.4640  | 0.0675  |
| 1                                | -0.7535 | 2.3541  | 0.8061  | 0.4581  |
| 8                                | 1.3651  | -1.4645 | 0.2700  | -0.7827 |
| 1                                | -0.0113 | 0.4137  | 1.7404  | 0.2673  |
| 1                                | 0.5181  | 1.9896  | -0.2556 | 0.4671  |
| 1                                | -1.0575 | 1.6865  | -0.6971 | 0.4515  |
| 1                                | -1.2041 | -1.5667 | 0.8523  | 0.2078  |
| 9                                | -1.6695 | -0.6833 | -0.9218 | -0.4180 |
| 1                                | -2.2986 | -0.1451 | 0.9240  | 0.1889  |

| zwAFbr <sub>aq</sub> -423.1441575 |         |         |         |         |
|-----------------------------------|---------|---------|---------|---------|
|                                   | X       | y       | z       | NBO     |
| 1                                 | 1.0567  | -1.7637 | 0.0385  | 0.2082  |
| 6                                 | 1.2000  | -0.7240 | 0.3268  | 0.0668  |
| 6                                 | 0.1752  | 0.1463  | -0.3604 | -0.1633 |
| 6                                 | -1.3009 | -0.2746 | -0.0462 | 0.7729  |
| 7                                 | 0.3453  | 1.5926  | 0.0173  | -0.7042 |
| 8                                 | -2.0883 | 0.6761  | 0.1748  | -0.8000 |
| 8                                 | -1.5326 | -1.4982 | -0.0838 | -0.7831 |
| 1                                 | 0.3109  | 0.0927  | -1.4479 | 0.2565  |
| 1                                 | 0.6179  | 1.7137  | 1.0055  | 0.4521  |
| 1                                 | 1.0409  | 2.0798  | -0.5659 | 0.4586  |
| 1                                 | -0.5852 | 2.0357  | -0.0907 | 0.4678  |
| 1                                 | 1.1669  | -0.6236 | 1.4161  | 0.1857  |
| 9                                 | 2.4996  | -0.3324 | -0.0806 | -0.4180 |

| zwAFb1 <sub>aq</sub> -423.1439166 |         |         |         |         |
|-----------------------------------|---------|---------|---------|---------|
|                                   | X       | y       | z       | NBO     |
| 9                                 | 2.4612  | -0.4511 | 0.0377  | -0.4156 |
| 6                                 | 1.1279  | -0.7110 | 0.4358  | 0.0662  |
| 6                                 | 0.1776  | 0.0930  | -0.4259 | -0.1599 |
| 6                                 | -1.3051 | -0.2196 | -0.0344 | 0.7666  |
| 7                                 | 0.4301  | 1.5639  | -0.2379 | -0.7016 |
| 8                                 | -1.9059 | 0.6926  | 0.5794  | -0.7994 |

|   |         |         |         |         |
|---|---------|---------|---------|---------|
| 8 | -1.7075 | -1.3536 | -0.3606 | -0.7846 |
| 1 | 0.3431  | -0.1358 | -1.4831 | 0.2534  |
| 1 | 0.0723  | 2.1011  | -1.0422 | 0.4619  |
| 1 | 1.4303  | 1.7933  | -0.1340 | 0.4540  |
| 1 | -0.0982 | 1.8863  | 0.5907  | 0.4643  |
| 1 | 0.9391  | -1.7752 | 0.2972  | 0.2064  |
| 1 | 1.0570  | -0.4443 | 1.4944  | 0.1884  |

| zwAFcl <sub>aq</sub> -423.1384438 |         |         |         |         |
|-----------------------------------|---------|---------|---------|---------|
|                                   | X       | y       | z       | NBO     |
| 1                                 | 1.2793  | -0.2081 | 1.4295  | 0.1921  |
| 6                                 | 1.4183  | 0.2898  | 0.4682  | 0.0758  |
| 6                                 | 0.1043  | 0.4504  | -0.2930 | -0.1623 |
| 6                                 | -0.9745 | -0.6458 | -0.0244 | 0.7695  |
| 7                                 | -0.5201 | 1.7876  | -0.0001 | -0.7031 |
| 8                                 | -2.1610 | -0.2295 | -0.0051 | -0.8094 |
| 8                                 | -0.5506 | -1.8088 | 0.1091  | -0.7804 |
| 1                                 | 0.3236  | 0.4445  | -1.3682 | 0.2606  |
| 1                                 | -0.4391 | 2.0586  | 0.9928  | 0.4524  |
| 1                                 | -0.1285 | 2.5509  | -0.5717 | 0.4585  |
| 1                                 | -1.5330 | 1.6751  | -0.1940 | 0.4697  |
| 1                                 | 1.9132  | 1.2554  | 0.6106  | 0.1831  |
| 9                                 | 2.2921  | -0.5056 | -0.2929 | -0.4066 |

| zwAFcr <sub>aq</sub> -423.1381092 |         |         |         |         |
|-----------------------------------|---------|---------|---------|---------|
|                                   | X       | y       | z       | NBO     |
| 8                                 | -1.7149 | -0.2101 | 0.8661  | -0.8112 |
| 6                                 | -0.9199 | -0.6052 | -0.0237 | 0.7612  |
| 6                                 | 0.1294  | 0.4580  | -0.4777 | -0.1498 |
| 7                                 | -0.4923 | 1.8137  | -0.2871 | -0.7026 |
| 6                                 | 1.4033  | 0.4077  | 0.3699  | 0.0769  |
| 1                                 | -1.1551 | 2.0177  | -1.0514 | 0.4646  |
| 1                                 | 0.1887  | 2.5896  | -0.2583 | 0.4546  |
| 1                                 | -1.0427 | 1.7904  | 0.5902  | 0.4656  |
| 1                                 | 0.3772  | 0.3458  | -1.5367 | 0.2478  |
| 8                                 | -0.8437 | -1.7238 | -0.5669 | -0.7792 |
| 1                                 | 1.1767  | 0.4534  | 1.4393  | 0.1864  |
| 1                                 | 2.0869  | 1.2180  | 0.0969  | 0.1848  |
| 9                                 | 2.0673  | -0.8003 | 0.1250  | -0.3992 |



### Alanines, protonated Gasphase

| <b>p1</b> -324.2115677 |         |         |         |         |
|------------------------|---------|---------|---------|---------|
|                        | x       | y       | z       | NBO     |
| 1                      | 0.6805  | -1.8029 | -0.1268 | 0.4656  |
| 7                      | 1.3933  | -1.0782 | 0.1007  | -0.6964 |
| 6                      | 0.6134  | 0.1977  | 0.4028  | -0.1040 |
| 6                      | -0.8358 | -0.1526 | 0.0291  | 0.7981  |
| 8                      | -1.1364 | -1.2569 | -0.3572 | -0.5838 |
| 6                      | 1.1894  | 1.4012  | -0.3368 | -0.6040 |
| 1                      | 1.9666  | -1.3909 | 0.8870  | 0.4414  |
| 8                      | -1.6478 | 0.8722  | 0.2020  | -0.6387 |
| 1                      | -2.5610 | 0.6218  | -0.0224 | 0.5162  |
| 1                      | 0.6562  | 0.3497  | 1.4835  | 0.2499  |
| 1                      | 0.5997  | 2.2845  | -0.0914 | 0.2623  |
| 1                      | 1.1519  | 1.2610  | -1.4207 | 0.2247  |
| 1                      | 2.2205  | 1.5894  | -0.0305 | 0.2308  |
| 1                      | 2.0036  | -0.9651 | -0.7134 | 0.4378  |

| <b>p3</b> -324.2055391 |         |         |         |         |
|------------------------|---------|---------|---------|---------|
|                        | x       | y       | z       | NBO     |
| 8                      | 1.3816  | 1.0417  | -0.1753 | -0.7164 |
| 6                      | 0.8630  | -0.1833 | 0.0676  | 0.7806  |
| 6                      | -0.6341 | -0.0932 | 0.3963  | -0.1015 |
| 7                      | -1.1687 | 1.2846  | -0.0028 | -0.6812 |
| 6                      | -1.4559 | -1.1978 | -0.2523 | -0.6071 |
| 1                      | -1.2238 | 1.3749  | -1.0226 | 0.4399  |
| 1                      | -0.5444 | 2.0280  | 0.3297  | 0.4579  |
| 1                      | -2.1078 | 1.4390  | 0.3757  | 0.4401  |
| 1                      | -0.7217 | -0.1306 | 1.4859  | 0.2496  |
| 8                      | 1.4623  | -1.2119 | 0.0678  | -0.5064 |
| 1                      | -1.0390 | -2.1586 | 0.0502  | 0.2706  |
| 1                      | -1.4121 | -1.1460 | -1.3435 | 0.2244  |
| 1                      | -2.4976 | -1.1609 | 0.0733  | 0.2266  |
| 1                      | 2.3376  | 0.9701  | -0.3397 | 0.5229  |

| <b>p4</b> -324,1972222 |         |         |         |         |
|------------------------|---------|---------|---------|---------|
|                        | x       | y       | z       | NBO     |
| 1                      | 0.7971  | -1.6452 | -0.3316 | 0.4676  |
| 7                      | 1.4111  | -1.0138 | 0.2335  | -0.6994 |
| 6                      | 0.5883  | 0.2526  | 0.4208  | -0.1189 |
| 6                      | -0.8415 | -0.1812 | 0.0096  | 0.7942  |
| 8                      | -1.0042 | -1.2474 | -0.5262 | -0.5552 |

|   |         |         |         |         |
|---|---------|---------|---------|---------|
| 6 | 1.1358  | 1.3888  | -0.4452 | -0.6055 |
| 1 | 1.6189  | -1.4849 | 1.1175  | 0.4423  |
| 8 | -1.8369 | 0.6565  | 0.2403  | -0.6099 |
| 1 | -1.5795 | 1.4661  | 0.7034  | 0.4939  |
| 1 | 0.6227  | 0.5121  | 1.4808  | 0.2386  |
| 1 | 0.5349  | 2.2898  | -0.3105 | 0.2440  |
| 1 | 1.1091  | 1.1285  | -1.5063 | 0.2352  |
| 1 | 2.1585  | 1.6403  | -0.1558 | 0.2345  |
| 1 | 2.2929  | -0.8447 | -0.2563 | 0.4386  |

### Alanine Protonated-CPCM

| <b>p1<sub>aq</sub></b> -324.329114 |         |         |         |         |
|------------------------------------|---------|---------|---------|---------|
|                                    | x       | y       | z       | NBO     |
| 1                                  | -1.1063 | -1.8319 | -0.6841 | 0.4704  |
| 7                                  | -1.4570 | -1.0146 | -0.1573 | -0.6949 |
| 6                                  | -0.6003 | 0.1975  | -0.3918 | -0.1136 |
| 6                                  | 0.8323  | -0.1769 | -0.0239 | 0.8131  |
| 8                                  | 1.1382  | -1.2510 | 0.4433  | -0.6352 |
| 6                                  | -1.1315 | 1.3936  | 0.3968  | -0.5963 |
| 1                                  | -2.4299 | -0.8442 | -0.4616 | 0.4660  |
| 8                                  | 1.6659  | 0.8190  | -0.2842 | -0.6857 |
| 1                                  | 2.5955  | 0.5552  | -0.0347 | 0.5527  |
| 1                                  | -0.6373 | 0.3969  | -1.4709 | 0.2724  |
| 1                                  | -0.5208 | 2.2686  | 0.1753  | 0.2415  |
| 1                                  | -1.0971 | 1.2061  | 1.4735  | 0.2205  |
| 1                                  | -2.1617 | 1.6105  | 0.1052  | 0.2261  |
| 1                                  | -1.4787 | -1.2877 | 0.8399  | 0.4629  |

| <b>p3<sub>aq</sub></b> -324.3271564 |         |         |         |         |
|-------------------------------------|---------|---------|---------|---------|
|                                     | x       | y       | z       | NBO     |
| 8                                   | 1.2760  | -1.0803 | 0.3450  | -0.7028 |
| 6                                   | 0.8694  | 0.1108  | -0.0847 | 0.8156  |
| 6                                   | -0.6263 | 0.1492  | -0.3929 | -0.1134 |
| 7                                   | -1.2673 | -1.1889 | -0.1248 | -0.6977 |
| 6                                   | -1.3438 | 1.2505  | 0.3836  | -0.5953 |
| 1                                   | -1.2194 | -1.4564 | 0.8729  | 0.4632  |
| 1                                   | -0.8151 | -1.9448 | -0.6648 | 0.4706  |
| 1                                   | -2.2646 | -1.1756 | -0.3969 | 0.4657  |
| 1                                   | -0.7224 | 0.3157  | -1.4743 | 0.2730  |
| 8                                   | 1.5727  | 1.0802  | -0.2353 | -0.6249 |

|   |         |         |        |        |
|---|---------|---------|--------|--------|
| 1 | -0.8742 | 2.2073  | 0.1566 | 0.2420 |
| 1 | -1.2846 | 1.0789  | 1.4620 | 0.2200 |
| 1 | -2.3936 | 1.3014  | 0.0864 | 0.2254 |
| 1 | 2.2596  | -1.0667 | 0.5183 | 0.5587 |

| <b>p4<sub>ag</sub></b> -324.3231288 |         |         |         |         |
|-------------------------------------|---------|---------|---------|---------|
|                                     | x       | y       | z       | NBO     |
| 1                                   | -1.4151 | -1.4127 | 0.5802  | 0.4661  |
| 7                                   | -1.4515 | -0.9581 | -0.3482 | -0.6957 |
| 6                                   | -0.5701 | 0.2575  | -0.3994 | -0.1220 |
| 6                                   | 0.8351  | -0.1874 | 0.0119  | 0.8085  |
| 8                                   | 1.0136  | -1.1652 | 0.7003  | -0.6265 |
| 6                                   | -1.1057 | 1.3377  | 0.5440  | -0.5968 |
| 1                                   | -1.1599 | -1.6663 | -1.0436 | 0.4704  |
| 8                                   | 1.8479  | 0.5826  | -0.3661 | -0.6816 |
| 1                                   | 1.6056  | 1.2794  | -1.0333 | 0.5507  |
| 1                                   | -0.5738 | 0.6042  | -1.4408 | 0.2683  |
| 1                                   | -0.4712 | 2.2238  | 0.4882  | 0.2380  |
| 1                                   | -1.1204 | 0.9827  | 1.5778  | 0.2239  |
| 1                                   | -2.1170 | 1.6266  | 0.2488  | 0.2302  |
| 1                                   | -2.4359 | -0.7173 | -0.5527 | 0.4664  |

### 3-Fluoroalanines, protonated, Gasphase

| <b>p1Fa</b> -423.4690334 |         |         |         |         |
|--------------------------|---------|---------|---------|---------|
|                          | x       | y       | z       | NBO     |
| 1                        | -1.3209 | 1.4463  | -0.6101 | 0.4525  |
| 7                        | -0.6831 | 1.5756  | 0.1867  | -0.6958 |
| 6                        | -0.2402 | 0.2226  | 0.7006  | -0.1456 |
| 6                        | 1.1151  | -0.0311 | 0.0115  | 0.7973  |
| 8                        | 1.6742  | 0.8437  | -0.5991 | -0.5704 |
| 6                        | -1.3206 | -0.8180 | 0.4137  | 0.0689  |
| 1                        | 0.1659  | 2.0513  | -0.1741 | 0.4680  |
| 8                        | 1.5411  | -1.2617 | 0.2211  | -0.6431 |
| 1                        | 2.4099  | -1.3984 | -0.1959 | 0.5197  |
| 1                        | -0.0655 | 0.2969  | 1.7770  | 0.2639  |
| 1                        | -0.9311 | -1.8233 | 0.5698  | 0.2248  |
| 9                        | -1.6856 | -0.6658 | -0.9249 | -0.3769 |
| 1                        | -2.2109 | -0.6591 | 1.0258  | 0.1943  |
| 1                        | -1.1431 | 2.1529  | 0.8938  | 0.4423  |

| <b>p1Fb</b> -423.4681597 |         |         |         |         |
|--------------------------|---------|---------|---------|---------|
|                          | x       | y       | z       | NBO     |
| 9                        | -2.4348 | -0.4622 | -0.0972 | -0.3728 |
| 6                        | -1.1268 | -0.8573 | -0.3719 | 0.0729  |
| 6                        | -0.2091 | 0.0520  | 0.4562  | -0.1417 |
| 7                        | -0.6301 | 1.4904  | 0.2468  | -0.6901 |
| 6                        | 1.2553  | -0.0345 | 0.0087  | 0.7871  |
| 8                        | 1.7825  | -1.2023 | 0.3306  | -0.6410 |
| 1                        | -0.0563 | 1.8884  | -0.5153 | 0.4622  |
| 1                        | -0.4615 | 2.0626  | 1.0790  | 0.4462  |
| 1                        | -1.6318 | 1.5386  | 0.0220  | 0.4542  |
| 1                        | -0.3136 | -0.1792 | 1.5168  | 0.2581  |
| 8                        | 1.7827  | 0.8720  | -0.5823 | -0.5670 |
| 1                        | -0.9618 | -0.7460 | -1.4467 | 0.1925  |
| 1                        | -0.9927 | -1.8969 | -0.0747 | 0.2214  |
| 1                        | 2.7038  | -1.2588 | 0.0206  | 0.5182  |

| <b>p1Fc</b> -423.4575808 |         |         |         |         |
|--------------------------|---------|---------|---------|---------|
|                          | x       | y       | z       | NBO     |
| 7                        | 0.5170  | 1.8503  | 0.2320  | -0.6963 |
| 6                        | -0.1560 | 0.5087  | 0.4458  | -0.1396 |
| 6                        | 0.9058  | -0.5174 | 0.0113  | 0.7920  |
| 8                        | 1.8729  | -0.1612 | -0.6209 | -0.5844 |

|   |         |         |         |         |
|---|---------|---------|---------|---------|
| 8 | 0.6067  | -1.7368 | 0.3948  | -0.6188 |
| 6 | -1.4504 | 0.4363  | -0.3959 | 0.0848  |
| 1 | -0.0995 | 2.5554  | -0.1819 | 0.4386  |
| 1 | 0.8925  | 2.2351  | 1.1033  | 0.4473  |
| 1 | 1.3213  | 1.6596  | -0.4049 | 0.4688  |
| 1 | -0.4047 | 0.3936  | 1.5010  | 0.2591  |
| 1 | 1.2734  | -2.3703 | 0.0747  | 0.5164  |
| 1 | -1.2312 | 0.4380  | -1.4686 | 0.1893  |
| 9 | -2.1004 | -0.7252 | -0.0733 | -0.3411 |
| 1 | -2.1008 | 1.2816  | -0.1467 | 0.1837  |

| <b>p3Fa</b> -423.4634874 |         |         |         |         |
|--------------------------|---------|---------|---------|---------|
|                          | x       | y       | z       | NBO     |
| 8                        | 1.4181  | -1.4396 | 0.1707  | -0.5041 |
| 6                        | 1.0860  | -0.3000 | 0.0894  | 0.7849  |
| 6                        | -0.2302 | 0.2146  | 0.7008  | -0.1453 |
| 7                        | -0.5606 | 1.5996  | 0.1651  | -0.6886 |
| 6                        | -1.4040 | -0.7152 | 0.4047  | 0.0677  |
| 8                        | 1.7807  | 0.7055  | -0.4768 | -0.7102 |
| 1                        | -1.0030 | 1.4995  | -0.7590 | 0.4555  |
| 1                        | 0.2970  | 2.1514  | 0.0452  | 0.4629  |
| 1                        | -1.2085 | 2.1072  | 0.7748  | 0.4418  |
| 1                        | -0.0753 | 0.3029  | 1.7793  | 0.2639  |
| 1                        | -1.1045 | -1.7512 | 0.5606  | 0.2324  |
| 9                        | -1.7362 | -0.5256 | -0.9396 | -0.3794 |
| 1                        | -2.2835 | -0.4756 | 1.0060  | 0.1921  |
| 1                        | 2.6265  | 0.3761  | -0.8272 | 0.5266  |

| <b>p3Fb</b> -423.4626721 |         |         |         |         |
|--------------------------|---------|---------|---------|---------|
|                          | x       | y       | z       | NBO     |
| 9                        | -2.4777 | -0.3055 | -0.0390 | -0.3768 |
| 6                        | -1.2129 | -0.8214 | -0.3212 | 0.0731  |
| 6                        | -0.2101 | 0.0689  | 0.4163  | -0.1415 |
| 6                        | 1.2375  | -0.2986 | 0.0838  | 0.7773  |
| 7                        | -0.5238 | 1.5208  | 0.0906  | -0.6823 |
| 8                        | 1.9375  | 0.7872  | -0.2944 | -0.7033 |
| 8                        | 1.6382  | -1.4175 | 0.1653  | -0.5039 |
| 1                        | -0.3576 | -0.0353 | 1.4940  | 0.2600  |
| 1                        | -0.2802 | 1.7516  | -0.8785 | 0.4471  |
| 1                        | 0.0020  | 2.1637  | 0.6901  | 0.4516  |
| 1                        | -1.5312 | 1.6812  | 0.2213  | 0.4563  |
| 1                        | -1.0735 | -0.8031 | -1.4053 | 0.1904  |

|   |         |         |         |        |
|---|---------|---------|---------|--------|
| 1 | -1.1433 | -1.8443 | 0.0462  | 0.2282 |
| 1 | 2.8581  | 0.5400  | -0.4912 | 0.5238 |

| <b>p3Fc -423.450235</b> |         |         |         |         |
|-------------------------|---------|---------|---------|---------|
|                         | x       | y       | z       | NBO     |
| 7                       | -0.2571 | 1.8846  | -0.3008 | -0.6833 |
| 6                       | 0.2388  | 0.4573  | -0.4950 | -0.1340 |
| 6                       | -0.8863 | -0.5228 | -0.1354 | 0.7700  |
| 8                       | -1.0574 | -1.5621 | -0.6847 | -0.4785 |
| 8                       | -1.6042 | -0.0248 | 0.8997  | -0.7223 |
| 6                       | 1.4911  | 0.2475  | 0.3831  | 0.0822  |
| 1                       | 0.5055  | 2.5683  | -0.3603 | 0.4413  |
| 1                       | -0.9530 | 2.1359  | -1.0107 | 0.4497  |
| 1                       | -0.7163 | 1.9704  | 0.6156  | 0.4606  |
| 1                       | 0.4930  | 0.3303  | -1.5471 | 0.2583  |
| 1                       | -2.2901 | -0.6592 | 1.1703  | 0.5248  |
| 1                       | 1.2573  | 0.3631  | 1.4462  | 0.1881  |
| 9                       | 1.9397  | -1.0278 | 0.1624  | -0.3398 |
| 1                       | 2.2779  | 0.9530  | 0.0943  | 0.1830  |

| <b>p4Fa -423.4521168</b> |         |         |         |         |
|--------------------------|---------|---------|---------|---------|
|                          | x       | y       | z       | NBO     |
| 1                        | -1.3260 | 1.5013  | -0.5342 | 0.4510  |
| 7                        | -0.6391 | 1.5794  | 0.2265  | -0.7003 |
| 6                        | -0.2331 | 0.2034  | 0.7057  | -0.1605 |
| 6                        | 1.1291  | -0.0516 | -0.0075 | 0.7965  |
| 8                        | 1.6392  | 0.8486  | -0.6187 | -0.5446 |
| 6                        | -1.3535 | -0.7900 | 0.4013  | 0.0669  |
| 1                        | 0.2284  | 1.9900  | -0.1854 | 0.4716  |
| 8                        | 1.6946  | -1.2373 | 0.1209  | -0.6061 |
| 1                        | 1.1944  | -1.8748 | 0.6484  | 0.4925  |
| 1                        | -0.0563 | 0.2514  | 1.7840  | 0.2588  |
| 1                        | -1.0424 | -1.8219 | 0.5767  | 0.1991  |
| 9                        | -1.6878 | -0.6399 | -0.9391 | -0.3684 |
| 1                        | -2.2443 | -0.5863 | 1.0005  | 0.2009  |
| 1                        | -1.0147 | 2.1822  | 0.9616  | 0.4426  |

| <b>p4Fb -423.45273</b> |         |         |         |         |
|------------------------|---------|---------|---------|---------|
|                        | x       | y       | z       | NBO     |
| 9                      | -2.4320 | -0.4690 | -0.1002 | -0.3692 |
| 6                      | -1.1263 | -0.8289 | -0.4187 | 0.0695  |

|   |         |         |         |         |
|---|---------|---------|---------|---------|
| 6 | -0.2028 | 0.0198  | 0.4675  | -0.1549 |
| 7 | -0.6162 | 1.4676  | 0.3294  | -0.6932 |
| 6 | 1.2677  | -0.0345 | -0.0146 | 0.7831  |
| 8 | 1.9780  | -1.1131 | 0.2732  | -0.6099 |
| 1 | -0.0365 | 1.8740  | -0.4287 | 0.4667  |
| 1 | -0.4265 | 2.0063  | 1.1794  | 0.4462  |
| 1 | -1.6187 | 1.5419  | 0.1176  | 0.4537  |
| 1 | -0.3203 | -0.2612 | 1.5156  | 0.2447  |
| 8 | 1.6957  | 0.8766  | -0.6690 | -0.5412 |
| 1 | -0.9678 | -0.6302 | -1.4818 | 0.1999  |
| 1 | -0.9935 | -1.8923 | -0.2158 | 0.2096  |
| 1 | 1.5437  | -1.7373 | 0.8718  | 0.4951  |

| <b>p4Fc -423.4508212</b> |         |         |         |         |
|--------------------------|---------|---------|---------|---------|
|                          | x       | y       | z       | NBO     |
| 7                        | 0.9531  | 1.6956  | 0.0757  | -0.7019 |
| 6                        | -0.0162 | 0.5792  | 0.3859  | -0.1583 |
| 6                        | 0.7750  | -0.7133 | 0.0234  | 0.7963  |
| 8                        | 1.9418  | -0.6011 | -0.2636 | -0.5577 |
| 8                        | 0.1469  | -1.8632 | 0.0736  | -0.6060 |
| 6                        | -1.3517 | 0.7520  | -0.3520 | 0.0698  |
| 1                        | 1.0615  | 2.3640  | 0.8420  | 0.4463  |
| 1                        | 1.8585  | 1.1841  | -0.0969 | 0.4731  |
| 1                        | 0.7175  | 2.2161  | -0.7749 | 0.4380  |
| 1                        | -0.1994 | 0.5836  | 1.4632  | 0.2565  |
| 1                        | -0.8035 | -1.7781 | 0.2620  | 0.5120  |
| 1                        | -1.2364 | 0.6994  | -1.4385 | 0.1952  |
| 9                        | -2.1521 | -0.3124 | 0.0507  | -0.3642 |
| 1                        | -1.8535 | 1.6793  | -0.0677 | 0.2008  |

### 3-Fluoroalanine, protonated CPCM

| <b>p1Fa<sub>aq</sub></b> -423.591693 |         |         |         |         |
|--------------------------------------|---------|---------|---------|---------|
|                                      | x       | y       | z       | NBO     |
| 1                                    | 0.9467  | 1.6096  | 0.8662  | 0.4680  |
| 7                                    | 0.7399  | 1.6391  | -0.1473 | -0.6976 |
| 6                                    | 0.2729  | 0.3128  | -0.6643 | -0.1591 |
| 6                                    | -1.0796 | 0.0034  | -0.0181 | 0.8146  |
| 8                                    | -1.6328 | 0.7680  | 0.7365  | -0.6242 |
| 6                                    | 1.3213  | -0.7602 | -0.4280 | 0.0683  |
| 1                                    | 0.0178  | 2.3665  | -0.2854 | 0.4753  |
| 8                                    | -1.5320 | -1.1743 | -0.4127 | -0.6837 |
| 1                                    | -2.4190 | -1.3581 | 0.0088  | 0.5569  |
| 1                                    | 0.1240  | 0.4178  | -1.7502 | 0.2971  |
| 1                                    | 0.9872  | -1.7083 | -0.8504 | 0.2149  |
| 9                                    | 1.5015  | -0.9295 | 0.9566  | -0.4041 |
| 1                                    | 2.2857  | -0.4719 | -0.8549 | 0.2022  |
| 1                                    | 1.5954  | 1.9498  | -0.6398 | 0.4715  |

| <b>p1Fb<sub>aq</sub></b> -423.5908547 |         |         |         |         |
|---------------------------------------|---------|---------|---------|---------|
|                                       | x       | y       | z       | NBO     |
| 9                                     | 2.4737  | -0.4828 | -0.0205 | -0.3999 |
| 6                                     | 1.1597  | -0.7712 | 0.3834  | 0.0697  |
| 6                                     | 0.2170  | 0.1502  | -0.3800 | -0.1542 |
| 7                                     | 0.5443  | 1.5836  | -0.0983 | -0.6973 |
| 6                                     | -1.2532 | -0.0855 | -0.0331 | 0.8134  |
| 8                                     | -1.5851 | -1.3513 | -0.2236 | -0.6827 |
| 1                                     | 0.4228  | 1.8240  | 0.9015  | 0.4679  |
| 1                                     | -0.0695 | 2.2169  | -0.6388 | 0.4752  |
| 1                                     | 1.5213  | 1.7965  | -0.3625 | 0.4715  |
| 1                                     | 0.3489  | -0.0011 | -1.4613 | 0.2865  |
| 8                                     | -1.9820 | 0.7979  | 0.3508  | -0.6197 |
| 1                                     | 1.1057  | -0.6114 | 1.4647  | 0.1973  |
| 1                                     | 0.9451  | -1.8113 | 0.1385  | 0.2145  |
| 1                                     | -2.5518 | -1.4874 | -0.0081 | 0.5579  |

| <b>p1Fc<sub>aq</sub></b> -423.5863661 |         |         |         |         |
|---------------------------------------|---------|---------|---------|---------|
|                                       | x       | y       | z       | NBO     |
| 7                                     | -0.3996 | 1.8865  | -0.2047 | -0.6963 |
| 6                                     | 0.1480  | 0.5054  | -0.3869 | -0.1506 |
| 6                                     | -0.9565 | -0.4839 | -0.0176 | 0.8097  |
| 8                                     | -1.9997 | -0.1355 | 0.4864  | -0.6284 |



|   |         |         |         |         |
|---|---------|---------|---------|---------|
| 8 | -0.6094 | -1.7240 | -0.3134 | -0.6769 |
| 6 | 1.4251  | 0.3506  | 0.4563  | 0.0772  |
| 1 | 0.2869  | 2.6055  | -0.4934 | 0.4720  |
| 1 | -1.2489 | 2.0232  | -0.7799 | 0.4769  |
| 1 | -0.6724 | 2.0754  | 0.7763  | 0.4699  |
| 1 | 0.4053  | 0.3935  | -1.4488 | 0.2847  |
| 1 | -1.3376 | -2.3515 | -0.0409 | 0.5540  |
| 1 | 1.2028  | 0.1854  | 1.5144  | 0.1969  |
| 9 | 2.1420  | -0.7478 | -0.0143 | -0.3861 |
| 1 | 2.0557  | 1.2373  | 0.3390  | 0.1971  |

| <b>p3Fa<sub>aq</sub></b> -423.58994 |         |         |         |         |
|-------------------------------------|---------|---------|---------|---------|
|                                     | x       | y       | z       | NBO     |
| 8                                   | -1.4533 | -1.3597 | -0.3991 | -0.6164 |
| 6                                   | -1.0609 | -0.2536 | -0.1236 | 0.8165  |
| 6                                   | 0.2593  | 0.2851  | -0.6831 | -0.1588 |
| 7                                   | 0.5626  | 1.6634  | -0.1669 | -0.7002 |
| 6                                   | 1.4161  | -0.6565 | -0.4000 | 0.0698  |
| 8                                   | -1.6786 | 0.6272  | 0.6517  | -0.6975 |
| 1                                   | 0.7130  | 1.6737  | 0.8567  | 0.4685  |
| 1                                   | -0.2086 | 2.3213  | -0.3695 | 0.4752  |
| 1                                   | 1.4150  | 2.0445  | -0.6148 | 0.4714  |
| 1                                   | 0.1416  | 0.3694  | -1.7744 | 0.2971  |
| 1                                   | 1.1873  | -1.6500 | -0.7871 | 0.2150  |
| 9                                   | 1.5977  | -0.7516 | 0.9918  | -0.4045 |
| 1                                   | 2.3480  | -0.2817 | -0.8313 | 0.2019  |
| 1                                   | -2.5450 | 0.2532  | 0.9818  | 0.5619  |

| <b>p3Fb<sub>aq</sub></b> -423.5889773 |         |         |         |         |
|---------------------------------------|---------|---------|---------|---------|
|                                       | x       | y       | z       | NBO     |
| 9                                     | 2.5173  | -0.3444 | -0.0378 | -0.3999 |
| 6                                     | 1.2304  | -0.7358 | 0.3639  | 0.0714  |
| 6                                     | 0.2199  | 0.1307  | -0.3753 | -0.1541 |
| 6                                     | -1.2112 | -0.3202 | -0.0805 | 0.8159  |
| 7                                     | 0.4331  | 1.5795  | -0.0452 | -0.6993 |
| 8                                     | -2.0013 | 0.6967  | 0.2353  | -0.6957 |
| 8                                     | -1.5355 | -1.4794 | -0.1566 | -0.6140 |
| 1                                     | 0.3780  | 0.0329  | -1.4597 | 0.2872  |
| 1                                     | 0.2760  | 1.7839  | 0.9575  | 0.4678  |
| 1                                     | -0.2045 | 2.1871  | -0.5865 | 0.4754  |
| 1                                     | 1.3998  | 1.8667  | -0.2778 | 0.4711  |
| 1                                     | 1.1698  | -0.6063 | 1.4488  | 0.1971  |

|   |         |         |        |        |
|---|---------|---------|--------|--------|
| 1 | 1.0857  | -1.7816 | 0.0940 | 0.2149 |
| 1 | -2.9332 | 0.3747  | 0.4027 | 0.5624 |

| <b>p3Fc<sub>aq</sub></b> -423.5843673 |         |         |         |         |
|---------------------------------------|---------|---------|---------|---------|
|                                       | x       | y       | z       | NBO     |
| 7                                     | -0.3242 | 1.8721  | -0.2828 | -0.6991 |
| 6                                     | 0.2027  | 0.4765  | -0.4521 | -0.1460 |
| 6                                     | -0.8695 | -0.5614 | -0.1210 | 0.8083  |
| 8                                     | -0.8406 | -1.6805 | -0.5672 | -0.6064 |
| 8                                     | -1.7752 | -0.0782 | 0.7237  | -0.7031 |
| 6                                     | 1.4486  | 0.3154  | 0.4346  | 0.0781  |
| 1                                     | 0.3849  | 2.5746  | -0.5612 | 0.4727  |
| 1                                     | -1.1540 | 2.0308  | -0.8813 | 0.4771  |
| 1                                     | -0.6089 | 2.0770  | 0.6911  | 0.4706  |
| 1                                     | 0.4845  | 0.3610  | -1.5052 | 0.2795  |
| 1                                     | -2.4536 | -0.7780 | 0.9452  | 0.5611  |
| 1                                     | 1.1945  | 0.3108  | 1.4988  | 0.1960  |
| 9                                     | 2.0549  | -0.9010 | 0.1279  | -0.3877 |
| 1                                     | 2.1636  | 1.1155  | 0.2201  | 0.1987  |

| <b>p4Fa<sub>aq</sub></b> -423.5848344 |         |         |         |         |
|---------------------------------------|---------|---------|---------|---------|
|                                       | x       | y       | z       | NBO     |
| 1                                     | 0.9905  | 1.6113  | 0.7197  | 0.4708  |
| 7                                     | 0.8172  | 1.5690  | -0.2995 | -0.6984 |
| 6                                     | 0.2450  | 0.2452  | -0.7069 | -0.1669 |
| 6                                     | -1.0752 | 0.0569  | 0.0518  | 0.8091  |
| 8                                     | -1.3413 | 0.7239  | 1.0217  | -0.6141 |
| 6                                     | 1.2454  | -0.8664 | -0.4159 | 0.0673  |
| 1                                     | 0.1707  | 2.3439  | -0.5284 | 0.4753  |
| 8                                     | -1.8866 | -0.8990 | -0.3793 | -0.6789 |
| 1                                     | -1.6484 | -1.2820 | -1.2661 | 0.5524  |
| 1                                     | 0.0642  | 0.2803  | -1.7922 | 0.2942  |
| 1                                     | 0.8508  | -1.8295 | -0.7481 | 0.2110  |
| 9                                     | 1.4746  | -0.9345 | 0.9659  | -0.3992 |
| 1                                     | 2.2023  | -0.6670 | -0.9064 | 0.2058  |
| 1                                     | 1.7100  | 1.7576  | -0.7888 | 0.4717  |

| <b>p4Fbaq</b> -423.5840921 |        |         |        |         |
|----------------------------|--------|---------|--------|---------|
|                            | x      | y       | z      | NBO     |
| 9                          | 2.4459 | -0.5583 | 0.0549 | -0.3952 |
| 6                          | 1.1298 | -0.7155 | 0.5108 | 0.0690  |

|   |         |         |         |         |
|---|---------|---------|---------|---------|
| 6 | 0.2091  | 0.0737  | -0.4171 | -0.1608 |
| 7 | 0.5712  | 1.5266  | -0.3719 | -0.6985 |
| 6 | -1.2544 | -0.0630 | 0.0268  | 0.8054  |
| 8 | -1.9088 | -1.1416 | -0.3743 | -0.6731 |
| 1 | 0.3561  | 1.9432  | 0.5514  | 0.4705  |
| 1 | 0.0444  | 2.0655  | -1.0817 | 0.4751  |
| 1 | 1.5778  | 1.6663  | -0.5669 | 0.4715  |
| 1 | 0.3412  | -0.2624 | -1.4548 | 0.2812  |
| 8 | -1.7638 | 0.7616  | 0.7463  | -0.6114 |
| 1 | 1.0874  | -0.3441 | 1.5391  | 0.2009  |
| 1 | 0.8804  | -1.7783 | 0.4781  | 0.2113  |
| 1 | -1.4250 | -1.6834 | -1.0556 | 0.5542  |

| <b>p4Fc<sub>aq</sub></b> -423.581608 |         |         |         |         |
|--------------------------------------|---------|---------|---------|---------|
|                                      | x       | y       | z       | NBO     |
| 7                                    | -0.4140 | 1.8904  | -0.2967 | -0.6975 |
| 6                                    | 0.1491  | 0.5142  | -0.4608 | -0.1567 |
| 6                                    | -0.9140 | -0.4823 | 0.0204  | 0.8046  |
| 8                                    | -1.7410 | -0.1580 | 0.8399  | -0.6199 |
| 8                                    | -0.8592 | -1.7120 | -0.4644 | -0.6722 |
| 6                                    | 1.4364  | 0.4043  | 0.3717  | 0.0756  |
| 1                                    | 0.2831  | 2.6213  | -0.5270 | 0.4730  |
| 1                                    | -1.2230 | 2.0350  | -0.9269 | 0.4779  |
| 1                                    | -0.7512 | 2.0524  | 0.6694  | 0.4723  |
| 1                                    | 0.3768  | 0.3743  | -1.5260 | 0.2781  |
| 1                                    | -0.1884 | -1.8367 | -1.1893 | 0.5541  |
| 1                                    | 1.2350  | 0.5213  | 1.4408  | 0.1977  |
| 9                                    | 1.9744  | -0.8668 | 0.1675  | -0.3887 |
| 1                                    | 2.1688  | 1.1441  | 0.0365  | 0.2019  |

### Alanine Anions Gasphase

| <b>a1r</b> -323.3030773 |         |         |         |         |
|-------------------------|---------|---------|---------|---------|
|                         | X       | y       | z       | NBO     |
| 1                       | -0.9743 | -1.6201 | 0.4370  | 0.3668  |
| 7                       | -1.4181 | -1.0948 | -0.3209 | -0.8814 |
| 6                       | -0.6185 | 0.1492  | -0.4087 | -0.1215 |
| 6                       | 0.8963  | -0.0540 | -0.0325 | 0.7428  |
| 8                       | 1.1444  | -1.0541 | 0.6899  | -0.8038 |
| 6                       | -1.2289 | 1.2165  | 0.5078  | -0.5722 |
| 1                       | -1.2122 | -1.6519 | -1.1470 | 0.3307  |
| 8                       | 1.6820  | 0.8192  | -0.4689 | -0.7889 |
| 1                       | -0.6567 | 0.5156  | -1.4401 | 0.1649  |
| 1                       | -0.6505 | 2.1422  | 0.4476  | 0.2003  |
| 1                       | -1.2139 | 0.8699  | 1.5473  | 0.1865  |
| 1                       | -2.2709 | 1.4173  | 0.2338  | 0.1758  |

| <b>all</b> -323.3029148 |         |         |         |         |
|-------------------------|---------|---------|---------|---------|
|                         | x       | y       | z       | NBO     |
| 1                       | -0.5124 | 1.9515  | 0.1210  | 0.3744  |
| 7                       | -1.2839 | 1.2805  | 0.1424  | -0.8793 |
| 6                       | -0.6235 | -0.0186 | 0.3989  | -0.1236 |
| 6                       | 0.9112  | -0.0284 | 0.0265  | 0.7467  |
| 8                       | 1.4041  | 1.0872  | -0.2807 | -0.8006 |
| 6                       | -1.3846 | -1.1577 | -0.2767 | -0.5807 |
| 8                       | 1.4789  | -1.1416 | 0.1171  | -0.7916 |
| 1                       | -0.6528 | -0.1947 | 1.4836  | 0.1667  |
| 1                       | -0.8918 | -2.1068 | -0.0634 | 0.2199  |
| 1                       | -1.3885 | -1.0222 | -1.3666 | 0.1752  |
| 1                       | -2.4268 | -1.1995 | 0.0640  | 0.1721  |
| 1                       | -1.6232 | 1.2719  | -0.8182 | 0.3207  |

### Alanine Anions CPCM

| <b>al<sub>aq</sub></b> -323.410603 |         |         |         |         |
|------------------------------------|---------|---------|---------|---------|
|                                    | X       | y       | z       | NBO     |
| 1                                  | -1.3352 | -1.5196 | 0.5058  | 0.3649  |
| 7                                  | -1.4351 | -1.0653 | -0.4037 | -0.8852 |
| 6                                  | -0.6098 | 0.1516  | -0.4125 | -0.1215 |
| 6                                  | 0.8820  | -0.0586 | -0.0244 | 0.7592  |
| 8                                  | 1.1541  | -0.9779 | 0.7945  | -0.8463 |
| 6                                  | -1.2296 | 1.1960  | 0.5258  | -0.5751 |
| 1                                  | -1.0599 | -1.7322 | -1.0802 | 0.3674  |
| 8                                  | 1.7170  | 0.7357  | -0.5435 | -0.8521 |
| 1                                  | -0.6207 | 0.5504  | -1.4328 | 0.1924  |
| 1                                  | -0.6519 | 2.1235  | 0.5180  | 0.2034  |
| 1                                  | -1.2559 | 0.8185  | 1.5536  | 0.1935  |
| 1                                  | -2.2552 | 1.4196  | 0.2202  | 0.1994  |

### Fluoroalanines, Anions, Gasphase

| <b>alFal</b> -422.5756392 |         |         |         |         |
|---------------------------|---------|---------|---------|---------|
|                           | X       | y       | z       | NBO     |
| 6                         | -1.3550 | -0.5710 | 0.4572  | 0.0831  |
| 6                         | -0.1616 | 0.3375  | 0.6416  | -0.1673 |
| 6                         | 1.1617  | -0.2403 | -0.0125 | 0.7530  |
| 8                         | 1.8797  | 0.6034  | -0.5981 | -0.7877 |
| 7                         | -0.4830 | 1.7235  | 0.2623  | -0.8794 |
| 1                         | 0.4161  | 2.1155  | -0.0234 | 0.3746  |
| 1                         | -1.0147 | 1.6819  | -0.6046 | 0.3392  |
| 1                         | 0.0415  | 0.3105  | 1.7235  | 0.1825  |
| 8                         | 1.3604  | -1.4587 | 0.1917  | -0.7872 |
| 1                         | -1.0620 | -1.6027 | 0.6472  | 0.1878  |
| 9                         | -1.8434 | -0.5129 | -0.8810 | -0.4334 |
| 1                         | -2.2012 | -0.2678 | 1.0835  | 0.1348  |

| <b>alFar</b> -422.5787216 |         |         |         |         |
|---------------------------|---------|---------|---------|---------|
|                           | X       | y       | z       | NBO     |
| 9                         | 2.4839  | -0.4070 | 0.0880  | -0.4462 |
| 6                         | 1.1016  | -0.6483 | 0.4015  | 0.0800  |
| 6                         | 0.1860  | 0.1826  | -0.4693 | -0.1648 |
| 6                         | -1.2955 | -0.1964 | -0.0369 | 0.7576  |
| 7                         | 0.4210  | 1.6252  | -0.3673 | -0.8791 |
| 1                         | 0.9931  | -0.3865 | 1.4583  | 0.1471  |

|   |         |         |         |         |
|---|---------|---------|---------|---------|
| 1 | 0.9264  | -1.7124 | 0.2469  | 0.1750  |
| 1 | 0.3101  | -0.1504 | -1.5062 | 0.1778  |
| 8 | -1.9256 | 0.7006  | 0.5683  | -0.7804 |
| 8 | -1.6376 | -1.3631 | -0.3268 | -0.7783 |
| 1 | -0.3119 | 1.9825  | 0.2473  | 0.3792  |
| 1 | 1.3332  | 1.8260  | 0.0293  | 0.3323  |

| <b>a1Fbr -422.5791161</b> |         |         |         |         |
|---------------------------|---------|---------|---------|---------|
|                           | X       | y       | z       | NBO     |
| 9                         | 2.5353  | -0.2924 | -0.1021 | -0.4476 |
| 6                         | 1.2103  | -0.6219 | 0.3461  | 0.0864  |
| 6                         | 0.1859  | 0.2660  | -0.3158 | -0.1666 |
| 6                         | -1.2830 | -0.2824 | -0.0488 | 0.7612  |
| 7                         | 0.3086  | 1.6579  | 0.1313  | -0.8831 |
| 1                         | 1.2147  | -0.4727 | 1.4280  | 0.1518  |
| 1                         | 1.0435  | -1.6667 | 0.0922  | 0.1778  |
| 1                         | 0.3261  | 0.1663  | -1.4043 | 0.1675  |
| 8                         | -2.1504 | 0.6010  | 0.1374  | -0.7805 |
| 8                         | -1.4054 | -1.5258 | -0.0936 | -0.7807 |
| 1                         | 0.8514  | 2.2114  | -0.5215 | 0.3311  |
| 1                         | -0.6468 | 2.0161  | 0.1656  | 0.3827  |

| <b>a1Fcl -422.56904850</b> |         |         |         |         |
|----------------------------|---------|---------|---------|---------|
|                            | X       | y       | z       | NBO     |
| 7                          | -0.2009 | 1.8765  | -0.4481 | -0.8624 |
| 6                          | 0.1725  | 0.4533  | -0.5249 | -0.1571 |
| 6                          | -1.0451 | -0.4079 | -0.0052 | 0.7557  |
| 8                          | -1.3150 | -1.4361 | -0.6531 | -0.7538 |
| 8                          | -1.5886 | 0.0604  | 1.0297  | -0.8062 |
| 6                          | 1.4074  | 0.2144  | 0.3412  | 0.0872  |
| 1                          | -0.8089 | 1.9558  | 0.3681  | 0.3779  |
| 1                          | 0.6093  | 2.4769  | -0.3099 | 0.3161  |
| 1                          | 0.3957  | 0.1700  | -1.5574 | 0.1759  |
| 1                          | 2.1954  | 0.9427  | 0.1023  | 0.1208  |
| 1                          | 1.1415  | 0.2894  | 1.3996  | 0.1633  |
| 9                          | 1.9882  | -1.0581 | 0.1394  | -0.4176 |

| <b>aIFcr</b> -422.57147903 |         |         |         |         |
|----------------------------|---------|---------|---------|---------|
|                            | X       | y       | z       | NBO     |
| 7                          | -0.1249 | 1.9227  | -0.3029 | -0.8747 |
| 6                          | 0.1691  | 0.4784  | -0.4903 | -0.1549 |
| 6                          | -1.0162 | -0.4181 | 0.0230  | 0.7415  |
| 8                          | -1.4308 | -1.3040 | -0.7525 | -0.7641 |
| 8                          | -1.4254 | -0.0984 | 1.1712  | -0.8091 |
| 6                          | 1.4562  | 0.2279  | 0.2814  | 0.0964  |
| 1                          | -0.7864 | 2.2023  | -1.0221 | 0.3396  |
| 1                          | -0.6507 | 1.9641  | 0.5724  | 0.3671  |
| 1                          | 0.3460  | 0.2823  | -1.5517 | 0.1770  |
| 1                          | 2.2349  | 0.9275  | -0.0374 | 0.1397  |
| 1                          | 1.2736  | 0.3267  | 1.3549  | 0.1612  |
| 9                          | 1.9614  | -1.0746 | 0.0634  | -0.4197 |

### 3-Fluoroalanine Anion-CPCM

| <b>a1Fal<sub>aq</sub></b> -422.6816284 |         |         |         |         |
|----------------------------------------|---------|---------|---------|---------|
|                                        | X       | y       | z       | NBO     |
| 6                                      | 1.3248  | -0.6387 | -0.4439 | 0.0883  |
| 6                                      | 0.2099  | 0.3646  | -0.6624 | -0.1767 |
| 6                                      | -1.1213 | -0.1423 | -0.0114 | 0.7614  |
| 8                                      | -1.6553 | 0.5726  | 0.8729  | -0.8284 |
| 7                                      | 0.6576  | 1.7056  | -0.2821 | -0.8819 |
| 1                                      | -0.0625 | 2.3811  | -0.5379 | 0.3740  |
| 1                                      | 0.7226  | 1.7589  | 0.7352  | 0.3704  |
| 1                                      | 0.0324  | 0.3606  | -1.7475 | 0.2250  |
| 8                                      | -1.5564 | -1.2414 | -0.4508 | -0.8435 |
| 1                                      | 1.0357  | -1.6371 | -0.7705 | 0.1818  |
| 9                                      | 1.6260  | -0.7375 | 0.9504  | -0.4414 |
| 1                                      | 2.2483  | -0.3168 | -0.9287 | 0.1713  |

| <b>a1Fbl<sub>aq</sub></b> -422.6814324 |         |         |         |         |
|----------------------------------------|---------|---------|---------|---------|
|                                        | X       | y       | z       | NBO     |
| 9                                      | 2.4540  | -0.4680 | 0.0757  | -0.4384 |
| 6                                      | 1.0945  | -0.6462 | 0.4745  | 0.0783  |
| 6                                      | 0.1841  | 0.1640  | -0.4427 | -0.1635 |
| 6                                      | -1.2846 | -0.1613 | -0.0392 | 0.7671  |
| 7                                      | 0.4458  | 1.6035  | -0.4237 | -0.8856 |
| 1                                      | 1.0356  | -0.3043 | 1.5114  | 0.1689  |
| 1                                      | 0.8914  | -1.7164 | 0.4082  | 0.1787  |
| 1                                      | 0.3312  | -0.2093 | -1.4631 | 0.2054  |
| 8                                      | -1.8870 | 0.6807  | 0.6725  | -0.8225 |
| 8                                      | -1.7326 | -1.2695 | -0.4367 | -0.8327 |
| 1                                      | 0.0790  | 2.0022  | 0.4402  | 0.3755  |
| 1                                      | 1.4489  | 1.7865  | -0.4543 | 0.3689  |

| <b>a1Fbr<sub>aq</sub></b> -422.6814488 |         |         |         |         |
|----------------------------------------|---------|---------|---------|---------|
|                                        | X       | y       | z       | NBO     |
| 9                                      | -2.5036 | -0.3105 | 0.0673  | -0.4429 |
| 6                                      | -1.1795 | -0.6796 | -0.3315 | 0.0875  |
| 6                                      | -0.1796 | 0.2459  | 0.3317  | -0.1672 |
| 6                                      | 1.2766  | -0.2364 | 0.0465  | 0.7708  |
| 7                                      | -0.3913 | 1.6269  | -0.1087 | -0.8954 |
| 1                                      | -1.1541 | -0.5844 | -1.4195 | 0.1675  |
| 1                                      | -1.0405 | -1.7149 | -0.0262 | 0.1823  |



|   |         |         |         |         |
|---|---------|---------|---------|---------|
| 1 | -0.3052 | 0.1331  | 1.4234  | 0.1985  |
| 8 | 2.1358  | 0.6486  | -0.1923 | -0.8231 |
| 8 | 1.4784  | -1.4770 | 0.1195  | -0.8317 |
| 1 | -1.1206 | 2.0720  | 0.4466  | 0.3714  |
| 1 | 0.4724  | 2.1475  | 0.0327  | 0.3822  |

| <b>a1Fcl<sub>aq</sub></b> -422.67994399 |         |         |         |         |
|-----------------------------------------|---------|---------|---------|---------|
|                                         | X       | y       | z       | NBO     |
| 7                                       | -0.0432 | 1.9430  | -0.2859 | -0.8841 |
| 6                                       | 0.2055  | 0.5063  | -0.4796 | -0.1583 |
| 6                                       | -1.0320 | -0.2930 | 0.0086  | 0.7717  |
| 8                                       | -1.5946 | -1.0553 | -0.8208 | -0.8112 |
| 8                                       | -1.3753 | -0.1086 | 1.2065  | -0.8372 |
| 6                                       | 1.4658  | 0.0731  | 0.2633  | 0.0761  |
| 1                                       | -0.2118 | 2.1317  | 0.7031  | 0.3796  |
| 1                                       | 0.7696  | 2.4928  | -0.5702 | 0.3656  |
| 1                                       | 0.3424  | 0.3193  | -1.5491 | 0.1916  |
| 1                                       | 2.3414  | 0.6229  | -0.0920 | 0.1648  |
| 1                                       | 1.3482  | 0.1989  | 1.3421  | 0.1708  |
| 9                                       | 1.7374  | -1.3082 | 0.0365  | -0.4294 |

| <b>a1Fcr<sub>aq</sub></b> -422.68004928 |         |         |         |         |
|-----------------------------------------|---------|---------|---------|---------|
|                                         | X       | y       | z       | NBO     |
| 7                                       | 0.0041  | 1.9758  | -0.2092 | -0.8799 |
| 6                                       | 0.1897  | 0.5387  | -0.4696 | -0.1573 |
| 6                                       | -0.9957 | -0.3432 | 0.0175  | 0.7569  |
| 8                                       | -1.5318 | -1.1113 | -0.8258 | -0.8341 |
| 8                                       | -1.3345 | -0.2076 | 1.2240  | -0.8414 |
| 6                                       | 1.4874  | 0.1433  | 0.2213  | 0.0903  |
| 1                                       | -0.7046 | 2.3490  | -0.8416 | 0.3788  |
| 1                                       | -0.3597 | 2.0974  | 0.7375  | 0.3730  |
| 1                                       | 0.3080  | 0.3991  | -1.5488 | 0.2033  |
| 1                                       | 2.3335  | 0.6945  | -0.1928 | 0.1715  |
| 1                                       | 1.4223  | 0.2988  | 1.3009  | 0.1703  |
| 9                                       | 1.7570  | -1.2391 | 0.0232  | -0.4312 |
